# Supplementary material for: Identification of MATE Family and Characterization of GmMATE13 and GmMATE75 in Soybean’s Response to Aluminum Stress
Source: MDPI journal article supplement (doi:10.3390/ijms25073711), 2024-03-26
Supplement: s1 [file s1]

**Table S1.** Characters of the GmMATE proteins.

| <b>Gene name</b> | <b>JGI ID</b>   | <b>Protein<br/>length (aa)</b> | <b>Molecular<br/>weight(Da)</b> | <b>Isoelectric<br/>point</b> |
|------------------|-----------------|--------------------------------|---------------------------------|------------------------------|
| GmMATE1          | Glyma.01G007100 | 343                            | 36805.41                        | 7.48                         |
| GmMATE2          | Glyma.01G025200 | 491                            | 54297.15                        | 5.93                         |
| GmMATE3          | Glyma.01G026200 | 518                            | 56511.29                        | 5.77                         |
| GmMATE4          | Glyma.01G132200 | 538                            | 58666.11                        | 6.96                         |
| GmMATE5          | Glyma.01G213000 | 511                            | 55508.20                        | 8.23                         |
| GmMATE6          | Glyma.01G216600 | 541                            | 58998.70                        | 8.06                         |
| GmMATE7          | Glyma.02G038600 | 507                            | 55501.60                        | 6.73                         |
| GmMATE8          | Glyma.02G039500 | 492                            | 54733.67                        | 7.57                         |
| GmMATE9          | Glyma.02G075300 | 507                            | 54832.32                        | 8.50                         |
| GmMATE10         | Glyma.02G089900 | 476                            | 51784.54                        | 7.01                         |
| GmMATE11         | Glyma.02G090000 | 482                            | 52143.68                        | 5.59                         |
| GmMATE12         | Glyma.02G090100 | 475                            | 51329.79                        | 8.98                         |
| GmMATE13         | Glyma.02G181800 | 500                            | 53538.18                        | 7.72                         |
| GmMATE14         | Glyma.02G218400 | 527                            | 56999.57                        | 8.62                         |
| GmMATE15         | Glyma.02G310800 | 526                            | 56643.60                        | 9.70                         |
| GmMATE16         | Glyma.03G005200 | 488                            | 53896.75                        | 8.03                         |
| GmMATE17         | Glyma.03G005300 | 487                            | 53908.84                        | 6.45                         |
| GmMATE18         | Glyma.03G005400 | 487                            | 53628.32                        | 5.40                         |
| GmMATE19         | Glyma.03G005500 | 429                            | 47141.11                        | 8.87                         |
| GmMATE20         | Glyma.03G005600 | 490                            | 54084.85                        | 6.90                         |
| GmMATE21         | Glyma.03G005800 | 494                            | 54597.63                        | 7.50                         |
| GmMATE22         | Glyma.03G036200 | 539                            | 58602.06                        | 7.43                         |
| GmMATE23         | Glyma.04G089000 | 537                            | 58756.28                        | 8.80                         |
| GmMATE24         | Glyma.04G097700 | 524                            | 57266.61                        | 8.01                         |
| GmMATE25         | Glyma.04G097900 | 503                            | 55390.87                        | 5.29                         |
| GmMATE26         | Glyma.04G102100 | 199                            | 22101.34                        | 8.42                         |
| GmMATE27         | Glyma.05G001700 | 486                            | 52789.16                        | 6.55                         |
| GmMATE28         | Glyma.05G049700 | 531                            | 57947.35                        | 7.44                         |
| GmMATE29         | Glyma.05G054000 | 525                            | 57134.66                        | 8.93                         |
| GmMATE30         | Glyma.05G054100 | 315                            | 34689.82                        | 9.43                         |
| GmMATE31         | Glyma.05G226400 | 480                            | 51863.58                        | 8.14                         |
| GmMATE32         | Glyma.06G091100 | 548                            | 59505.15                        | 7.51                         |
| GmMATE33         | Glyma.06G103400 | 480                            | 52566.46                        | 7.86                         |
| GmMATE34         | Glyma.06G305200 | 517                            | 56027.78                        | 6.19                         |
| GmMATE35         | Glyma.06G318700 | 480                            | 51993.42                        | 9.03                         |
| GmMATE36         | Glyma.07G099900 | 469                            | 51260.00                        | 9.27                         |
| GmMATE37         | Glyma.07G100000 | 467                            | 50905.44                        | 9.15                         |
| GmMATE38         | Glyma.07G100100 | 422                            | 45942.72                        | 8.46                         |
| GmMATE39         | Glyma.07G124600 | 497                            | 53882.29                        | 6.59                         |
| GmMATE40         | Glyma.07G156100 | 539                            | 57276.57                        | 6.24                         |

|          |                 |     |          |      |
|----------|-----------------|-----|----------|------|
| GmMATE41 | Glyma.07G246100 | 506 | 55485.71 | 8.64 |
| GmMATE42 | Glyma.08G033200 | 494 | 53145.83 | 6.59 |
| GmMATE43 | Glyma.08G050500 | 498 | 54695.73 | 8.59 |
| GmMATE44 | Glyma.08G050700 | 475 | 52207.37 | 9.32 |
| GmMATE45 | Glyma.08G244400 | 173 | 19261.97 | 7.58 |
| GmMATE46 | Glyma.09G042700 | 528 | 57747.13 | 8.76 |
| GmMATE47 | Glyma.09G102800 | 556 | 59867.47 | 9.43 |
| GmMATE48 | Glyma.09G134000 | 522 | 57574.19 | 6.98 |
| GmMATE49 | Glyma.09G134100 | 488 | 54083.16 | 8.22 |
| GmMATE50 | Glyma.09G134200 | 488 | 54192.10 | 7.91 |
| GmMATE51 | Glyma.09G146800 | 572 | 62436.51 | 8.64 |
| GmMATE52 | Glyma.09G178700 | 323 | 35443.88 | 9.31 |
| GmMATE53 | Glyma.09G178800 | 444 | 48774.14 | 9.16 |
| GmMATE54 | Glyma.09G178900 | 474 | 51503.57 | 9.23 |
| GmMATE55 | Glyma.09G179000 | 489 | 53142.64 | 8.41 |
| GmMATE56 | Glyma.09G257400 | 510 | 55533.58 | 5.36 |
| GmMATE57 | Glyma.09G276100 | 542 | 59162.51 | 7.85 |
| GmMATE58 | Glyma.10G099900 | 501 | 53844.53 | 6.23 |
| GmMATE59 | Glyma.10G231800 | 80  | 8712.35  | 6.50 |
| GmMATE60 | Glyma.10G232200 | 494 | 54060.18 | 5.65 |
| GmMATE61 | Glyma.10G239000 | 530 | 57916.80 | 8.21 |
| GmMATE62 | Glyma.10G267300 | 478 | 52266.96 | 6.32 |
| GmMATE63 | Glyma.10G267400 | 477 | 52176.96 | 6.65 |
| GmMATE64 | Glyma.10G267600 | 146 | 16023.96 | 8.57 |
| GmMATE65 | Glyma.10G267700 | 475 | 51702.26 | 7.49 |
| GmMATE66 | Glyma.10G267800 | 459 | 49978.14 | 7.07 |
| GmMATE67 | Glyma.11G026300 | 534 | 58040.87 | 8.68 |
| GmMATE68 | Glyma.11G028900 | 467 | 50963.91 | 8.15 |
| GmMATE69 | Glyma.11G112100 | 548 | 59820.58 | 8.90 |
| GmMATE70 | Glyma.11G112200 | 546 | 59513.21 | 9.18 |
| GmMATE71 | Glyma.12G099300 | 441 | 48129.84 | 6.65 |
| GmMATE72 | Glyma.12G194000 | 504 | 54372.93 | 5.90 |
| GmMATE73 | Glyma.12G225600 | 287 | 31508.89 | 9.07 |
| GmMATE74 | Glyma.12G237400 | 549 | 69698.46 | 9.40 |
| GmMATE75 | Glyma.13G203000 | 428 | 46528.63 | 9.36 |
| GmMATE76 | Glyma.13G275400 | 504 | 55564.59 | 8.28 |
| GmMATE77 | Glyma.13G275500 | 500 | 55105.07 | 7.16 |
| GmMATE78 | Glyma.13G275600 | 536 | 59475.90 | 6.17 |
| GmMATE79 | Glyma.13G339800 | 555 | 59390.55 | 6.76 |
| GmMATE80 | Glyma.14G002000 | 559 | 60438.80 | 9.60 |
| GmMATE81 | Glyma.14G032400 | 505 | 55204.03 | 8.10 |
| GmMATE82 | Glyma.14G078000 | 483 | 52446.27 | 8.10 |
| GmMATE83 | Glyma.14G158100 | 129 | 14551.38 | 8.18 |
| GmMATE84 | Glyma.15G034600 | 554 | 59382.86 | 7.66 |

|           |                 |     |          |      |
|-----------|-----------------|-----|----------|------|
| GmMATE85  | Glyma.15G107100 | 505 | 54762.52 | 7.09 |
| GmMATE86  | Glyma.15G150300 | 516 | 56369.59 | 8.62 |
| GmMATE87  | Glyma.15G274600 | 553 | 59165.46 | 9.46 |
| GmMATE88  | Glyma.16G149100 | 261 | 29192.42 | 7.91 |
| GmMATE89  | Glyma.16G157300 | 505 | 54515.81 | 8.39 |
| GmMATE90  | Glyma.16G180000 | 477 | 52924.83 | 5.98 |
| GmMATE91  | Glyma.16G180200 | 488 | 54132.13 | 6.64 |
| GmMATE92  | Glyma.16G198700 | 562 | 60875.93 | 8.63 |
| GmMATE93  | Glyma.17G027900 | 507 | 55484.66 | 8.39 |
| GmMATE94  | Glyma.17G131700 | 511 | 55550.12 | 8.48 |
| GmMATE95  | Glyma.17G136400 | 505 | 55034.06 | 8.91 |
| GmMATE96  | Glyma.17G136500 | 507 | 55266.87 | 9.26 |
| GmMATE97  | Glyma.17G175100 | 355 | 38042.08 | 9.12 |
| GmMATE98  | Glyma.17G247400 | 483 | 52470.19 | 6.62 |
| GmMATE99  | Glyma.18G110800 | 112 | 12473.05 | 5.38 |
| GmMATE100 | Glyma.18G143700 | 509 | 55625.41 | 6.30 |
| GmMATE101 | Glyma.18G206500 | 593 | 64280.52 | 5.83 |
| GmMATE102 | Glyma.18G214800 | 505 | 55348.60 | 8.52 |
| GmMATE103 | Glyma.18G235200 | 505 | 55266.15 | 5.60 |
| GmMATE104 | Glyma.18G293100 | 480 | 51993.52 | 9.07 |
| GmMATE105 | Glyma.18G293200 | 406 | 43894.12 | 6.04 |
| GmMATE106 | Glyma.18G293300 | 288 | 41861.79 | 8.04 |
| GmMATE107 | Glyma.19G001600 | 498 | 53804.16 | 6.32 |
| GmMATE108 | Glyma.19G120200 | 495 | 54624.36 | 7.60 |
| GmMATE109 | Glyma.19G120300 | 496 | 54692.57 | 8.04 |
| GmMATE110 | Glyma.19G120700 | 400 | 44084.40 | 6.72 |
| GmMATE111 | Glyma.19G120900 | 491 | 54183.95 | 6.16 |
| GmMATE112 | Glyma.19G244000 | 273 | 29530.09 | 9.27 |
| GmMATE113 | Glyma.20G123300 | 555 | 60571.17 | 7.40 |
| GmMATE114 | Glyma.20G123400 | 409 | 44326.97 | 5.13 |
| GmMATE115 | Glyma.20G123500 | 476 | 52024.51 | 6.65 |
| GmMATE116 | Glyma.20G155500 | 550 | 60448.62 | 8.30 |
| GmMATE117 | Glyma.20G162000 | 494 | 54051.22 | 5.78 |
| GmMATE118 | Glyma.05G243100 | 373 | 41788.58 | 9.42 |
| GmMATE119 | Glyma.06G099600 | 102 | 11263.01 | 7.74 |
| GmMATE120 | Glyma.08G282600 | 351 | 38073.32 | 5.96 |
| GmMATE121 | Glyma.11G133900 | 125 | 13457.96 | 6.00 |
| GmMATE122 | Glyma.12G122000 | 208 | 22412.43 | 9.15 |
| GmMATE123 | Glyma.16G180100 | 235 | 26168.82 | 8.62 |
| GmMATE124 | Glyma.18G097600 | 494 | 54051.22 | 5.78 |

**Table S2.** Conserved sequence detected in GmMATE.

| Motif number | Amino acid sequence   |
|--------------|-----------------------|
| 1            | TLCGQAYGAKZYHMLGVYLQR |

|    |                                       |
|----|---------------------------------------|
| 2  | AJPSAVMVCLEWWYFEILVLLAGLLPNPK         |
| 3  | JWJFMEPILLLLQDPEIAEVAGLYAJWLIPALFAYAV |
| 4  | GVARGSGWQKJGAYVNLGCYY                 |
| 5  | SAAASTRVSNELGAGNPKA                   |
| 6  | YLLSVISTAFVGHLELELAA                  |
| 7  | FPLQRFLQTQSITLP                       |
| 8  | KKTWTGFSFEAFKJWEFFKL                  |
| 9  | AISFANVTGFSVLSGLAGGLE                 |
| 10 | LRHVWGYIFTNDKEVVD                     |

**Table S3.** MATE protein sequence used in constructing the phylogenetic tree.

| ID            | Sequence                                                                                                                                                                                                                                                                                                                                                                                                                                                                                                                                                          |
|---------------|-------------------------------------------------------------------------------------------------------------------------------------------------------------------------------------------------------------------------------------------------------------------------------------------------------------------------------------------------------------------------------------------------------------------------------------------------------------------------------------------------------------------------------------------------------------------|
| AT1G1<br>1670 | MGSEATTAVNNLQQPLLESTKSEADFRMESVLTDTHLSTYFRRRIYLASLIEMKYLF<br>HLAAPAIFVYVINNGMSMLTRIFAGRLGSMQLAAASLGNSGFNMFTLGLMLG<br>MGSAVETLCGQAHGAHRYDMLGVYLQRSTIVLVITGLPMTLLFIFSKPLLISLGE<br>PADVASVASVFVYGMIPMIFAYAVNFPIQKFLQSQSIVTPSAYISAATLVIHLILS<br>WLSVFKFGWGLLGLSVVHSLSWWIIVLAQIIYIKISPRCRRTWDGFSWKAFDGL<br>WDFQQLSAAASAVMLCLESWYSQILVLLAGLLKDPELALDSLAIKMSISAMSFMV<br>SVGFNAAAASVRVSNELGAGNPRSAAFSTAVTTGVSFLLSLFEAIVILSWRHVISYI<br>FTDSPAVAEVAELSPFLAITIVLNGVQPVLSGVAVGCGWQAYVAYVNIGCYII<br>VGIPIGYVLGFTYDMGARGIWTGMIGGTLMQTIILVIVTFRTDWDKEVEKASRRL<br>DQWEDTSPLLKQ    |
| AT1G1<br>2950 | MEKDNDFKDPFLASTEELDPATQKALMEYLGVGSRASSLVSFSSTAVDIPPIS<br>GVGDFVREFRIESRKLWKLGAFTTMSQYSLGAVTQVFAGHISTLALAAVSIE<br>NSVIAGFSFGIMLGMGSALETLCGQAFGAGKVSMLGVYLQRSWVILSVTALFLS<br>LIYIFAAPILTFIGQTAASAMAGIFSIYMIPQIFAYAINFPTAKFLQSQSKIMVMA<br>GISGVVLVIHSSFTWLMSRLHWGLPGLALVLNTSWWVIVVAQLVYIFNCTCG<br>EAWSGFTWEAFHNLWGFVKLSLASAAMLCLEIWYFMALVLFAGYLKNAEVS<br>AALSICMNILGWAAMVAFGTNAASVRVSNELGASHPRTAKFSLVAVILSTAI<br>GMFIAAGLLFFRNEYPVLFVEDEEVNRNVRELTPMLAFCIVINNVPVLSGVAV<br>GAGWQAVVAYVNIACYLFGVFPGLLLGFKLEYGVMGIWWGMVTGTFVQSIV<br>LTWMICKTNWEKEASMAERIKEWGGVPAEKETLLN |
| AT1G1<br>5150 | MQDAERTTNDPVDRIEKVTWRDLQDGSFTAELKRLICFAAPMAAVVIIQFMIQI<br>ISMVMVGHLGRLSLASASFAVSFCNVTGFSFIIGLSCALDTLSGQAYGAKLYRKL<br>GVQAYTAMFCLTLVCLPLSLLWFNMGKLIVILGQDPAIAHEAGRYAAWLIPGL<br>FAYAVLQPLIRYFKNQSLITPLLVTSSVVFCHVPLCWLLVYKSGLGHIGGALALS<br>LSYWLYAIFLGSMYYSSACSETRAPLTMEIFEGVREFIKYALPSAAMLCLEWWS<br>YELIILLSGLLPNPQLETSVLSICFETLSITYSIPLAIAAASTRISNELGAGNSRAA<br>HIVVYAAMSLAVMDALMVMSLLAGRHVFGHVFSDDKKTIEYVAKMAPLVVIS<br>IILDSLQGVLSGVASGCGWQHIGAYINFGAFYLVGPIAASLAFWVHLKGVGL<br>WIGILAGAVLQTLALLVTGCTNWKTQAREARERMAVAHESELTESELP                                  |
| AT1G1<br>5160 | MEDAESTTKDPVDRVEKVTWRDLQDGSFTAELKKLICFAAPMAAVVITQSMLQ<br>IITMVIVGHLGRLSLASASFAISFCNVTGFSFIMGLSCALDTLSGQAYGAKLYRKL<br>GVQAYTAMFCLTLVCLPLSLLWFNMGKLLVILGQDPSIAHEAGRFAAWLIPGL                                                                                                                                                                                                                                                                                                                                                                                        |

---

|               |                                                                                                                                                                                                                                                                                                                                                                                                                                                                                                                                                                                                                                                                                                                                                                                                                                                                                                                                                                                                                                                                                                                                                                                                                                                                                                                                                                                                                                                                                                                                                                                                                                                                                                                                                                                                                                                                                                                                                                                                                                                                                                                                                                                                                                                                                                                                                                                                                                                                                                                                                  |
|---------------|--------------------------------------------------------------------------------------------------------------------------------------------------------------------------------------------------------------------------------------------------------------------------------------------------------------------------------------------------------------------------------------------------------------------------------------------------------------------------------------------------------------------------------------------------------------------------------------------------------------------------------------------------------------------------------------------------------------------------------------------------------------------------------------------------------------------------------------------------------------------------------------------------------------------------------------------------------------------------------------------------------------------------------------------------------------------------------------------------------------------------------------------------------------------------------------------------------------------------------------------------------------------------------------------------------------------------------------------------------------------------------------------------------------------------------------------------------------------------------------------------------------------------------------------------------------------------------------------------------------------------------------------------------------------------------------------------------------------------------------------------------------------------------------------------------------------------------------------------------------------------------------------------------------------------------------------------------------------------------------------------------------------------------------------------------------------------------------------------------------------------------------------------------------------------------------------------------------------------------------------------------------------------------------------------------------------------------------------------------------------------------------------------------------------------------------------------------------------------------------------------------------------------------------------------|
|               | FAYAVLQPLTRYFKNQSLITPLLITSCVVFCLHVPLCWLLVYKSGLDHIGGALAL<br>SLSYWLYAIFLGSMYFSSACSETRAPLTMEIFEGVREFIKYALPSAAMLCLEWW<br>SYELIILLSGLLPNPQLETSVLSVCLQTLSTMTYSIPLAIAAAASTRISNELGAGNSR<br>AAHIVVYAAMSLAVVDALMVGTSLLAGKNLLGQVFSSDKNTIDYVAKMAPLV<br>SISLILDSLQGVLSGVASGCGWQHIGAYINFGAFYLVGPIAASLAFWVHLKGV<br>GLWIGIAGAVLQTLLLALVTGCINWENQAREARKRMAVAHESELTESELPF<br>MGDAESTKDRLLLPVERVENVTWSDLRDGSFTVELKRLIFFAAPMAAVVIAQF<br>MLQIVSMMMVGHLGNLSLASASSFCNVTGFSFIIGLSCALDTLSGQAYGAK<br>LYRKLGVQTYTAMFCLALVCLPLSLIWFNMEKLLLILGQDPSIAHEAGKYATWL<br>IPGLFAYAVLQPLTRYFQNNQSLITPLLITSYVVFCHVPLCWFLVYNSGLGNLGG<br>ALAISLSNWLYAIFLGSMYSSACSETRAPLSMEIFDGIGEFFKYALPSAAMICL<br>EWWSYELIILLSGLLPNPQLETSVLSVCLQTISTMYSIPLAIAAAASTRISNELGAG<br>NSRAAHIVVYAAMSLAVIDALIVSMSLLIGRNLFGHIFSSDKETIDYVAKMAPLV<br>SISLMLDALQGVLSGIARGCGWQHIGAYINLGAFLYLVGPIAASLAFWIHLKGV<br>GLWIGIQAGAVLQTLLLALVTGCTNWESQADKARNRMALAYGT<br>MGDAESTSKTSLLPVERVENVTWRDLRDGLFTAELKRLICFAAPMAAVVIAQF<br>MLQIISMVMVGHLGNLSLASASSFCNVTGFSFIVGLSCALDTLSGQAYGAK<br>LYRKVGQTYTAMFCLALVCLPLTLIWLNMETLLVFLGQDPSIAHEAGRYAAC<br>LIPGLFAYAVLQPLTRYFQNNQSMITPLLITSCFVFCLHVPLCWLLVYKSGLGNLGG<br>GALALSFSNCLYTIILGSLMCFSSACSETRAPLSMEIFDGIGEFFRYALPSAAMICL<br>EWWSYELIILLSGLLPNPQLETSVLSVCLQTTATVYSIHLAIAAAASTRISNELGA<br>GNSRAANIVVYAAMSLAVVEILILSTSLLVGRNVFGHVFSDDKETIDYVAKMAP<br>LVSISLILDGLQGVLSGIARGCGWQHIGAYINLGAFLYLVGPIAASLAFWIHLKGV<br>VGLWIGIQAGAVLQTLLLTLVTGCTNWESQADKARNRMALAYGT<br>METLNVDHEDTISSEQEHRAHTKSDTDMPPISGGRDFIRQFAAESKKLWWLAG<br>PAIFTSFCQYSLGAVTQILAGHVNTLALAAVSIQNSVISGFSVGIMLGMGSALAT<br>LCGQAYGAGQLEMMGIYLQRSWIILNSCALLLCLFYVFATPLLSLLGQSPEISKA<br>AGKFSLWMIPQLFAYAVNFATAKFLQAQSKVIAMAVIAATVLLQHTLLSWLL<br>MLKLRWGMAGGAVVLNMSWWLIDVTQIVYICGSSGRAWSGLSWMAFKNL<br>RGFARLSLASAVMVCLEVWYFMALILFAGYLKNPQVSVAALSICMNILGWPIM<br>VAFGFNAAVSVRESNELGAEHPRRAKFLIVAMITSVIGIVISVTLIVLRDKYPA<br>MFSDDEEVRVLVKQLTPLLALTIVINNIQPVLSGVAVGAGWQGIVAYVNIGCY<br>LCGIPIGLVLGYKMELGVKGIWTGMLTGTVVQTSVLLFIYRTNWKKEASLAEA<br>RIKKWGDQSNKREEIDLCEEDENNSNGENNNHRK<br>MARREGEVTETLLKKSTENRGEDRDGLGMKEKVVWRESKKLWVWAGPAIFTRFS<br>TSGLSLISQAFIHLGSTELAAYSITLTVLLRFSNGILLGMSALETLGQAYGAK<br>QYHMLGIYLQRSWIVLTGCTICLMPYIFAGPILLALGQEERLVRVARIIALWVIGI<br>NISFVPSFTCQMFLQAQSKNKIIAYVAASVLSGVHVFSLWLLVVHFDGFIAGAMT<br>SSLVAHWLPNIAQVLFVTCGGCTETWRGFSWLAFKDLWPVFKLSVSSGGMICL<br>ELWYNSILILLTGNLKNAEVALNALAICININALEMMVAFGFMAAASVRVSNEI<br>GSGNSNGAKFATMVVVSTLSIGIIFFIFLFLRERSYIFTTSEAVATQVADLSPLL<br>AFSILLNSIQPVLSGVAVGAGWQKYVTVVNLACYLVGIPSGFLGYVVGLQVK<br>GVWLGMIFGIFVQTCVLTVMTMRTDWDQVSSSLKRLNRWVEPESPSRNQTL<br>QNE |
| AT1G1<br>5170 |                                                                                                                                                                                                                                                                                                                                                                                                                                                                                                                                                                                                                                                                                                                                                                                                                                                                                                                                                                                                                                                                                                                                                                                                                                                                                                                                                                                                                                                                                                                                                                                                                                                                                                                                                                                                                                                                                                                                                                                                                                                                                                                                                                                                                                                                                                                                                                                                                                                                                                                                                  |
| AT1G1<br>5180 |                                                                                                                                                                                                                                                                                                                                                                                                                                                                                                                                                                                                                                                                                                                                                                                                                                                                                                                                                                                                                                                                                                                                                                                                                                                                                                                                                                                                                                                                                                                                                                                                                                                                                                                                                                                                                                                                                                                                                                                                                                                                                                                                                                                                                                                                                                                                                                                                                                                                                                                                                  |
| AT1G2<br>3300 |                                                                                                                                                                                                                                                                                                                                                                                                                                                                                                                                                                                                                                                                                                                                                                                                                                                                                                                                                                                                                                                                                                                                                                                                                                                                                                                                                                                                                                                                                                                                                                                                                                                                                                                                                                                                                                                                                                                                                                                                                                                                                                                                                                                                                                                                                                                                                                                                                                                                                                                                                  |
| AT1G3<br>3080 |                                                                                                                                                                                                                                                                                                                                                                                                                                                                                                                                                                                                                                                                                                                                                                                                                                                                                                                                                                                                                                                                                                                                                                                                                                                                                                                                                                                                                                                                                                                                                                                                                                                                                                                                                                                                                                                                                                                                                                                                                                                                                                                                                                                                                                                                                                                                                                                                                                                                                                                                                  |

---

---

|       |      |                                                                                                                                                                                                                                                                                                                                                                                                                                                                                                                                                                                                                                                                                                                                                                                          |
|-------|------|------------------------------------------------------------------------------------------------------------------------------------------------------------------------------------------------------------------------------------------------------------------------------------------------------------------------------------------------------------------------------------------------------------------------------------------------------------------------------------------------------------------------------------------------------------------------------------------------------------------------------------------------------------------------------------------------------------------------------------------------------------------------------------------|
|       |      | MAGEGGELTAALLKKTENGGEENDELGLKEKVVIESKKLWVVAAPSIFTKFS<br>TYGVSLVTQGFVGHIGPTELAAYSITFTVLLRFSNGILLGMASALGTLCCQAYGA<br>KQYHMLGIHLQRSWIVLTGCTICIMPIFIFSGPILLALGQEDHIVRVARVIALWLI<br>AINFTFVPAFTCQIFLQSQSKNKIIAYVSAVTLGLHVFFSWLLVVHFNFGITGAM                                                                                                                                                                                                                                                                                                                                                                                                                                                                                                                                                   |
| AT1G3 | 3090 | TSTLVAFWMPNIVQLLYVTSGGCKDTWRGFTMLAFKDLWPVFKLSLSSGGMV<br>CLELWYNSILVLLTGNLKNAEVAIDALAICINVNALQMMIALGFLAAVSVRVS<br>NELGRGNPEGAKFATIVAVFTSLSIGLVFFVFLFLRGRISYIFTTSEAVAAEVADL<br>SPLLAFSILLNSVQPVLSGVAVGAGWQGYVAYINLACYLLGIPVGLVLGYVVG<br>LQVKGVWIGMLFGIFVQTCVLTIMTLRTDWDQVSTSLKNINRWVVPESRDAN<br>QISSEE                                                                                                                                                                                                                                                                                                                                                                                                                                                                                     |
| AT1G3 | 3100 | MAGRGGELTEALVKKTGREEEDELGMKEKVVIESKKLWVVAAPAIFFTRYSTFG<br>VSMVTQAFIGHLGPTELAAYSITFTILLRFSNGILLGMAGALGTLCCQAYGAKQ<br>YQMLGIYLQRSWIVLTGGTICLMPVFIFAGPILLALGQEERIVRVARVLALWVIGI<br>NFSFVPSFTCQMFLQAQSKNKIISYVTAVSLGLHVFFSWLLVAHFNFGITGAMTS<br>MLIAFWLPIIVQLLYVTCGGCKDTWRGFSMLAFKDLWPVLKLSLSSGGMCLCEL<br>WYNSVLVLLTGNLKNAEVALDALAICISINALEMMIALGFLAAVSVRVSNELGS<br>GNPKGAKFATLIAVFTSLSIGIVLFFVFLFLRGRISYIFTTSEAVAAEVADLSPLLA<br>SILLNSVQPVLSGVAIGAGWQGYVAYVNLACYLVGIPIGVILGYVVGLQVKGV<br>WIGMLFGIFVQTCVLTVMTLRTDWDQVSTSLRNINRWVVPESRDANQISSEE<br>MAGGGGELTAALLKKTAEENGEEKDELGLKQKVVIESKKLWIVAAPAIFFTRFS<br>TFGVSIISQSFIGHLGPIELAAYSITFTVLLRFSNGILLGMASALETLCCQAYGAKQ<br>NHMLGIYLQRSWIVLTGCTICLTPVYIFSGPILLALGQEERIVRVARIIALWVIGIN<br>FSFVPSFTCQMFLQAQSKNKIIAYVAASVSLGVHVFLSWLLMVHFNFGITGAMTS |
| AT1G3 | 3110 | TLVAFWLPNIAQLLFVTCGGCKDTWRGFSMMAFKDLWPVFKLSMSSGGMCLCL<br>ELWYNSILVLLTGNLKNAEVALDALAICLNINGLEMMIALGFLAAASVRVSNE<br>LGSGNPKGAKFATLTAVFTSLSLGIVLFFVFLFLRGRVSYIFTTSEAVAAEVADLS<br>PLLAFSILMNSVQPVLSGVAVGAGWQGYVTYVNLACYLVGIPIGIILGYVVGL<br>QVKGVWIGMLFGIFVQTCVLTVMTLRTDWDQVSTSLRRLNRWVVPESRDVN<br>QVSSEE                                                                                                                                                                                                                                                                                                                                                                                                                                                                                     |
| AT1G4 | 7530 | MGKDKTLPLDPREPPELTGTKSASKVWAKEFGEESKRLWELAGPAIFTAISQYS<br>LGALTQTFSGRLGELELAASVSVENSISGLAFGVMLGMGSALETLCGQAYGAG<br>QIRMMGIYMQRSWVILFTTALFLLPVYIWAPPILSFFGEAPHISKAAGKFALWMI<br>PQLFAYAANFPIQKFLQSQRKVLVMAWISGVVLVIHAVFSWLFILYFKWGLVG<br>AAITLNTSWWLIVIGQLLYILITKSDGAWTGFSMLAFRDLYGFVKLSLASALMLC<br>LEFWYLMVLVVVTGLLPNPLIPVDAISICMNIEGWTAMISIGFNAAISVRVSNEL<br>GAGNAALAKFSVIVVSITSTLIGIVCMIVVLATKDSFPYLFTSSEAVAAETTRIAVL<br>LGFTVLLNSLQPVLSGVAVGAGWQALVAYVNIACYIIGLPAGLVLGFTLDLGV<br>QGIWGGMVAGICLQTLILIGIYFTNWNKEAEQAESRVQRWGGTAQE<br>MMSEDGYNTDFPRNPLYIFFSDFRSVLKFDELGLEIARIALPAALALTADPIASLV<br>DTAFIGQIGPVELAAVGVSIALFNQVSRIAIFPLVSITTSFVAEEDACSSQQDTRV                                                                                                                                |
| AT1G5 | 1340 | DHKECIEIGINNPTEETIELIPEKHKDSLDEFKTSIFSISKPPAKKRNPSSASSALI<br>IGGVLGLFQAVFLISAAKPLLSFMGVKHDSPMMRPSQRYLSLRSLGAPAVLLSL<br>AAQGVFRGFKDTTTPLFATVIGDVTNIILDPIFIFVRLGVTGAATAHVISQYLMC<br>GILLWKLMGQVDIFNMSTKHLQFCRFMKNGFLLLMRVIAVTFCVTLASLAAR                                                                                                                                                                                                                                                                                                                                                                                                                                                                                                                                                   |

---

---

|  |                                                                                                                                                                                                                                                                                                                                                                                                                                                                                                                                                                                                                                                                                                                                                                                                                                                                                                                                                                                                                                                                                                                                                                                                                                                                                                                                                                                                                                                                                                                                                                                                                                                                                                                                                                                                                                                                                                                                                                                                                                                                                                                                                                                                                                                                                                                                                                                                                                                                                                                                          |
|--|------------------------------------------------------------------------------------------------------------------------------------------------------------------------------------------------------------------------------------------------------------------------------------------------------------------------------------------------------------------------------------------------------------------------------------------------------------------------------------------------------------------------------------------------------------------------------------------------------------------------------------------------------------------------------------------------------------------------------------------------------------------------------------------------------------------------------------------------------------------------------------------------------------------------------------------------------------------------------------------------------------------------------------------------------------------------------------------------------------------------------------------------------------------------------------------------------------------------------------------------------------------------------------------------------------------------------------------------------------------------------------------------------------------------------------------------------------------------------------------------------------------------------------------------------------------------------------------------------------------------------------------------------------------------------------------------------------------------------------------------------------------------------------------------------------------------------------------------------------------------------------------------------------------------------------------------------------------------------------------------------------------------------------------------------------------------------------------------------------------------------------------------------------------------------------------------------------------------------------------------------------------------------------------------------------------------------------------------------------------------------------------------------------------------------------------------------------------------------------------------------------------------------------------|
|  | EGTSMAAFQVCLQVWLATSLLADGYAVAGQAILASAFKKDYKRAAATASR<br>VLQLGLVLGFVLAVILGAGLHFGARVFTKDDKVLHLISIGLPFVAGTQPINALAF<br>VFDGVNFGASDFGYAAASLVMVAIVSILCLLFLSSTHGFGLWFGLTIYMSLRAA<br>VGFWRIGHTGPWSFLRS<br>MCNSKPSSASSSLLSCKDKTHISKLETCDTDNPHYSEFRDTSLDLKRWPSFLEG<br>LEEYKAIGKISGPTAMTGLLMYSRAMISMLFLGYLGELELAGGSLSIGFANITGYS<br>VISGLSMGMEPICQAYGAKQMKLLGLTLQRTVLLLLSCSVPIFSWLNMRILL<br>WCGQDEEISSVAQQFLFAIPDLFLLSLLHPLRIYLRTQNITLPVITYSTAVSVLLH<br>AT1G5 VPLNYLLVVKLEMGVAGVAIAMVLTNLNLVLLSSFVYFTSVHSDTWVPITIDS<br>8340 LKGWSALLSLAIPTCVSVCLEWWWYEFMIILCGLLANPRATVASMGIQTAL<br>VYVFPSSSLGVSTRISNELGAKRPAKARVSMIISLFCIALGLMAMVFAVLVRH<br>HWGRLFTTDAEILQLTSIALPIVGLCELGNCPQTTGCGVLRGCARPTLGANINL<br>GSFYFVGMPVAILFGFVFKQGFPGLWFGLLAAQATCASMLCALLRTDQWVQ<br>AERAEELTSQTPGKSPPLLPIASSKSRSTSGTEDMMRTMLV<br>MNSELENLHRPLIESSKSFVDYRLETVLTDRPEYFRRIYLAMMIEMKFLFHLA<br>APAIFVYVINNGMSILTRIFAGHVGSFELAAASLGNSGFNMFTYGLLLGMGSAV<br>ETLCGQAHGAHRYEMLGVYLQRSTVVLILTCLPMSFLFLSPNILTALGEPEQVA<br>TLASVFVYGMIPVIFAYAVNFPIQKFLQSQSIVTPSAYISAATLVIHLILSWIAVYR<br>AT1G6 LGYGLLALSLIHSFSWWIIVVAQIVYIKMSPRCRRTWEGFSWKAPEGLWDFFRLS<br>1890 AASAVMLCLESWYSQILVLLAGLLKNPELALDSLAIKMSISAIKFMVSVGFNA<br>ASVRVSNELGAGNPRAAAFSTVTTGVSFLLSVFEAIVVLSWRHVISAFTDSPA<br>VAEAVADLSPFLAITIVLNGIQPVLSGVAVGCGWQAFVAYVNIGCYVVGIPVG<br>FVLGFTYDMGAKGIWTGMIGGTLMQTIILVIVTLRTDWDKEVEKASSRLDQWE<br>ESREPLLKQ<br>METDFSLVRKEEEEEEDNRNGMSYLSMEMMKKVSSMAAPMVAVSVSQFLLQV<br>ISMVMAGHLDELSLSAVAIATSLTNVTGFSLVGFAGALDTLCGQAFGAEQFGK<br>IGAYTYSSMLCLLVFCFSISIVWFFMDKLEIFHQDPLISQLACRYSIWLIPALFGFT<br>LLQPMTRYFQSQGITLPLFVSSLGALCFHIPFCWLLVYKLFKFGIVGAALSIGFSYW<br>AT1G6 LNVFLLWIFMRYALHREMKNLGLQELISSMKQFIALAIPSAMMICLEWWSFEIL<br>4820 LLMSGLLPNSKLETSVISICLTTSVHFVLVNAIGASASTHVSNELGAGNHRAAR<br>AAVNSAIFLGGVGALITTITLYSRKSWGYVFSNEREVVRYATQITPILCLSIFVNS<br>FLAVLSGVARGSGWQRIGGYASLGSYYLVGIPLGWFLCFVMKLRGKGLWIGILI<br>ASTIQIVFALVTFFTNWEQEATKARDRVFEMTPQVKGNQKTQIIVEEDTQVLL<br>NHIAETV<br>MKKSIETPLLLNTKQSQDEDEKIRWEKMKKVASMAAPMVAVNMSQYLLQAT<br>STMIVGHRSELALAGIALGSSFANVTGFGVLFGLSGSLETLCGQAYGAKQYHKL<br>GSYTFTSIVFLLIISVPISILWMFMNQILLLLHQDPQIAELAGVYCLWLVPALFGYS<br>VLESIVRYFQSQSLIYPMVLSSLAALSFHVPLCWLMVHKFDFGAKGAAASIGISY<br>AT1G6 WLNVAFLWVYMKRSSRCVETRIYMSKDVVHTNIFFQFAIPSAMMCLEWLAF<br>6760 EVITLLSGLLPNSKLETSVISICLTSSSLHYNLVNGIGDAASTNVANELGAGNPRG<br>ARDSAAAIIIAAVESVIVSSSLFLRSVWPYAYSNEVEVISYVTDITPILCISILMDS<br>FLTVLSGIVRGTGWQKIGAYVNITSYYVIGIPVGLLLCFHLHFNGKGLWAGLVT<br>GSTLQTLILFLVIGFTNWSKEAIKARERIGDEKVWRHDSLLN<br>AT1G6 MENGFSLVPKEEEEEEDYSNEKSEDQTSYYLSTEMMKKVSFMAAPMVAVAASQ |
|--|------------------------------------------------------------------------------------------------------------------------------------------------------------------------------------------------------------------------------------------------------------------------------------------------------------------------------------------------------------------------------------------------------------------------------------------------------------------------------------------------------------------------------------------------------------------------------------------------------------------------------------------------------------------------------------------------------------------------------------------------------------------------------------------------------------------------------------------------------------------------------------------------------------------------------------------------------------------------------------------------------------------------------------------------------------------------------------------------------------------------------------------------------------------------------------------------------------------------------------------------------------------------------------------------------------------------------------------------------------------------------------------------------------------------------------------------------------------------------------------------------------------------------------------------------------------------------------------------------------------------------------------------------------------------------------------------------------------------------------------------------------------------------------------------------------------------------------------------------------------------------------------------------------------------------------------------------------------------------------------------------------------------------------------------------------------------------------------------------------------------------------------------------------------------------------------------------------------------------------------------------------------------------------------------------------------------------------------------------------------------------------------------------------------------------------------------------------------------------------------------------------------------------------------|

---

|               |                                                                                                                                                                                                                                                                                                                                                                                                                                                                                                                                                                                                                                                                                                                                                                                                                                                                                                                                                                                                                                                                                                                                                                                                                                                                                                                                                                                                                                                                                                                                                                                                                                                                                                                                                                                                                                                                                                                                                                                                                                                                                                                                                                                                                                                                                                                                                                                                                                                                                                                                                                                                                       |
|---------------|-----------------------------------------------------------------------------------------------------------------------------------------------------------------------------------------------------------------------------------------------------------------------------------------------------------------------------------------------------------------------------------------------------------------------------------------------------------------------------------------------------------------------------------------------------------------------------------------------------------------------------------------------------------------------------------------------------------------------------------------------------------------------------------------------------------------------------------------------------------------------------------------------------------------------------------------------------------------------------------------------------------------------------------------------------------------------------------------------------------------------------------------------------------------------------------------------------------------------------------------------------------------------------------------------------------------------------------------------------------------------------------------------------------------------------------------------------------------------------------------------------------------------------------------------------------------------------------------------------------------------------------------------------------------------------------------------------------------------------------------------------------------------------------------------------------------------------------------------------------------------------------------------------------------------------------------------------------------------------------------------------------------------------------------------------------------------------------------------------------------------------------------------------------------------------------------------------------------------------------------------------------------------------------------------------------------------------------------------------------------------------------------------------------------------------------------------------------------------------------------------------------------------------------------------------------------------------------------------------------------------|
| 6780          | YLLQVISIVMAGHLDELSLSAVAIATSLTNVTGFSLIFGLAGALETLCGQAFGAG<br>QFRNISAYTYGSMCLLLVCFPISLLWVFMDKLLELFHQDPLISQLACRYSIWLIP<br>ALFGYSVLQSMTRFFQSQGLVLPFLSSLGALFFHVPFSWLLVYKLRFGIVGAAL<br>SIGFSYWLNVGLLWAFMRDSALYRKNWNLRAQEIFLSMKQFITLAIPTAMMTC<br>LEWWSFELLILMSGLLPNSKLETSVLSICLTMSSLHYVIVNAIGAAASTHVSNKL<br>GAGNPKAARSAANSAIFLGMIDAAIVSISLYSYRRNWAYIFSNESEVADYVTQIT<br>PFLCLSIGVDSFLAVLSGVARGTGWQHIGAYANIGSYLVGIPVGSILCFVVKLR<br>GKGLWIGILVGSTLQTIVLALVTFFTNWEQEVAKARDRVIEMIPQEII<br>MDSAEEKGLLVVSDREEVNKKDGFRETCKLSYIAGPMIAVNSSMYVLQVISIMM<br>VGHLGELFLSSTAIAVSFCSVTGFSVVFGLASALETLCGQANGAKQYEKLGVHT<br>YTGIVSLFLVCIPLSLLWTYIGDILSLIGQDAMVAQEAGKFATWLIPALFGYATLQ<br>PLVRFFQAQSLILPLVMSSVSSLCIHIVLCWSLVFKFGLGSLGAAIAIGVSYWLNV<br>TVLGLYMTFSSSSCSKSRATISMSLFEGMGFFRFGIPSASMICLEWWSFEFLVLLSG<br>ILPNPKLEASVLSVCLSTQSSLYQIPESLGAAASTRVANELGAGNPKQARMNAVY<br>TAMVITGVESIMVGAIVFGARNVFGYLFSSSETEVVVDYVKSMAPLLSLSVIFDALH<br>AALSGVARGSGRQDIGAYVNLAAYYLFGIPTAILLAFGFKMRGRGLWIGITVGS<br>CVQAVLLGLIVILTNNWKKQARKARERVMGDEYEEKESEEEHEEYIS<br>MEDKIQSDDFTSHKNPTLPQVIEELKELWAMVLPITAMNCLVYVRVAVSVLFL<br>GRLGSLELAGGALSIGFTNITGYSVMVGLASGLEPVCQAYGSKNWDLLTSLH<br>RMVVILLMASLPISLLWINLGPIMLFMCQNPEITATAAEYCLYALPDLLTNTLLQ<br>PLRVYLRQRVTKPMMWCTLA AVAFHVPLNYWLV MVKHWGVPGVAIASVVT<br>NLIMVVLLVGYVWVSGMLQKRVSGDGDGGSTTMVAVVAQSSSMELVGGLG<br>PLMRVAVPSCLGICLEWVWYIEIVVMGGYLENPKLAVAATGILIQTSTLMYTVP<br>MALAGCVSARVGNELGAGRPYKARLAANVALACAFVVGALNVAWTVILKER<br>WAGLFTGYEPLKVLVASVMPIVGLCELGNCPQTTGCGILRGTGRPAVGAHVNL<br>GSFYFVGTPVAVGLAFWLKIGFSGLWFGLLSAQAAACVVSILYAVLARTDWEGE<br>AVKAMRLTSLEMRKVGQDEESSLLLLDDEKLGDVL<br>MEDGVTPLLLITEKDTTMIRVKEEVKKQLWLSAPLIGVSLLQYSLQVISVMFVGH<br>LGSLPLSAASIATSFASVTGFTFLLGTASALETLCGQAYGAKLYGKLGIQMORA<br>MFVLLILSVPLSIIWANTEQILVLVHQDKSIASVAGSYAKYMIPSLFAYGLLQCIN<br>RFLQAQNNVFPVFVCSGITTC LHLLLCWLFVLKTGLGYRGAAL AISVSYWFNVI<br>LLSCYVKFSPSCSHSWTGFSKEAFQELYDFSKIAFPSAVMVCELWSFELLVLASG<br>LLPNPVLETSVLSICLNTSLTIWQISVGLGGAASIRVSNELGAGNPQVAKLAVYV<br>IVGIAVAEGIVVTVLLSIRKILGHAFSSDPKIIAYAASMIPIVACGNFLDGLQCVL<br>SGVARGCGWQKIGACVNLGSYLVGVPLGLLGFHFHIGGRGLWLGIVTALSV<br>QVLCLSLVTIFTNWDKEAKKATNRVGSSDDKDGDVQ<br>MEEPFLLRDELLVPSQVTWHTNPLTVELKRVSRLAAPMATVTIAQYLLPVISVM<br>VAGHNDELQLSGVALANSFTNVTGFSIMCGLVGALETLCGQAYGAKQYEKIGT<br>YAYSAIASNIPICFLISILWLYIEKILISLGQDPEISRIAGSYAFWLIPALFGQAIVIP<br>SRFLLTQGLVIPLLF TAVTTLLFHVLCWTLVFLFGLGCNGPAMATSVSFWFYA<br>VILSCYVRFSSSCEKTRGFVSRDFVSSIKQFFQYGIPSAAMICLEWWLFEILILCSGL<br>LPNPKLETSVLSICLTIETLHYVISAGVAAAVSTRVSNNLGAGNPQVARVSVLAG<br>LCLWIVESAFFSILLFTCRNIIGYAFSNSKEVLDYVADLTPLLCLSFILDGFTA VLN<br>GVARGSGWQHIGAWNNTVSYYLVGAPVGIYLAFSRELNGKGLWCGVVVGSTV |
| AT1G7<br>1140 |                                                                                                                                                                                                                                                                                                                                                                                                                                                                                                                                                                                                                                                                                                                                                                                                                                                                                                                                                                                                                                                                                                                                                                                                                                                                                                                                                                                                                                                                                                                                                                                                                                                                                                                                                                                                                                                                                                                                                                                                                                                                                                                                                                                                                                                                                                                                                                                                                                                                                                                                                                                                                       |
| AT1G7<br>1870 |                                                                                                                                                                                                                                                                                                                                                                                                                                                                                                                                                                                                                                                                                                                                                                                                                                                                                                                                                                                                                                                                                                                                                                                                                                                                                                                                                                                                                                                                                                                                                                                                                                                                                                                                                                                                                                                                                                                                                                                                                                                                                                                                                                                                                                                                                                                                                                                                                                                                                                                                                                                                                       |
| AT1G7<br>3700 |                                                                                                                                                                                                                                                                                                                                                                                                                                                                                                                                                                                                                                                                                                                                                                                                                                                                                                                                                                                                                                                                                                                                                                                                                                                                                                                                                                                                                                                                                                                                                                                                                                                                                                                                                                                                                                                                                                                                                                                                                                                                                                                                                                                                                                                                                                                                                                                                                                                                                                                                                                                                                       |
| AT2G0<br>4040 |                                                                                                                                                                                                                                                                                                                                                                                                                                                                                                                                                                                                                                                                                                                                                                                                                                                                                                                                                                                                                                                                                                                                                                                                                                                                                                                                                                                                                                                                                                                                                                                                                                                                                                                                                                                                                                                                                                                                                                                                                                                                                                                                                                                                                                                                                                                                                                                                                                                                                                                                                                                                                       |



|               |                                                                                                                                                                                                                                                                                                                                                                                                                                                                                                                                                                                                            |
|---------------|------------------------------------------------------------------------------------------------------------------------------------------------------------------------------------------------------------------------------------------------------------------------------------------------------------------------------------------------------------------------------------------------------------------------------------------------------------------------------------------------------------------------------------------------------------------------------------------------------------|
| AT2G0<br>4050 | <p>QATILAIVTASINWKEQAEKARKRIVSTENRLA</p> <p>MEEPFLQDEHLVPCKDTWKSGQVTVELKKVSSLAAPMAAVTIAQYLLPVISV</p> <p>MVAGHNGELQLSGVALATSFTNVSGFSILFGLAGALETLCGQAYGAKQYEKIG</p> <p>TYTYSATASNIPICVLISVLWIYIEKLLISLGQDPDISRVAGSYALWLIPALFAHAFF</p> <p>IPLTRFLLAQGLVLPALLYCTLTTLLFHIPVCWAFVYAFGLGSNGAAMASVSFWF</p> <p>YVILSCYVRYSSCDKTRVSVSSDFVSCIKQFFHFGVPSAAMVCLEWWLFELLIL</p> <p>CSGLLPNPKLETSVLSICLTATSLHYVIPGGVAAAVSTRVSNKLGAGIPQVARVS</p> <p>VLGLCLWLVESAFFSTLLFTCRNIIGYAFSNSKEVVDYVANLTPLLCLSFILDGF</p> <p>TAVLNGVARGSGWQHIGALNNVVAYYLVGAPVGVYLA FNRELNGKGLWCG</p> <p>VVVGSAVQAII LAFTASINWKEQAEKARKRMVSSSENRLA</p> |
| AT2G0<br>4070 | <p>MEEPFLPQDEQIVPCKATWKSGQLNVELKKVSRLAVPMATVTIAQYLLPVISM</p> <p>VAGHNGELQLSGVALATSFTNVSGFSIMFGLVGSLETLSGQAYGAKQYKMG</p> <p>YTSAISSNIPICVLISILWIYMEKLLISLGQDPDISRVAGSYALRLIPTLFAHAIVLP</p> <p>LTRFLLAQGLVLPALLYFALTLLFHIAVCWTLVSALGLGSNGAALASVSFWFFA</p> <p>MTLSCYVRFSSSCEKTRRFVSQDFLSSVKQFFRYGVPSAAMLCLEWWLFELLILC</p> <p>SGLLQNPKLETSVLSICLTATLHYVIPVGVAAAVSTRVSNKLGAGIPQVARVSV</p> <p>LAGLCLWLVESSFFSILLFAFRNIIGYAFSNSKEVVDYVADLSPLLCLSFVLDGFT</p> <p>AVLNGVARGCGWQHIGALNNVVAYYLVGAPVGIYLA FSCELNGKGLWCGVV</p> <p>VGSAVQAII LAIVTASMNWKEQAKKARKRLISSENGLA</p>                                            |
| AT2G0<br>4080 | <p>MEEPFLPRDEQLVSCSTWQSGQVTVELKKVSRLAAPMATVTIAQYLLPVISM</p> <p>VAGHIGELELAGVALATSFTNVSGFSIMFGLVGALETLCGQAYGAEQYEKIGTY</p> <p>TYSAMASNIPICFIISILWIYIEKLLITLGQEPDISRVAGSYSLWLVPALFAHAIFLPL</p> <p>TRFLLAQGLVISLLYSAMTTLLFHIAVCWTLVFALGLGSNGAAIAISLSFWFYAVI</p> <p>LSCHVRFFSSCEKTRGFVSNDFMSSIKQYFQYGVPSAGLICLEWWLFELLILCSGL</p> <p>LPNPKLETSVLSICLTIGTLHYVIPSGVAAAVSTRVSNKLGAGNPQVARVSVLAG</p> <p>LCLWLVESAFFSTLLFTCRNIIGYTFSNSKEVVDYVADISPLLCLSFILDGLTAVLN</p> <p>GVARGCGWQHIGALINVVAYYLVGAPVGVYLA FSREWNGKGLWCGVMVGS</p> <p>AVQATLLAIVTASMNWKEQAEKARKRIISTENGLV</p>                                         |
| AT2G0<br>4090 | <p>MEDPLLLGDDQLITRNLKSTPTWWMNFTAELKNVSSMAAPMATVTVSQYLLP</p> <p>VISMVAGHCGELQLSGVTLATAFANVSGFGIMYGLVGALETLCGQAYGAKQ</p> <p>YTKIGTYTFSIAVSNVPIVVLISILWFYMDKLFVSLGQDPDISKVAGSYAVCLIPAL</p> <p>LAQAVQQPLTRFLQTQGLVLPALLYCAITTTLLFHIPVCLILVYAFGLGSNGAALAI</p> <p>GLSYWFNVLILALYVRFSSACEKTRGFVSDDFVLSVKQFFQYGIPSAAMTTIEWS</p> <p>LFELLILSSGLLPNPKLETSVLSICLTSSSLHCVIPMGIGAAGSTRISNELGAGNPE</p> <p>VARLAVFAGIFLWFLEATICSTLLFTCKNIFGYAFSNSKEVVDYVTELSLLCLSF</p> <p>MVDGFSSVLDGVARGSGWQNGAWANVVAYYLLGAPVGGFLGFWGHMNGK</p> <p>GLWIGVIVGSTAQGI LAIVTACLSWEEQAAKARERIVGRTLE</p>                                        |
| AT2G0<br>4100 | <p>MEDPLLLGDNQIITGSLKPTPTWRMNFTAELKNLSRMALPMATVTVQAQYLLPV</p> <p>ISMVAGHRSELQLSGVALATSFTNVSGFSVMFGLAGALETLCGQAYGAKQYA</p> <p>KIGTYTFSIAVSNVPIVVLISILWFYMDKLFVSLGQDPDISKVAGSYAVCLIPALLA</p> <p>QAVQQPLTRFLQTQGLVLPALLYCAITTTLLFHIPVCLILVYAFGLGSNGAALAI</p> <p>GLSYWFNVLILALYVRFSSSCEKTRGFVSDDFVLSVKQFFQYGIPSAAMTTIEWSLFE</p> <p>FLILSSGLLPNPKLETSVLSICLTSSSLHYVIPMGIGAAGSIRVSNELGAGNPEVAR</p> <p>LAVFAGIFLWFLEATICSTLLFICRDIFGYAFSNSKEVVDYVTELSPLLCLSFVLDGF</p>                                                                                                                                             |

|               |                                                                                                                                                                                                                                                                                                                                                                                                                                                                                                                                                                                                                                                                                                                                                          |
|---------------|----------------------------------------------------------------------------------------------------------------------------------------------------------------------------------------------------------------------------------------------------------------------------------------------------------------------------------------------------------------------------------------------------------------------------------------------------------------------------------------------------------------------------------------------------------------------------------------------------------------------------------------------------------------------------------------------------------------------------------------------------------|
| AT2G2<br>1340 | <p>SAVLGGVARGSGWQHIGAWANVVAYYLLGAPVGLFLGFWCHMNGKGLWIG<br/> VVVGSTAQGIILAIVTACMSWNEQAAKARQRIVVRTSSFGNGLA<br/> MQIQCKTLTFTVSSIPCNPKLPFPSSLTLRSWNPSFSPFRSSAVSGPKSSLKLNRF<br/> RNCASNQELVVDGETGNNGSISELQGDAANGSISPVEVEAEVEEVKVDLATQ<br/> SIWGQMKEIVMFTGPAAGLWLCGPLMSLIDTAVIGQGSSLELAALGPATVICDY<br/> LCYTFMFLSVATSNLVATSLARQDKDEVQHQSILLFIGLACGVTMMVLTRLFGS<br/> WALTAFTGVKNADIVPAANKYVQIRGLAWPAVLIGWVAQSASLGMKDSWGP<br/> LKALAVASAINGVGDVVLCTFLGYGIAGAAWATMVSQVVAAYMMMDALNK<br/> KGYSAFSFCVPSPSELLTIFGLAAPVFITMMSKVLFYTLLVYFATSMGTNIIAAHQ<br/> VMLQIYTMSTVWGEPLSQTAAQSFMPPELLFGINRNLPKARVLLKSLVIIATLGI<br/> VGTIGTAVPWLFPGIFTRDKVVTSEMCHKVIIPYFLALSITPSTHSLEGTLLAGRDL<br/> RYISLSMTGCLAVAGLLMLLSNGGFGLRGCWYALVGFWARFSLSLFRLLSRD<br/> GVLYSEDTSRYAEKVKAA</p> |
| AT2G3<br>4360 | <p>MREEREDMLSWPLIGEKEKRSRFVKEEVEKQLLLSGPLIAVSLLQFCLQIISVMFV<br/> GHLGSLPLSAASIATSFASVTGFTFLMGTASAMDTVCGQSYGAKMYGMLGIQM<br/> QRAMLVLTLLSVPLSIVWANTEHFLVFFGQDKSIAHLSGSYARFMIPSIFAYGLL<br/> QCLNRFLQAQNNVIPVVICSGVTTSLHVIICWVLVLKSGLGFRGAAVANAISYW<br/> LNVILLSCYVKFSPSCSLTWTGFSKEARRDIIPFMKLVIPSAFMVCSLEMWSFELL<br/> VLSSGLLPNPVLETSCPRTVWMIPFGLSGAASTRVSNELGSGNPKGAKLAVRVV<br/> LSFSIVESILVGTVLILIRKIWGFAYSSDPEVVSHVASMLPILALGHSLDSFQTVLSC<br/> VARGCGWQKIGAFVNLGSYYLVGVPFGLLLGFHFHVGGRLWLGIICALIVQG<br/> VCLSLITFFTNDWDEEVKKATSRAKSSSEVKEFAVDNGSILV</p>                                                                                                                                                                                                  |
| AT2G3<br>8330 | <p>MAAVATSFCFSPHRSPSRFGNPNSSIRRTIVCKSSPRDESPAVSTSSQRPEKQQNP<br/> LTSQNKPDHDKPDGIGKIGMEIMSIALPAALALAADPITSLVDTAFAVGHIGS<br/> AELAAVGVSVSFNLVSKLFNVPLLNVTTSFVAEEQAIKDDNDNDIETSKKVL<br/> PSVSTSLVLAAGVGIAEAIASLGSDFLMDVMAIPFDSPMRIPAEQFLRLRAYGA<br/> PPIVVALAAQGAFRGFKDTTTPLYAVVAGNVLNAVLDPILIFVLGFGISGAAAA<br/> TVISEYLIAFILLWKLNNENVLLSPQIKVGRANQYLKSGGLLIGRTVALLVPFTLA<br/> TSLAAQNGPTQMAGHQIVLEIWLAVSLLTDALAIQAQSLATTYSQGEYKQAR<br/> EVLFGLVQVGLATGTGLAAVLFITFEFSSSLFTTDSEVLKIALSGTLFVAGSQPVN<br/> ALAFVLDGLYYGVSDFGFAAYSMVIVGFISSLFMLVAAPTFLAGIWTGLFLFM<br/> ALRLVAGAWRLGTRTGPKWMLWSAPEKPE</p>                                                                                                                                                         |
| AT2G3<br>8510 | <p>MQVGEEMASLTKIACPIVMTSLLIFSRSIISMWFLSHLGKVELAGGALAMGFGNI<br/> TGVSVLKGLSVGMDPICGQAFGAKRWTVLSTHTFQKMFCLLIVSVPIAVTWLNI<br/> EPIFLRLGQDPDITKVAKTYMLFFVPELLAQAMLHPLRTFLRTQGLTSPLTISAIV<br/> SILLHPLFNYVFVVRMRLGVKGVAIAMAFNTMNIDVGLLVYTCFSDSLIKPWEG<br/> LALRSLFRGWWPILLSLAAPSAISVCLEYWWYEIMLFLCGLLGNPKASVAAMGIL<br/> IQTGILYVVPFAISSAIATRVGHALGGGQPTRAQCTTVIGLILAVAYGLAAAVF<br/> VTALRSVWGKMFTDEPEILGLISAALPILGLCEIGNSPQTAACGVLGTARPKDG<br/> ARVNLCAFYIVGLPVAVTTTTFGFKVGFRGLWFGLLSAQMTCLVMMLYTLIRTD<br/> WSHQVKRAEELTSAADKSHSEDETVAEVDQDDDDVSSNDLEIGLLQNTN</p>                                                                                                                                                                                             |
| AT3G0<br>3620 | <p>MSTQEEMEERLLREGSDAEGQSNNRESIYLRTKVWSEVNKMWRIALPSSLFRMT<br/> SFGSIIVAQAFIGHSELGLAAYALLQSTFIRFLYGLMGGMSSATETLCGQAYGA<br/> EQYHTMGIYLRQSWIVDMAVTTTLFPLFIVLAGPILRLLGQNVEITKTVDIYPWM</p>                                                                                                                                                                                                                                                                                                                                                                                                                                                                                                                                                                   |

---

IPYVYSLIFTMTIQMYLQAQMRNAIVGVLSTLSLALDLVVTWVCVSMGMGIG  
 GALLGLNVGSWAMVLAEFVYIFGGWCPFTWTGFSIAAFVDLIPMLKLSISSGFM  
 ICLEYWYMSILVLMAGYTKDAKIAISAFSICQYIYTWELNICLGFLGAACVRVAN  
 ELGKGAHAHVRFSIKVILTISTLMGVIFSALCLAFCGRISYLFNSNSDEVSDAVNDL  
 SVILAVSILLNSIQPILSGVAVGAGMQSIVAVVNLASYYAIGIPLGLILTYVFHLGV  
 KGLWSGMLAGIAIQTIILCYIYKTDWELEVKRTCERMKVWSLKPSNEESNPIIRE  
 ESRSK  
 MTETGDDLATVKKPIPFVLVIFKDLRHVFSRDTTGREILGIAFPAALALAADPIASL  
 IDTAFVGRLGAVQLAAVGVSAIFNQASRITIFPLVSLTTSFVAEEDTMEKMKEE  
 ANKANLVHAETILVQDSLEKGISSPTSNDTNQPQQPPAPDTKSNSGNKSNKKE  
 KRTIRTASTAMILGLILGLVQAIFLIFSKLLLGVMGVKPNPMLSPAHKYLSIRA  
 AT3G0 LGAPALLLSLAMQGIFRGFKDTKTPLFATVVADVINVLDPIFIFVLRGLIIGAAIA  
 8040 HVISQYFMTLILFVFLAKKVNLIPPNFGDLQFGRFLKNGLLLLARTIAVTFCQTL  
 AAAMAARLGTTTPMAAFQICLQVWLTSLLNDGLAVAGQAILACSFAEKDYNK  
 VTAVASRVLQMGFVLGLGLSVFVGLGLYFGAGVFSKDPAVIHLMAIGIPFIAAT  
 QPINSALFVL DGVNFGASDFAYTAYSMVGVA AISIAAVIYMAKTNGFIGIWIALT  
 IYMALRAITGIARMATGTGPWRFLRGRSSSSSS  
 MDSSPNDGVHQPLLHPQSPSPPESTNGELETVLSDVETPLFLRLRKATIIESKLL  
 FNLAAPAVIVYMINYLMSMSTQIFSGHLGNLELAAASLGNTGIQVFAYGLMLG  
 MGSAVETLCCQAYGGRKYEMLGYYLQRSTVLLTLTGLLLTLIYVFSEPIILLFLGE  
 SPAIASAASLFVYGLIPQIFAYAANFPIQKFLQSQSIVAPSAYISTATLFVHLLLSW  
 AT3G2 LAVYKLGMLLGASLVLSLWWIIVVAQFVYIVTSECRETWRGFSVQAFSGLW  
 1690 SFFKLSAASAVMLCLETWYFQILVLLAGLLENPELALDSLICMTISGWVFMISV  
 GFNAAISVRVSNELGAGNPKSAAFSVIIVNIYSLITCVILAIVILACRDVLSYAFTE  
 GKEVSDAVSDLCPLLAVTLVLNGIQPVLSGVAVGCGWQTFVAKVNVGCYYIIGI  
 PLGALFGFYFNFGAKGIWTGMIGGTVIQTFILAWVTFRTDWTKEVEEASKRLDK  
 WSNKKQEVVPE  
 MADPTSKDDHDGEGGRDKSSTFVQKLIDVEEAKTQIIYSLPMIFTNLFYYCIPLTS  
 VMFASQLGQLELAGATLANSWATVTGFAFMTGLSGALETLCGQGFGAKSYRM  
 LGIHLQSSCIVSLVFTILITILWFFTESVFLLLRQDPSISKQAALYMKYLAPGLLAY  
 AT3G2 GFLQNILRFCQTQCIVTPLVLFSFLPLVINIGTTYALVHLAGLGFIGAPIATSISLWI  
 3550 AFVSLGFYVICSDKFKETWTGFSMESFHHVVLNLTLSIPSAAMVCLEYWAFEILV  
 FLAGLMRNPEITTSLSVAICVNTEISYMLTCGLSAATSTRVSNELGAGNVKGAK  
 KATSVSVKLSLVLALGVVAILVGHDAWVGLFSNSHVIKEGFASLRFFLAASITL  
 DSIQGVLSGVARGCGWQRLATVINLGTFFYLIGMPISVLCGFKLKLHAKGLWIGL  
 ICGMFCQSASLLMTIFRKWTKLTAATV  
 MADPATSSPLDDHVGGEDERGRRSRSSTLVQKVIDVEEAKAQMIYSLPMILT  
 NLFYYCIPITSVMFASHLGQLELAGATLANSWATVSGFAFMVGLSGSLETLCGQG  
 FGAKRYRMLGVHLQSSCIVSLVFSILITIFWFFTESIFGLLRQDPSISKQAALYMKY  
 AT3G2 QAPGLLAYGFLQNILRFCQTQSIIAPLVFSFVPLVINIATAYVLVYVAGLGFIGAP  
 3560 IATSISLWIAFLSLGTYVMCSEKFKETWTGFSLESFRYIVINLTLSLPSAAMVCLEY  
 WAFEILVFLAGVMPNPEINTSLVAICVNTEAISYMLTYGLSAAASTRVSNELGA  
 GNVKGAKKATSVSVKLSLVLALGVVIVLLVGHDWVGLFSDSYVIKEEFASLRF  
 FLAASITLDSIQGVLSGVARGCGWQRLVTVINLATFYLIGMPIAAFCGFKLKFYA

---

---

|       |                                                           |
|-------|-----------------------------------------------------------|
|       | KGLWIGLICGIFCQSSSLLMTIFRKWTKLNVATV                        |
|       | MAKDKDITETLLTAAEERSDLPFLSVDDIPPITTVGGFVREFNVETKKLWYLAGP   |
|       | AIFTSVNQYSLGAITQVFAGHISTIALAAVSVENSVVAGFSFGIMLGMGSALETL   |
|       | CGQAFGAGKLSMLGVYLQRSWVILNVTALILSLLYIFAAPILASIGQTAAISSAA   |
|       | GIFSIYMIPQIFAYAINFPTAKFLQSQSKIMVMAVISAVALVIHVPLTWVIVKLQ   |
| AT3G2 | WGMPGLAVVLNASWCFIDMAQLVYIFSGTCGEAWSGFSWEAFHNLWSFVRLS      |
| 6590  | LASAVMLCLEVWYFMAIILFAGYLKNAEISVAALSICMNLGWTAMIAIGMNT      |
|       | AVSVRVSNELGANHPRTAKFSLLVAVITSTLIGFIVSMILLIFRDQYPSLFVKDEK  |
|       | VILVKELTPILALSIVINNVPVLSGVAVGAGWQAVVAYVNIACYVVFQIPFGL     |
|       | LLGYKLNYGVMGIWCGMLTGTVVQTVLVTWMICKTNWDTEASMAEDRIREW       |
|       | GGEVSEIKQLIN                                              |
|       | MSSTETYEPLLTRLHSDSQITERSSPEIEEFLRRRGSTVTPRWWLKLAVWESKLLW  |
|       | TLGSASIVSVLNYMLSFTVMFTGHLGSLQLAGASIATVGIQGLAYGIMLGMA      |
|       | SAVQTVCGQAYGARQYSSMGIICQRAMVLHLAAAVFLTFLYWYSGPILKTMGQ     |
|       | SVAIAHEGQIFARGMIPQIYAFALACPMQRFLQAQNIVNPLAYMSLGVFLLHTL    |
| AT3G5 | LTWLVTNVLDFGLLGAALILSFSWWLLVAVNGMYILMSPNCKETWTGFSTRAF     |
| 9030  | RGIWPFYFKLTVASAVMLCLEIWYNQGLVIISGLLSNPTISLDAISICMYLNDWM   |
|       | QFMLGLSAAISVRVSNELGAGNPRVAMLSVVVVNITTVLISVLCVIVLVFRVGL    |
|       | SKAFTSDAEVIAAVSDLFPLLAVSIFLNGIQPILSGVAIGSGWQAVVAYVNLVTY   |
|       | YVIGLPIGCVLGFKTSLGVAGIWWGMIAGVILQTLTLIVLTLKTNWTSEVENAA    |
|       | QRVKTSATENQEMANAGV                                        |
|       | MEIPVREERRSSSSSAGPLQQTISLAADDAIDSGPSSPLVVKVSVFETEHETTKLIH |
|       | APSTLLGETTGDADFPPIQSFRDAKLVCVNETSKLWEIAAPIAFNILCNYGVNSF   |
|       | TSIFVGHIGDLELSAVAIALSVVSNFSFGFLGMASALETLCGQAFGAGQMDML     |
|       | GVYMQRSWLILLGTSVCLLPYIYATPLLLLLGQEPEIAEISGKFTTQIIPQMFALAI |
| AT4G0 | NFPTQKFLQSQSKVGIMAWIGFFALT LHIFILYLFINVFKWGLNGAAA AFDVSA  |
| 0350  | WGIAIAQVYVVGWCKDGWKGLSWLAFQDVWPFLKLSFASAVMLCLEIWYF        |
|       | MTIIVLTGHLEDPVIAVGSLICMNINGWEGMLFIGINAAISVRVSNELGSGHPR    |
|       | AAKYSVIVTVIESLVIGVVCAIVILITRDDFAVIFTESEEMRKAVADLAYLLGITMI |
|       | LNSLQPVISGVAVGGGWQAPVAYINLFCYYAFGLPLGFLGKYKTS LGVQGIWIG   |
|       | MICGTSLQTLILLYMIYITNWNKEVEQASERMKQWGAGYEKLEKIAT           |
|       | MNGSNETVERRIELRRPLVDTEKKLPLEVGLESVLTESSLPYRRRVYLGMCIELKL  |
|       | LLRLALPAILVYLINGGMGISARIFAGHLGSTQLAAASIGNSSFSVLVYALMLGMG  |
|       | SAVETLCGQAYGAHRYEMLGIYLQRATIVLALVGFPMTILYTFSYPILLLLGEPKT  |
|       | VSYMGSLYIAGLIPQIFAYAVYFTAQKFLQAQSVVAPSAYISAAALVLQISLTWIT  |
| AT4G2 | VYAMGQGLMGIAVYVLTISWWFIVGAQTFYVITSVRFKDTWTGFSWKS LHGLWS   |
| 1903  | FFKLSAGSAVMICLELWYTQILVLLAGLLKDPALSLDSLCSISALSFMVSVGF     |
|       | NAAVSVRTSNELGAGNPKSALFSTWTATFVSFVISVVEALVVIASRDNVSYIFTS   |
|       | DADVAKAVSDLCPLAVTHILNGIQPVLSGVAVGCGWQTYVAYVNIGCYIYVGI     |
|       | PIGCILGFTFNFQAKGIWTGMIGGTLMQTLILLYVITYQADWDKEVMLHEIKLKK   |
|       | RESDWICGTTKSLSRISNFVMK                                    |
| AT4G2 | MEVPSETTNLADLRRPLVVPVVSERKPPADVGLGLESVLTERSLPYRRRVYLGA    |
| 1910  | CIEMKLLFRLALPAILVYLVNSGMGISARIFAGHLGKNELAAASIGNSCFSLVYG   |
|       | LMLGMGSAVETLCGQAYGAHRYEMLGIYLQRATIVLALVGLPMTLLYTFSYPIL    |

---

---

|               |                                                                                                                                                                                                                                                                                                                                                                                                                                                                                                                                                                                                                                                                                                                                                                                                                                                                                                                                                                                                                                                                                                                                                                                                                                                                                                                                                                                                                                                                                                                                                                                                                                                                                                                                                                                                                                                                                                                                                                                                                                                                                                                                                                                                                                                                                                                                                                                                                                                                                                                                                              |
|---------------|--------------------------------------------------------------------------------------------------------------------------------------------------------------------------------------------------------------------------------------------------------------------------------------------------------------------------------------------------------------------------------------------------------------------------------------------------------------------------------------------------------------------------------------------------------------------------------------------------------------------------------------------------------------------------------------------------------------------------------------------------------------------------------------------------------------------------------------------------------------------------------------------------------------------------------------------------------------------------------------------------------------------------------------------------------------------------------------------------------------------------------------------------------------------------------------------------------------------------------------------------------------------------------------------------------------------------------------------------------------------------------------------------------------------------------------------------------------------------------------------------------------------------------------------------------------------------------------------------------------------------------------------------------------------------------------------------------------------------------------------------------------------------------------------------------------------------------------------------------------------------------------------------------------------------------------------------------------------------------------------------------------------------------------------------------------------------------------------------------------------------------------------------------------------------------------------------------------------------------------------------------------------------------------------------------------------------------------------------------------------------------------------------------------------------------------------------------------------------------------------------------------------------------------------------------------|
|               | ILLGEPKTVSYMGSKYIAGLIPQIFAYAVNFTAQKFLQAQSVVAPSAFISAAALIL<br>QILLTWITVYVMDMGFMGIAYYLTISWWVIVGSQCFYIAVSPKFRHTWTGLSW<br>RSLQGLWSFFKLSAGSAVMICLEMWYSQILVLLAGLLENPARSLDSLSICMSISA<br>LSFMVSVGFNAAVSVRTSNELGAGNPKSAWFSTWTATFVSFVISVTEALAVIWF<br>RDYVSYIFTEDADVAKAVSDLCPLAITIILNGIQPVLSGVAVGCGWQTYVAYV<br>NVGCYYVVGIPVGCILGFTFDFQAKGIWTGMIGGTLMQTLILLYVITYRTDWDKE<br>VMLHEIKWKKRGNVWICGTTRRSLSKTSYNKFGGVIDNKEKEISVVCAGDFNV<br>RSFSWLLCLFYGNRTIKIYFCLMDYSLFTKSCS<br>MSETSKSESLDPEVSEGLCSKTLMQSIVHELKLQMRIGLPLVVMNLLWFGKMTT<br>TSVFLGRQGELNLAGGSLGFSFANVTGFSVLYGISAAMEPICGQAFGAKNFKLL<br>HKTLFMAVLLLLLLISVPISFLWLNHVKILTGFQREDISFIAKKYLLYLLPELPILSF<br>LCPLKAYLSSQGVTLPIMFTTAAATSLHIPINIVLSKARGIEGVAMAVWITDFIVV<br>ILLTGYVIVVERMKENKWKQGGWLNQSAQDWLTLIKLSGPCCLTVCLEWWCY<br>EILVLLTGRLPNPVQAVSILIIVFNFYLLYAVMLSLGTCVATRVSNELGANNPK<br>GAYRAAYTTLIVGIISGCIGALVMIAFRGFWGSLYTHHDQLILNGVKKMMLIMA<br>VIEVVNFPLMVCGEIVRGTAKPSLGMYANLSGFYLLALPLGATLAFKAKQGLQ<br>GFLIGLVFGISLCLSILLIFIARIDWEKEAGKAQILTCNTEDEQTSQSGSQDSHS<br>MAAPLLMIKNQTDHRQDPNPNPHTLSSSIQEAKSIKISLPLILTGLLLYSRSMIS<br>MLFLGRLNDLSALSGGSLALGFANITGYSLLSGLSIGMEPICVQAFGAKRFKLLG<br>LALQRTTLLLLLLCSLPISILWLNKILLFFGQDEEISNQAEIFILFSLPDLILQSFLH<br>PIRIYLRQSITLPLTYSAFFAVLLHIPINYLLVSSLGLGLKGVALGAIWTNVNLLG<br>FLIIYIVFSGVYQKTWGGFSMDCKGWRSLMKLAIPSCVSVCLEWWWYEIMILL<br>CGLLLNPQATVASMGIQTTALIIYFSSLSISVSTRVGNELGANQPKARIAAR<br>TGLSLSLGLGLLAMFFALMVRNCWARLFTDEEEIVKLTSMLPIIGLCELGNCP<br>QTTLGVLRGSAKPKLGANINLCCFYFVGMPVAVWLSFFSGFDFKGLWLGLFA<br>AQGSCLISMLVVLARTDWEVEVHRAKELMTRSCDGEDDDGNTPFLLDSLIDIEE<br>NLVF<br>MDPTAPLLTHGGEVEEDYAPARSWTDVKRVLSTESAKLWMIAAPVGFNIICQY<br>GVSSVTNIFVGHIGEVELSAVSISLSVIGTFSFGFLLGMGSALETLCGQAYGAGQV<br>NMLGVYMQRSWIILFVSCFFLLPIYIFATPVLRLLGQAEIIVPAGQFTLLTIPQLF<br>SLAFNFPTSKFLQAQSKVVAIAWIGFVALSLHVIMLWLFIIIEFGWGTNGAALAF<br>NITNWGTAAIAQIVYVIGWCNEGWTGLSWLAFKEIWAFFVRLSIASAVMLCLEIW<br>YMMSIIVLTGRLDNAVIAVDSLICMNINGLEAMLFIGNAAISVRVSNELGLGR<br>PRAAKYSVYVTVFQSLIGLVFMVAIIHARDHFAIIFTSSKVLQRAVSKLAYLLGIT<br>MVLNSVQPVVSGVAVGGGWQGLVAYINLGCYYIFGLPFGYLLGYIANFGVMG<br>LWSGMIAGTALQTTTTLLIVLYKTNWNKEVEETMERMKKWGGSETTSKDILASG<br>WPSGLRRQTQVLVFRGRGFKPHF<br>MCNPSTTTTTTGSSENQESRTGLFLDLFSINSFEPTKRNLRHCCENRGSPMAEAVT<br>EAKSLFTLAFPIAVTALVLYLRSVSMFFLGQLGDLELAAGSLAIAFANITGYSVL<br>SGLALGMEPLCSQAFAHFRKLLSLTLHRTVVFLVCCVPISVLWFNVGKISVYL<br>HQDPDIAKLAQTYLIFSLPDLTNTLLHPIRIYLRAQGIIHPVTLASLSGAVFHLP<br>ANLFLVSYLRLGLTGVAVASSITNIFVVAFLVCYVWASGLHAPTWTDPTRDCFR<br>GWAPLLRLAGPSCVSVCLEWWWYEIMIVLCGLLVNPRSTVAAMGVLIQTTSFL<br>YVFPSSLSFAVSTRVGNELGANRPKTAKLTATVAIVFAAVTGIIAAAFAYSVRNA |
| AT4G2<br>2790 |                                                                                                                                                                                                                                                                                                                                                                                                                                                                                                                                                                                                                                                                                                                                                                                                                                                                                                                                                                                                                                                                                                                                                                                                                                                                                                                                                                                                                                                                                                                                                                                                                                                                                                                                                                                                                                                                                                                                                                                                                                                                                                                                                                                                                                                                                                                                                                                                                                                                                                                                                              |
| AT4G2<br>3030 |                                                                                                                                                                                                                                                                                                                                                                                                                                                                                                                                                                                                                                                                                                                                                                                                                                                                                                                                                                                                                                                                                                                                                                                                                                                                                                                                                                                                                                                                                                                                                                                                                                                                                                                                                                                                                                                                                                                                                                                                                                                                                                                                                                                                                                                                                                                                                                                                                                                                                                                                                              |
| AT4G2<br>5640 |                                                                                                                                                                                                                                                                                                                                                                                                                                                                                                                                                                                                                                                                                                                                                                                                                                                                                                                                                                                                                                                                                                                                                                                                                                                                                                                                                                                                                                                                                                                                                                                                                                                                                                                                                                                                                                                                                                                                                                                                                                                                                                                                                                                                                                                                                                                                                                                                                                                                                                                                                              |
| AT4G2<br>9140 |                                                                                                                                                                                                                                                                                                                                                                                                                                                                                                                                                                                                                                                                                                                                                                                                                                                                                                                                                                                                                                                                                                                                                                                                                                                                                                                                                                                                                                                                                                                                                                                                                                                                                                                                                                                                                                                                                                                                                                                                                                                                                                                                                                                                                                                                                                                                                                                                                                                                                                                                                              |

---

|               |                                                                                                                                                                                                                                                                                                                                                                                                                                                                                                                                                                                                                                                                                                                                                                                                                                                                                                                                                                                                                                                                                    |
|---------------|------------------------------------------------------------------------------------------------------------------------------------------------------------------------------------------------------------------------------------------------------------------------------------------------------------------------------------------------------------------------------------------------------------------------------------------------------------------------------------------------------------------------------------------------------------------------------------------------------------------------------------------------------------------------------------------------------------------------------------------------------------------------------------------------------------------------------------------------------------------------------------------------------------------------------------------------------------------------------------------------------------------------------------------------------------------------------------|
| AT4G3<br>8380 | <p>WGRIFTGDKEILQLTAAALPILGLCEIGNCPQTVGCGVVRGTARPSTAANVNLG<br/> AFYLVGMPVAVGLGFWAGIGFNGLWVGLLAAQISCAGLMMYVVGTTDWESE<br/> AKKAQTLTCAETVENDIIKAVVASTIDGECDEAEPLIRITVLY<br/> MESSRVVVGGLPLANRRNSSFAKPKIQQGTFLPLSRINNV SAPQKCSLHTNPN<br/> PMFPFVTRRKSQTNPD CGVVKLGEEDDSCSSLDKLPEVNGVHTGVARPVDIKR<br/> ELVMSLSLPAIAGQAIDPLTLLMETAYIGRLGSVELGSAGVSMAIFNTISKLFNIPL<br/> LSVATSFVAEDIAKIAAQDLASEDSQSDIPSQGLPERKQLSSVSTALVLAIGIGIFE<br/> ALALSLASGPFLRLMGIQSMSEMFIPARQFLVLRALGAPAYVVS LALQGIFRGFK<br/> DTKTPVYCLGIGNFLAVFLFPLFIYKFRMGVAGAAISSVISQYTVAILMLILLNKR<br/> VILLPPKIGSLKFGDYLKSGGFVLGRTLSVLVTMTVATSMAARQGVFAMAAHQI<br/> CMQVWLAVSLLTDALASSGQALIASSASKRDFEGVKEVTTFVLKIGVVTGIALAI<br/> VLGMSFSSIAGLFSKDPEVLRIVRKGVLVFAATQPITALAFIFDGLHYGMSDFPY<br/> AACSM MVVGGISSAFMLYAPAGLGLSGVWVGLSMFMGLRMVAGFSRLMW RK<br/> GPWWFMHTSDKRLA<br/> MLIKSQRLTLFSPLLSKTRRIPVNSHQTLVAESVITRRTLGAITATPSFHKNPVVIR<br/> RRIKLERVTRNCVRIDREIDEEEEEEKERGDLVKQSIWEQMKEIVKFTGPAMG<br/> MWICGPLMSLIDTVVIGQGSSI ELAALGPGTVLCDHMSYVFMFLSVATS NMVAT<br/> SLAKQDKKEAQHQISVLLFIGLVCGLMMLLLTRLFGPWAVTAFTRGKNIEIVPA</p> |
| AT4G3<br>9030 | <p>ANKYIQIRGLAWPFILVGLVAQSASLGMKNSWGPKALAAATIINGLGDITLCL<br/> FLGQGIAGAAWATTASQIVSAYMMMDSLNKEGYNAYSFAIPSPQELWKISALA<br/> APVFISIFS KIAFYSFIIYCATSMGTHVLA AHQVMAQTYRMCNVWGEPLSQT AQ<br/> SFMPEMLYGANRNL PKARTLLKSLMIIGATLGLVLGVIGTAVPGLFPGVYTHDK<br/> VIISEMHRLLPFFMAL SALTMTVSLEGTLLAGRD LKFVSSVMSSSFIIGCLTLMFV<br/> TRSGYGLLG CWFVLVGFQWGRFGLYLRRLSPGGILNSDGPSPYTVEKIKSI<br/> MDKKSGGTKAIEEATVPLLECHNAAEEGGGMKREIW IETKKIWIYIVGPSIFTGL<br/> ATYSILIITQAFAGHLGDLELAAISIINNFTLG FNYGLLLGMA SALETLCGQAFGA<br/> REYYMLGVYMQRYWILFLCCILLP MYLFATPILKFIGQSDDIAELTG TIALWVI<br/> PVHFAFAFFFLNRFLQCQLKNKVIAISAGVSLAVHILVCWFFVYGYKLGIIGTM</p>                                                                                                                                                                                                                                                                                                                                                                                                                                              |
| AT5G1<br>0420 | <p>ASVNVPPWWLNIFILFLYSTRGGCTLTWTGFSSE AFTGLLELTKLSASSGIMLCLE<br/> NWYYKILMLMTGNLVNAKIAVDSL SICMSVNGWEMMIPLAFFAGTGVRVANE<br/> LGAGNGKGARFATIVSITLSLMIGLFFT VIIIVIFHDQIGSIFSSEAVLNAVDNLSV<br/> LLAFTVLLNSVQPVLSGVAVGSGWQSYVAYINLGCYYLIGLPFGLTMGWIFKFG<br/> VKGIWAGMIFGGTAIQTLILIIITTRCDWDNEAHKSSVRIKKWLVS DAGN<br/> MSGGGGEMEERLLNGSETEQRRESLYLRKKIWSEVRKMWRIALPSTLFRVMSFG<br/> CVVVAQAFIGHSSSETGLAAYALLQSTFIRFIYGIMAGMSSATETLCGQAYGAEQ<br/> YHMMGIYLRQSWIVDTFIATLFPFIVLAGPILRLLGQNVV ISETVDEIYPWVIPY<br/> LYSIVFTMTMQMYLQAQMKNAIIGILSTLALVLDIAATWWCVSVMGMGIHGA</p>                                                                                                                                                                                                                                                                                                                                                                                                                                                                                                                  |
| AT5G1<br>7700 | <p>LLGLNISSWSVAIAEFVYVFGGWCPHTWTGFS TAAFLDLIPMLKLSISSGFMLCL<br/> EYWYMSIIVLMSGYAKDANIAISAFSICQYIYSWEMNICFGLMGAACVRVANEL<br/> GKGDADAVRFSIKVVLVVS AVIGVICSALCLAFGGQISYLFSDSQAVSDAVADLS<br/> IVLSISILFNIIQPILSGVAIGAGMQSMVALVNLASYAIGVPLGVLLVYVFNFGIK<br/> GLWSGMLAGVG IQTLILCYVIYKTDWELEVKKTNERMKTWTLNLP AVQSTTIST<br/> RDEERK</p>                                                                                                                                                                                                                                                                                                                                                                                                                                                                                                                                                                                                                                                                                                                                                  |
| AT5G1         | <p>METPNIIISHTNLLSKIDLEKQNPAPIFPTITELKSEARSLFSLAFPTIL AALILYARS</p>                                                                                                                                                                                                                                                                                                                                                                                                                                                                                                                                                                                                                                                                                                                                                                                                                                                                                                                                                                                                                |

|               |                                                                                                                                                                                                                                                                                                                                                                                                                                                                                                                                                                                                                                                                                                                                                                                                                                                                                                                                                                                                                                                                                                                                                   |
|---------------|---------------------------------------------------------------------------------------------------------------------------------------------------------------------------------------------------------------------------------------------------------------------------------------------------------------------------------------------------------------------------------------------------------------------------------------------------------------------------------------------------------------------------------------------------------------------------------------------------------------------------------------------------------------------------------------------------------------------------------------------------------------------------------------------------------------------------------------------------------------------------------------------------------------------------------------------------------------------------------------------------------------------------------------------------------------------------------------------------------------------------------------------------|
| 9700          | <p> AISMLFLGHIGELELAGGSLAIAFANITGYSVLAGLALGMDPLCSQAFGAGRPK<br/> LLSLTLQRTVLFLLTSSVVIVALWLNLGKIMIYLHQDPSISLAQTYILCSIPDLLT<br/> NSFLHPLRIYLRAQGITSPLTLATLAGTIFHIPMNFLLVSYLGWGFMGVSMAAA<br/> ASNLLVVIFLVAHVWIAGLHQPTWTRPSSECFKDWGPVVTALPISCGVCLEW<br/> WWYEIMTVLCGLLIDPSTPVASMGILIQTTSLLYIFPSSLGLAVSTRVGNELGSNR<br/> PNKARLSAIVAVSFAGVMGLTASAFAGVSDVWGWIFTNDVAIIKLTAALPI<br/> LGLCELGNCPQTVGCGVVRGTARPSMAANINLGAFYLVGTPVAVGLTFWAAY<br/> GFCGLWVGLLAAQICCAAMMLYVVATTDWEKEAIRARKLTCTEGVDVVITTT<br/> QTNGDLSEPLIYVTVATD<br/> MEEDKILTETLLSAAEPPALPFSSVEDIPPITTVGGFVKEFNVEVKKLWYLAGPA<br/> IFMSITQYSLGAATQVFAGHISTIALAAVSVENSVIAGFSFGVMLGMGSALETLC<br/> GQAFGAGKLSMLGVYLQRSWVILNVTAVILSLLYIFAAPILAFIGQTPAISSATGI<br/> FSIYMIPQIFAYAVNYPTAKFLQSQSKIMVMAAISAVALVLHVLLTWVIEGLQ </p>                                                                                                                                                                                                                                                                                                                                                                         |
| AT5G3<br>8030 | <p> WGTAGLAVVLNASWWFIVVAQLVYIFSGTCGEAWSGFSWEAFHNLWSFVRLS<br/> LASAVMLCLEVWYLMNAVILFAGYLNKAEISVAALSICMNILGWTAMIAIGMNA<br/> AVSVRVSNELGAKHPRTAKFSLLVAVITSTVIGLAISIALIFRDKYPSLFVGDEEV<br/> IIVVKDLTPILAVSIVINNVPVLSGVAVGAGWQAVVAYVNIVCYVFGIPFGLL<br/> LGYKLNFGVMGIWCGMLTGTVVQTIVLTWMICRTNWDTEAAMAEGRIREW<br/> GEVSDQLLN<br/> MGERDDEAEGILEKAKIPLLDQNVAAEEENGINEIKKEIWLETKKLWRIVGPAIFTR<br/> VTNLIFFVITQAFAGHLGELELAASIVNNVHIGFNYSFIGMATALETLCGQAFG<br/> AKKYDMFGVYLQRSWIVLFLFSILLPLMYIFATPILKFMGQPDDIAELSGIISVWA<br/> IPTHFSFAFFFPINRFLQCQLKNSVIAISSGVSLVVHIFVCWLFVYVLELGVIGTIAT<br/> ANVSWWLNVFILFTYTTCCGGCPLTWTGFSMESFTRLWEFTKLSASSGIMVCLEN<br/> WYYRMLIVMTGNLEDARIDVDSMSICMSINGLEMMVPLAFFAGTSVRVANELG<br/> AGNGKRARFAMIISVTQSLIIGIIISVLIYFLLDQIGWMFSSSETVLKAVNNLSILLS<br/> FAILLNSVQPVLSGVAVGSGWQSLVAFINLGCYYFIGLPLGIVMGWMFKFGVK<br/> IWAGMIFGGTMVQTLILIFITMRCDWEKEAQNAKVRVNKWSVSDARK<br/> MVVEEDSRLINLQHKYNPTMPEVVEELKRIWDISFPVAAMSILNYLKNMTSVVC<br/> MGRGSLLELAGGALAIGFTNITGYSVLSGLATGMEPLCGQAIGSKNPSLASLTLK<br/> RTIFLLLLASLPISLLWLNLAFLMLMLRQQHDITRVASLYCSFSLPDLLANSFLHP<br/> LRIYLRCKGTTWPLMWCTLVSVLLHLPITAFFTFYISLGVPGVAVSSFLT NFISLSL </p> |
| AT5G4<br>4050 | <p> LLCYIYLENNNNNDKTTSKSLCLDTPLMLYGSRDSENDVWSTLVKFVAVPSCIAV<br/> CLEWWWYEFMTVLAGYLPEPKVALAAAIVIQTTSLMYTIPTALSAVSTRVS<br/> NELGAGRPEKAKTAATVAVGA AVAVSVFGLVGTTVGREAWGKVFTADKVVL<br/> ELTAAVIPVIGACELANCPQTISCGILRGSARPGIGAKINFYAFYVVGAPVAVL<br/> AFVWGLGFMGLCYGLLGAQLACAISILTVVYNTDWNKESLKAHDLVGKNVIS<br/> PNVDQIIVKCEEGLH<br/> MSQSNRVRDEVTLPLLQKTSHLKNHSSVLSVFLNEAISICKISYPLVLTGLFLYVR<br/> SFVSLSFLGGLGDATLAGGSLAAAFANITGYSLSGLTMGVESICSQAFGARRYN </p>                                                                                                                                                                                                                                                                                                                                                                                                                                                                                                                                                                                                                                                                                          |
| AT5G4<br>9130 | <p> YVCASVKRGIILLVTSPLVTLWMNMEKILLILKQDKKLASEAHIFLLYSVPDLV<br/> AQSFLHPLRVYLRTQSKTLPLSICTVIASFLHLPITFFLVSYLGIGKIALSGVVS<br/> N FNLVAFFLYICFFEDKLSVNEDEKITEETCEDSVREWKKLLCLAIPSCISVCLEW<br/> WCYEIMILLCGFLDPKASVASMGIQITSLVYIFPHSLSLGVSTRVGNELGSNQ </p>                                                                                                                                                                                                                                                                                                                                                                                                                                                                                                                                                                                                                                                                                                                                                                                                                                                                                            |
| AT5G5<br>2050 | <p> AQSFLHPLRVYLRTQSKTLPLSICTVIASFLHLPITFFLVSYLGIGKIALSGVVS<br/> N FNLVAFFLYICFFEDKLSVNEDEKITEETCEDSVREWKKLLCLAIPSCISVCLEW<br/> WCYEIMILLCGFLDPKASVASMGIQITSLVYIFPHSLSLGVSTRVGNELGSNQ </p>                                                                                                                                                                                                                                                                                                                                                                                                                                                                                                                                                                                                                                                                                                                                                                                                                                                                                                                                                        |

|                                              |                                                                                                                                                                                                                                                                                                                                                                                                                                                                                                                                                                                                                                                                                                                                                                                                                                                                                                                                                                                                                                                                                                                                                                                                                                                                                                                                                                                                                                                                                                                                                                                                                                                                                                                                                                                                                                                                                                                                                                                                                                                                                                                                                                                                  |
|----------------------------------------------|--------------------------------------------------------------------------------------------------------------------------------------------------------------------------------------------------------------------------------------------------------------------------------------------------------------------------------------------------------------------------------------------------------------------------------------------------------------------------------------------------------------------------------------------------------------------------------------------------------------------------------------------------------------------------------------------------------------------------------------------------------------------------------------------------------------------------------------------------------------------------------------------------------------------------------------------------------------------------------------------------------------------------------------------------------------------------------------------------------------------------------------------------------------------------------------------------------------------------------------------------------------------------------------------------------------------------------------------------------------------------------------------------------------------------------------------------------------------------------------------------------------------------------------------------------------------------------------------------------------------------------------------------------------------------------------------------------------------------------------------------------------------------------------------------------------------------------------------------------------------------------------------------------------------------------------------------------------------------------------------------------------------------------------------------------------------------------------------------------------------------------------------------------------------------------------------------|
| AT5G5<br>2450                                | PKRARRAAIVGLGLSIALGFTAFAFTVSVRNTWAMFFTDDKEIMKLTAMALPIV<br>GLCELGNCPQTTGCGVLRGSARPKIGANINGVAFYAVGIPVGAVLAFWFGFGF<br>KGLWLGMMLAAQITCVIGMMAATCRTDWELEAERAKVLTTAVDCGSSDDDAK<br>EDMEAGMVDK<br>MRDDREREGEDLSWPLIGEKSSEVKEEVKKQLWLSGPLIAVSLLQFCLQVISVMF<br>VGHLGSLPLSAASIATSFASVTGFSFLMGTASALDTLCCQAYGAKKYGMLGIQ<br>MQRAMFVLTLASIPLSIIWANTEHLLVFFGQNKSIATLAGSYAKFMIPSIFAYGLL<br>QCFNRFLQAQNNVFPVVFCSGVTTSLHVLLCWVLVFKSGLGFQGAALANSISY<br>WLVNVLFCYVKFSPSCSLTWTGFSKEALRDILPFLRLAVPSALMVCLEMWSFE<br>LLVLLSGLLPNPVLETSLVLSICLNTSGTMWMIPFGLSGAASTRISNELGAGNPKV<br>AKLAVRVVICIAVAESIVIGSVLILIRNIWGLAYSELEVVSIVASMMPIALGNFL<br>DSLQCVLSGVARGCGWQKIGAIINLGSYYLVGVPSGLLLAFHFHVGGRLWL<br>IICALVVQVFGGLGLVTIFTNWDEEAKKATNRIESSSVKDFAVDDRSVVVF<br>MRGGDGEESERVALLKSPHTAEEDGEGLKDRILVETKKLWQIVGPAIFSRVT<br>TYSMLVITQAFAGHLGDLELAAISIVNNVTGFGNFGLLLGMASALETLCCQAFC<br>AKKYHMLGVYMQRSWIVLFCCVLLLPTYIFTTPVLKFLGQPDIAELSGVVAI<br>WVIPLHFAFTLSFPLQRFLQCQLKNRVTAYAAAVLVHILVCWLFVDGLKLG<br>VVGTVATISISWWVNVLLVYSTCGGCPLTWTGLSSEALTGLWEFLKLSASSGV<br>MLCLENWYYRILIIMTGNLQNAIAVDSLICMAINGWEMMIPLAFFAGTGVR<br>VANELGAGNGKGARFATIVSVTQSLIIGLFFWVLMILLHNQIAWIFSSSAVLDA<br>VNKLSLLLAFTVLLNSVQPVLSGVAVGSGWQSYVAYINLGCYYCIGVPLGLFMG<br>WGFKLGVMGIWGGMIFGGTAVQTMILSFITMRCDWEKEAQKASARINKWSNT<br>IK<br>MAQTYLLFLLPDLLINSFLHPIRVYLRAQNVTHPVTLASLAGTLLHVAFNLALV<br>ERGLGGVAAAAAASSFSILCLLVLYLWISGVHLATWTAPSRECLTCWEPLIRLA<br>APSCVSVCLEWWWYEIMILLCGLLVDPTASVAAMGILIQTTSLIYVFPSSLGLAV<br>STRVGNELGANRGRARRMSAVVAVFFAAVMGFSVVFATAMRRRWGRMFTG<br>DEGILRLTGAALPILGLCELGNCPQTVGCGVVRRGTARPNVAANVNLGAFYLVG<br>MPVAVGLAFWLEVGFCLWLGLLSAQVCCAGLMLYMIGTTDWEYQACRAQL<br>LTALDEGSDGHKQPLIATLDNNNYS*<br>MPSKEDSPLVEAKLPLLEAHPLTDEREQDQSFPRRFWLESKRLWHIVGPSIFSRIA<br>SYSMLVITQAFAGHLGDLELAAISIANNVVVGDFGLLLGMASALETLCCQAFC<br>AKKYHMLGVYMQRSWIVLFICCIFLLPLYLFAFPVLKLLGQPEELAEELSGAVSIW<br>MIPVHFAFAFQFPLQRFLQCQLKTAPIAWVSLVALVVHVFSWLVFVKLQFGV<br>VGAAATINFSWWVLTGLFGYVWVGCPHTWSGFSVEAFSGLWEFLKLSAAA<br>GVMLCLENWYYKILIVMTGNLENAEIAVDALSICMTINSLELMIPLAFFAATGV<br>RVANELGAGNGKGAKFATMVSVVTSVIIIGLFFWMLILHDKFGYIFSNSKAVL<br>DEVNNLSLLAFTILLNSVQPVLSGVAVGSGWQSYVAYINLGCYYIIGVPLGILM<br>GWVFNQGVMIWAGMIFGGTATQTLILSLITIRCDWDKEAERAKLHLTKWTD<br>PKQELN* |
|                                              |                                                                                                                                                                                                                                                                                                                                                                                                                                                                                                                                                                                                                                                                                                                                                                                                                                                                                                                                                                                                                                                                                                                                                                                                                                                                                                                                                                                                                                                                                                                                                                                                                                                                                                                                                                                                                                                                                                                                                                                                                                                                                                                                                                                                  |
|                                              |                                                                                                                                                                                                                                                                                                                                                                                                                                                                                                                                                                                                                                                                                                                                                                                                                                                                                                                                                                                                                                                                                                                                                                                                                                                                                                                                                                                                                                                                                                                                                                                                                                                                                                                                                                                                                                                                                                                                                                                                                                                                                                                                                                                                  |
|                                              |                                                                                                                                                                                                                                                                                                                                                                                                                                                                                                                                                                                                                                                                                                                                                                                                                                                                                                                                                                                                                                                                                                                                                                                                                                                                                                                                                                                                                                                                                                                                                                                                                                                                                                                                                                                                                                                                                                                                                                                                                                                                                                                                                                                                  |
| AT5G6<br>5380                                |                                                                                                                                                                                                                                                                                                                                                                                                                                                                                                                                                                                                                                                                                                                                                                                                                                                                                                                                                                                                                                                                                                                                                                                                                                                                                                                                                                                                                                                                                                                                                                                                                                                                                                                                                                                                                                                                                                                                                                                                                                                                                                                                                                                                  |
|                                              |                                                                                                                                                                                                                                                                                                                                                                                                                                                                                                                                                                                                                                                                                                                                                                                                                                                                                                                                                                                                                                                                                                                                                                                                                                                                                                                                                                                                                                                                                                                                                                                                                                                                                                                                                                                                                                                                                                                                                                                                                                                                                                                                                                                                  |
|                                              |                                                                                                                                                                                                                                                                                                                                                                                                                                                                                                                                                                                                                                                                                                                                                                                                                                                                                                                                                                                                                                                                                                                                                                                                                                                                                                                                                                                                                                                                                                                                                                                                                                                                                                                                                                                                                                                                                                                                                                                                                                                                                                                                                                                                  |
|                                              |                                                                                                                                                                                                                                                                                                                                                                                                                                                                                                                                                                                                                                                                                                                                                                                                                                                                                                                                                                                                                                                                                                                                                                                                                                                                                                                                                                                                                                                                                                                                                                                                                                                                                                                                                                                                                                                                                                                                                                                                                                                                                                                                                                                                  |
| Glyma.<br>01G007<br>100.1.<br>Wm82.<br>a2.v1 |                                                                                                                                                                                                                                                                                                                                                                                                                                                                                                                                                                                                                                                                                                                                                                                                                                                                                                                                                                                                                                                                                                                                                                                                                                                                                                                                                                                                                                                                                                                                                                                                                                                                                                                                                                                                                                                                                                                                                                                                                                                                                                                                                                                                  |
|                                              |                                                                                                                                                                                                                                                                                                                                                                                                                                                                                                                                                                                                                                                                                                                                                                                                                                                                                                                                                                                                                                                                                                                                                                                                                                                                                                                                                                                                                                                                                                                                                                                                                                                                                                                                                                                                                                                                                                                                                                                                                                                                                                                                                                                                  |
|                                              |                                                                                                                                                                                                                                                                                                                                                                                                                                                                                                                                                                                                                                                                                                                                                                                                                                                                                                                                                                                                                                                                                                                                                                                                                                                                                                                                                                                                                                                                                                                                                                                                                                                                                                                                                                                                                                                                                                                                                                                                                                                                                                                                                                                                  |
|                                              |                                                                                                                                                                                                                                                                                                                                                                                                                                                                                                                                                                                                                                                                                                                                                                                                                                                                                                                                                                                                                                                                                                                                                                                                                                                                                                                                                                                                                                                                                                                                                                                                                                                                                                                                                                                                                                                                                                                                                                                                                                                                                                                                                                                                  |
| Glyma.<br>01G025<br>200.1.<br>Wm82.<br>a2.v1 |                                                                                                                                                                                                                                                                                                                                                                                                                                                                                                                                                                                                                                                                                                                                                                                                                                                                                                                                                                                                                                                                                                                                                                                                                                                                                                                                                                                                                                                                                                                                                                                                                                                                                                                                                                                                                                                                                                                                                                                                                                                                                                                                                                                                  |
|                                              |                                                                                                                                                                                                                                                                                                                                                                                                                                                                                                                                                                                                                                                                                                                                                                                                                                                                                                                                                                                                                                                                                                                                                                                                                                                                                                                                                                                                                                                                                                                                                                                                                                                                                                                                                                                                                                                                                                                                                                                                                                                                                                                                                                                                  |
|                                              |                                                                                                                                                                                                                                                                                                                                                                                                                                                                                                                                                                                                                                                                                                                                                                                                                                                                                                                                                                                                                                                                                                                                                                                                                                                                                                                                                                                                                                                                                                                                                                                                                                                                                                                                                                                                                                                                                                                                                                                                                                                                                                                                                                                                  |
|                                              |                                                                                                                                                                                                                                                                                                                                                                                                                                                                                                                                                                                                                                                                                                                                                                                                                                                                                                                                                                                                                                                                                                                                                                                                                                                                                                                                                                                                                                                                                                                                                                                                                                                                                                                                                                                                                                                                                                                                                                                                                                                                                                                                                                                                  |
| Glyma.<br>01G026<br>200.1.<br>Wm82.          |                                                                                                                                                                                                                                                                                                                                                                                                                                                                                                                                                                                                                                                                                                                                                                                                                                                                                                                                                                                                                                                                                                                                                                                                                                                                                                                                                                                                                                                                                                                                                                                                                                                                                                                                                                                                                                                                                                                                                                                                                                                                                                                                                                                                  |
|                                              |                                                                                                                                                                                                                                                                                                                                                                                                                                                                                                                                                                                                                                                                                                                                                                                                                                                                                                                                                                                                                                                                                                                                                                                                                                                                                                                                                                                                                                                                                                                                                                                                                                                                                                                                                                                                                                                                                                                                                                                                                                                                                                                                                                                                  |
|                                              |                                                                                                                                                                                                                                                                                                                                                                                                                                                                                                                                                                                                                                                                                                                                                                                                                                                                                                                                                                                                                                                                                                                                                                                                                                                                                                                                                                                                                                                                                                                                                                                                                                                                                                                                                                                                                                                                                                                                                                                                                                                                                                                                                                                                  |
|                                              |                                                                                                                                                                                                                                                                                                                                                                                                                                                                                                                                                                                                                                                                                                                                                                                                                                                                                                                                                                                                                                                                                                                                                                                                                                                                                                                                                                                                                                                                                                                                                                                                                                                                                                                                                                                                                                                                                                                                                                                                                                                                                                                                                                                                  |



|       |                                                                                                                                                                                                                                                                                                                                                                                                                                                                                                                                                                                                                                                                                                                                                                                                                                                                                                                                                                                                                                                                                                                                                                                                                                                                                                                                                                                                                                                                                                                                                                                                                                                                                                                                                                                                                                                                                                                                                                                                                                                                                                                                                                                                                                                                                                                                                                                                                                                                                                                                                                                                                                                                                                                                                                                                                 |
|-------|-----------------------------------------------------------------------------------------------------------------------------------------------------------------------------------------------------------------------------------------------------------------------------------------------------------------------------------------------------------------------------------------------------------------------------------------------------------------------------------------------------------------------------------------------------------------------------------------------------------------------------------------------------------------------------------------------------------------------------------------------------------------------------------------------------------------------------------------------------------------------------------------------------------------------------------------------------------------------------------------------------------------------------------------------------------------------------------------------------------------------------------------------------------------------------------------------------------------------------------------------------------------------------------------------------------------------------------------------------------------------------------------------------------------------------------------------------------------------------------------------------------------------------------------------------------------------------------------------------------------------------------------------------------------------------------------------------------------------------------------------------------------------------------------------------------------------------------------------------------------------------------------------------------------------------------------------------------------------------------------------------------------------------------------------------------------------------------------------------------------------------------------------------------------------------------------------------------------------------------------------------------------------------------------------------------------------------------------------------------------------------------------------------------------------------------------------------------------------------------------------------------------------------------------------------------------------------------------------------------------------------------------------------------------------------------------------------------------------------------------------------------------------------------------------------------------|
| a2.v1 | <p>GMAMVLHPVLSWLLMVKLEWGLVGAADVVLNGSWWFVVVAQLVYVFGGWC<br/> WPAWNGFSWEAFRSLWGFFRLSLASAVMLCLETWYFMALILFAGYLKNAQVS<br/> VDAFSICMNILGWTIMVSFGMNAATSVRISNELGARHPRTALFSLVVAVITSVLI<br/> GVLLAIVLMISRNEYPSSLFSNDTEVQDLVKDLTPFLCFCIVINNVPVLSGVAIG<br/> AGWQALVAYVNIACYLFGIPVGLVLGYKLDWGVKGIWLGMMISGTILQTCVLL<br/> VLIYKTNWNEEASLAEDRIRTWGGHKKATVNDTENTQET*</p> <p>MCTGAESRGDINGDPVISKVGGDYEDRMRTIELEGGEETACNWGTFVRGLLQG<br/> IQHHLTALNLPSSLASELKEELQSLAKVACPIIMTSLMMYSRSASVSMFLGRQGK<br/> VELAGGSLALGFANITANSVLKGLTMGMDPICCQAYGAKRWSVLNQTFRLTL<br/> CLLLLVAIPISILWLNMEPIQLMLGQDPEVTKVAQVYMFVFSIPELLAQAHNLPLR<br/> SFLRTQGLTTPVTIAASCAALLHLPINYFLATYLNLGVKGIALATGLNSINMTLG<br/> 200.1. LLLYILFSKKPLKPWQGATLLSAFHGWKPLLSLALPSCISVCLEWWWYEIMFLC<br/> Wm82. GLLSNPQATVATMGILIQTGLFLYVFPFSLSIALTTRIGHSLGAGQASKAQSTAI<br/> a2.v1 GFLTAFTLGLTAFILLFLVRKSWGKLFNTNETQIVELVTILPILGLCEVSNWPQTV<br/> SCGILSGTARPYLGARINLCAFYLVLGPVSVFATFIYKYELVGLWSGMVAAQAS<br/> CLCMMVYTLIQTDWEQQCKRAVELAQKTTERENKNDDEESGLLGSDQ*</p> <p>MSATLTCKLGDNNLSLNDKNDQPPSPQPLQKCPANMVSMVSELRIQRGIAL<br/> PMVAMNLAWFAKTAITTAFLGRLGELSLAGGALGFTFANVTGFSVLNGLCGA<br/> MEPICGQAHGAKNFRLLHKTLLMAISLLLLVSLPITFLWLNVDKILILFGQQQDI<br/> Glyma. STVARTYVVSCLIPDLFVASLFCPLKAYLSCQSITLPTMFSSAVALAFHIPINIVLSRT<br/> 01G213 MGLRGVSMVWITDLIVVLLAIYVLILENKKESMWKEGGWWDQSIEDWIRLL<br/> 000.1. KLCGSCCLNTCLEWWCYEILVLLTGHLTNAKQAVGVLAIVLNFDYLLFSVMLS<br/> Wm82. LATCVSTRVSNELGANQAGLAYRSACVSLALGFISGCIGSLVMVAARGIWGPLF<br/> a2.v1 SHDMAIIKGVKKTMLLMALVEVFNFPLAVCGGIVRGRTARPWLGMYANLGGFY<br/> FLALPLGVVFAFKLCLGLVGLLIGLLTGIVTCLTLLLVFIARLNWVEEAAKAQT<br/> TGQEQVKELSKYDAEERIDAHEKDVV*</p> <p>MCQLSSPSTLCESNEGHPNMPPTKIHEEPPDMFVLLIPKPPTTTTTFEQGQNNQK<br/> PHKTHFSLALDEVKCIANIALPMVLTGLLLYSRSVISMLFLGRVGELALAGGSLA<br/> IGFANITGYSILSGLAMGMEPICGQAFGAKRFKLLGLAMQRTMVLLLLTCVFISF<br/> Glyma. LWFMKKILVLCCQQEDATEAQSFILFSIPDLVAQSLLHPLRIYLRQSITLPLTY<br/> 01G216 TASLILLHVPINYFLVSVLKLGIKIALGAVWTNFNLFVSLILYIWSGVYKKTW<br/> 600.1. PGVSLKGVFSGWKSLLNLAIPSCISVCLEWWWYEIMILLCGLLINPQATVASMG<br/> Wm82. VLIQTTALIYFPSSLSFAVSTRVGNELGAENPKKAKLAALVGLCFSYGLGFSALF<br/> a2.v1 FAVSVRHVWASMFTSDAEIHALTSMVLPPIGLCELGNCPQTTVCGVLRGTARPKL<br/> GANINLGC FYLVGMPVAVRLSFFAGFDKGLWLGLLAAQASCMFTMLIVLART<br/> NWEQVQRAKELTSSSDSSEEEEEQDQKCLFSSGATKECSHSDSLV*</p> <p>MPRSRRSNPRLAERVFIAGTPDIAPITSTGDFYREFMVESKKLGYLAGPAIFSFVS<br/> KYSLGAFQTQIFAGHVTIDLAADVSVENSLIAGFSYGIMLGMGSALETLCGQAVG<br/> Glyma. AGKLDMLGVYMQRSWVLLLSMAFVLWPMYIFAGQVLKFIGQDTQISEAAGTF<br/> 02G038 AIWMIPQLFAYALNFPVAKFLQAQVLSWLLMVKLELGLVGAAVLVYVFGGWC<br/> 600.1. WPAWNGFSGEAFRNLCGFFRLSLASAVMLCVNNEVFKIDNFSPLVTSLLLLDY<br/> Wm82. IVECTALDGFDAKKKQVQGILVGLIPLGNMYFMALILFAGYLKNAQVFVDAF<br/> a2.v1 SICMNILGWTIMVSFGMNAATRATLFSLVVAVITSVLIGILLAIVLMILRNEYP<br/> FSNDTEGQDLVKNLTPFLCFCIVINNVPVLSGVAIGAGWQALVAYVNIACY</p> |
|-------|-----------------------------------------------------------------------------------------------------------------------------------------------------------------------------------------------------------------------------------------------------------------------------------------------------------------------------------------------------------------------------------------------------------------------------------------------------------------------------------------------------------------------------------------------------------------------------------------------------------------------------------------------------------------------------------------------------------------------------------------------------------------------------------------------------------------------------------------------------------------------------------------------------------------------------------------------------------------------------------------------------------------------------------------------------------------------------------------------------------------------------------------------------------------------------------------------------------------------------------------------------------------------------------------------------------------------------------------------------------------------------------------------------------------------------------------------------------------------------------------------------------------------------------------------------------------------------------------------------------------------------------------------------------------------------------------------------------------------------------------------------------------------------------------------------------------------------------------------------------------------------------------------------------------------------------------------------------------------------------------------------------------------------------------------------------------------------------------------------------------------------------------------------------------------------------------------------------------------------------------------------------------------------------------------------------------------------------------------------------------------------------------------------------------------------------------------------------------------------------------------------------------------------------------------------------------------------------------------------------------------------------------------------------------------------------------------------------------------------------------------------------------------------------------------------------------|

|                                              |                                                                                                                                                                                                                                                                                                                                                                                                                                                                                                                                                            |
|----------------------------------------------|------------------------------------------------------------------------------------------------------------------------------------------------------------------------------------------------------------------------------------------------------------------------------------------------------------------------------------------------------------------------------------------------------------------------------------------------------------------------------------------------------------------------------------------------------------|
|                                              | LFGIPVGLVLGYKLDWGVKGIWLGMIAGTILQTCVLLVLIYKTNWNEEASLAED<br>RIRTWGGHEKATVKDTKNTKEET*                                                                                                                                                                                                                                                                                                                                                                                                                                                                         |
| Glyma.<br>02G039<br>500.1.<br>Wm82.<br>a2.v1 | MSKMSSDEALALEEVHHPLEDDYCADGEEKEYFVRRVWNESKKLWNISGPAIF<br>NRVATFSMFVITQAFAGHLGDLELAATSIAINVILGLDFGILLGMSSALDTLCGQ<br>AFGAKKYYMLGIYMQRSWVVLSTGVMFLALFLFVTPILKFFGQTSEIAELAGVI<br>SLWLIPTHLAYIFYLPMHFLLQSQLKNNVTTWVSLLGLLVHAYLCWLVVNKFH<br>LGVIALVAFGNIAWLLVLGYFGYVICGGCTLTWTGFSIEAFSGVWEFSKLSTAS<br>GIMICLEVWYDKALMLMTGNLQSAKTITIEALTICLTINIWELMFPLSFYAATAV<br>RVANELGAGNGKGAKFASMVSVVTSHHSIFFWLLIMVFRRLAYLFSSESVIKE<br>VDKLSFPLGVITLLNSVQPVLSGVAVGSGWQKYVAFINLGSYYLIGLPLGYLLGF<br>VFRLGVQGVWAGLIFGGPAIQTLLILAWVTSRCNWDKQAERARLHLTKWDPNQ<br>ELIR*             |
| Glyma.<br>02G075<br>300.1.<br>Wm82.<br>a2.v1 | MGDNKDRDFFSHKFPTTSQVMEEMKELWGMALPITAMNMLVFVRVSVLFL<br>GRLGSLELAGGALSIGFTNITGYSVLVGLAAGLEPVCSQAYGSKNWDLLSLSLQ<br>RMVLILLMAIVPISLLWLNLERIMLFMCQDSAITGMASLYCFYSLPDLTNTLLQ<br>PLRVFLRSQKVTKPMMYCSLVAVLFHVPLNYLLVVVMGLGVPGVAMASVMT<br>NLNMVVLMAGYVCVCRKREVVVKWGCWGVGGGVVCSGLGQLMGFAVPSC<br>MICLEWWWYEIVTVLAGYLPRLTAVAATGILIQTTSMMYTVPMALAGCVSAR<br>VGNELGAGKPYKAKLAADVVALGCAVIGFINVTWTVILGQRWAGLFTNDEPV<br>KALVASVMPIMGLCELGNCPQTTGCGILRGMARPGIGAHINLGSFYFVGTPVA<br>VGLAFWFKVGFSGLWFGLLSAQVACAVSILYVVLVRTDWEAEALKAELTRIE<br>MGSCNGLRNKENERDEERKGLLVNGNGNKKDDIC* |
| Glyma.<br>02G089<br>900.1.<br>Wm82.<br>a2.v1 | MEETLLPKENKRVTLTNSKSSSGFVQELKNVSLMAAPMVVVSVSQFLLQVVSL<br>MMAGHLGELSLAGVALATSFADVTGFSILMGMAGALETQCGQSFGAEQFHLK<br>GNYVFCAILSLILSSVPISIIWIFMDKLLILLGQDHAISLIAGNYCIWLIPALFGYAV<br>LQALVRYFQTQSLIFPMLVTSVVVLVLHIPICWVLVFGGLGLGQNGAAISIGISYW<br>LSVMLLLIYTKYYPSCQKTKIALGSNALRSIKEFFFLAIPSALMICFEWWSFELVVI<br>LAGLLPNPKLETSVLSICLNICTLHYFIPYGTGAADVSTRVSNELGARRPQAAREA<br>VFAVIVLAFTDAVVFSSVLCFRHVLGFASFNEMEVVHYVAKIVPVLCLSFMD<br>GFLGVLCGIVRGSGWQKIGAITNLVAYYAVGIPVSLLFGFGLNFNGKGLWIGILT<br>GSTLQTIILALLTAFTNWEKQASLAIERLSEPDVTF*                               |
| Glyma.<br>02G090<br>000.1.<br>Wm82.<br>a2.v1 | MMGKEEATPLLRKSEVAPLEDDDAFCVELKRVGSMAAPMVAANMCQYLLQV<br>VSLMMVGHLGVLVSFSGVAIATSFAEVTGFCVLMGMAGALETLCGQTYGAEFF<br>SEIGNYTFCAIVTLLLVLCPISMLWIFVDKILLFGQDPEISHVAHEYCIYSIPALY<br>GFAVLQCQIRYFQTQSMIFPMVFSSIAVLCLHVPICWALVFKLALGHVGAAYAI<br>GISYWLNVIGLGIYMNFSPECKTKIVFSFNALLSIPEFCQFAIPSGLMFCFEMWS<br>FELLTLFAGLLPNPQLQTSVLSVCLNTTTLHYIIPYAVGASASTRISNELGAGNPK<br>AAQGIVRVIVIIIGIVDGVIVSIFVCCRHILGYAYSNDKEVVVDYVSDIVPILCSFT<br>ADSLIGALSIGARGGGFQQIGAYVNLGAYYLVGVPLAFLGLFVLHFNAGLWLM<br>GSLTGSVLQVILTVVTVLTDWQKEATKARVRIVEKSIKAHNGSV*                           |
| Glyma.<br>02G090<br>100.1.<br>Wm82.          | MEESSGKKGWGMKREELKKVGTIAAPMAVSSVLQYLLPVVSLVMVGHLNQ<br>LSLSSVAIATSLTNVSGFSVLSGMAGGLETLCGQAFGAGQYEFGLYTYTAHLS<br>LVCFPITILWIFNDKILTLLGQDPTISLEVRKYAIWLIPALFGSAILKPLTRFFQTQS<br>LISPMILTSIALCFHVVTCTWTLVFKLGLGHVGAASFSLCVWFNVIMLLSFVRY                                                                                                                                                                                                                                                                                                                        |

|                                              |                                                                                                                                                                                                                                                                                                                                                                                                                                                                                                                                                                                                                                                                                                                                                                                                                                                                                                                                                                                                                                                                                                                                                                                                                                                                                                                                                                                                                                                                                                                                                                                                                                                                                                                                                                                                                                                                                                                                                                                                                                                                                                                                                                                                                                                                                                                                                                                                                                                                                                                                                                                                                                                                 |
|----------------------------------------------|-----------------------------------------------------------------------------------------------------------------------------------------------------------------------------------------------------------------------------------------------------------------------------------------------------------------------------------------------------------------------------------------------------------------------------------------------------------------------------------------------------------------------------------------------------------------------------------------------------------------------------------------------------------------------------------------------------------------------------------------------------------------------------------------------------------------------------------------------------------------------------------------------------------------------------------------------------------------------------------------------------------------------------------------------------------------------------------------------------------------------------------------------------------------------------------------------------------------------------------------------------------------------------------------------------------------------------------------------------------------------------------------------------------------------------------------------------------------------------------------------------------------------------------------------------------------------------------------------------------------------------------------------------------------------------------------------------------------------------------------------------------------------------------------------------------------------------------------------------------------------------------------------------------------------------------------------------------------------------------------------------------------------------------------------------------------------------------------------------------------------------------------------------------------------------------------------------------------------------------------------------------------------------------------------------------------------------------------------------------------------------------------------------------------------------------------------------------------------------------------------------------------------------------------------------------------------------------------------------------------------------------------------------------------|
| a2.v1                                        | <p>SACEKTRISFSKNALVGVGEFFRFAVPAAVMVCLKWWACEILVLLAGLFPNPKL<br/> ETSVLISICTISTLHFTIPYGFGAASTRVSNELGAGNPQAVHVAVSATMFLAVT<br/> EGFIVSATLFGCRHILGYAYSDDRMVVHYVAVMIPLLCLSIFTDSLQGVLSGVAR<br/> GSGWQHLGAYVNLGAFYLVGIPVGILLGFVAHFRAKGLWIGIVTGSIVQSILLSL<br/> ITALTNWKKQAIMARERVFDKPPDVNGSYHMTSA*</p> <p>MMPLLMFLSGIRNAFSSDELGLEILNIALPTTLALAADPIASLIDTAFIGHIGPVEL<br/> AAVGVSIAIFNQISKITIIPVSVTTSLVAEEDAADQNQQSEKEMLMKVSNEVDV<br/> KLDVHDHIEKAGNPSSANVGRVAKLKHDKSYIPSASSGVVIGGVLGVLQALFLI<br/> FTAKPMLSYMGVDSNSPMFKPAQQYLTLRSFGAPAVIISMAIQGVFRGIKDTKT<br/> PLYATVMGDVTNIILDPLLMFVLRGNGAAISHIISQYLISIMLLWSLMQQQVVL<br/> IPPSIQDFQFGKILKNGFLLLIKVASVTFCVTLSASLAARKGSTTMAAFQICLQIW<br/> MATSLADGLAVAGQAIISAFARNDYKRVIASASRVLQLGLILGLVLSVLLLSL<br/> LPFASRLFTNDNNVLQLISIGIPYVAATQPINALAFVFDGVNYGASDFTYSAYSM<br/> IMVALVSILSLYTLSSSLGFTGIWIALSIYMTLRIFAGFWRIGTGSGPWSFLKVNNV<br/> GL*</p> <p>MEEIKAIGRISCPTAITGLILYSRAMISMIFLGYLGEMELAGGSLSIGFANITGYSVI<br/> SGLAMGMEPICGQAYGAKQWKILGLTLQRTVLLLLSTSIPIFMWLNMKRILLW<br/> SGQDQEIASVAQTFITFSIPDLFLLSLLHPLRIYLRTQSITLPTYCSAISVLLHVPLN<br/> FLLVVLHKMGIAGVATAMVLTNLNLILFISSFVYFSGAYKASWVSPSVDCIKGW<br/> SSLLSLAIPTCVSVCLEWWWYEFMIMLCGLLVNPKATIASMGILIQTTSLVYVFP<br/> SLSLGVSTRVGNELGAKNPRKARVSMIVSLFCALALGLAAMLFTTLMRHQWGR<br/> FFTNDHEILELTSLVLPIAGLCELGNCPQTTGCGVLRGSARPTIGANINLGSFYLV<br/> GMPVAILLSFVAKMGFPGLWLGLLAAQASCAGLMFYVLCTTDWNVQVERAK<br/> ELTKSSTTTTTAMTATIATTSCSTSPNCNYKLLPTLTKKEANMNKNAHVCLEEIV<br/> ITSGGGGDELTKISSVETDPLIIPTTKHTQV*</p> <p>MVMEATHFTTSQYQYHIDGGFTRRPFMRMRKRSHISYGYGPHFLRRSLYVPFIA<br/> LGPKAKAKAEAEAEAEASSFSSVDVRRELISLTLPALASQAIDPLAQLMETAYIG<br/> RLGTVELASAGVSISIFNIISKLFNIPLLSVATSFVAEDIAKASSTADAKTKQQLSSV<br/> STALLALVLGFFEALALYLGSGAFLHLIGVSTQNPTYVPAHFSLSLRAVGAPA<br/> VVLSSLQGIFRGFKDTKTVPICLGIGNFSVFLFPLLMYYFRLGVTGAAISTVISQ<br/> YIGTMLMIWCLNKRAELLPPKMGDQLQFGSYIKSGGFLGRTL SVLSTMTLGTSM<br/> AARHGPVAMAAHQICMQVWLAVSLTDLAASGQALIASSVSRHEYKVAKE<br/> VTSVLRLIGLVMGICLTAILGASFGSLATIFTQDTEVLQVIRTLALFVSASQPFNAL<br/> AYIFDGLHYGVSDFRYAAFSMMFVGAVSSAFLVFAPPLFGLQGVLGLGLFMA<br/> LRAAAGAVRLLSKNGPWWFLHRFTNCRGGLISL*</p> <p>MEGNLKQKLLSREKISEEEENLSLVKRVWEESKVMWIVAAPAIFTRFTTFGLSVIS<br/> QAFIGHIGSKELAAAYALVFTVIIRFANGILLGMSSALSTLCGQAYGAKEYDMMG<br/> VYLQRSSIVLFLTALCLLPFIFTSPILTLLGQDESIARVARNVSLWSIPILFAYIVSF<br/> NCQTFLQSQSKNVIIAFLATLSIIHVLSLSWLFTIQFKYGIPGAMISTILAYWIPNVG<br/> QLIFITCGWCPETWKGFSSLAFKDLWPVVKLSLSAGAMLCLELWYNTILILLTG<br/> NMKNAEVQIDALSICININGWEMMIAFGFMAAASVRVANELGRGSSKDAKFSI<br/> VVTVLTSFSIGFILFVLFLFLREKVAYLFTSNEDVATAVGDLSPLLAVSLLLSIQP<br/> VLSGVAVGAGWQSIVAYVNIGCYYLIGIPVGIVLGNIIHLQVKGIWIGMLFGTLI<br/> QTIVLTIITYKTNWDEQVIIARNRISKWSKVDLDRET VTSDN*</p> |
| Glyma.<br>02G181<br>800.1.<br>Wm82.<br>a2.v1 | <p>FTAKPMLSYMGVDSNSPMFKPAQQYLTLRSFGAPAVIISMAIQGVFRGIKDTKT<br/> PLYATVMGDVTNIILDPLLMFVLRGNGAAISHIISQYLISIMLLWSLMQQQVVL<br/> IPPSIQDFQFGKILKNGFLLLIKVASVTFCVTLSASLAARKGSTTMAAFQICLQIW<br/> MATSLADGLAVAGQAIISAFARNDYKRVIASASRVLQLGLILGLVLSVLLLSL<br/> LPFASRLFTNDNNVLQLISIGIPYVAATQPINALAFVFDGVNYGASDFTYSAYSM<br/> IMVALVSILSLYTLSSSLGFTGIWIALSIYMTLRIFAGFWRIGTGSGPWSFLKVNNV<br/> GL*</p> <p>MEEIKAIGRISCPTAITGLILYSRAMISMIFLGYLGEMELAGGSLSIGFANITGYSVI<br/> SGLAMGMEPICGQAYGAKQWKILGLTLQRTVLLLLSTSIPIFMWLNMKRILLW<br/> SGQDQEIASVAQTFITFSIPDLFLLSLLHPLRIYLRTQSITLPTYCSAISVLLHVPLN<br/> FLLVVLHKMGIAGVATAMVLTNLNLILFISSFVYFSGAYKASWVSPSVDCIKGW<br/> SSLLSLAIPTCVSVCLEWWWYEFMIMLCGLLVNPKATIASMGILIQTTSLVYVFP<br/> SLSLGVSTRVGNELGAKNPRKARVSMIVSLFCALALGLAAMLFTTLMRHQWGR<br/> FFTNDHEILELTSLVLPIAGLCELGNCPQTTGCGVLRGSARPTIGANINLGSFYLV<br/> GMPVAILLSFVAKMGFPGLWLGLLAAQASCAGLMFYVLCTTDWNVQVERAK<br/> ELTKSSTTTTTAMTATIATTSCSTSPNCNYKLLPTLTKKEANMNKNAHVCLEEIV<br/> ITSGGGGDELTKISSVETDPLIIPTTKHTQV*</p> <p>MVMEATHFTTSQYQYHIDGGFTRRPFMRMRKRSHISYGYGPHFLRRSLYVPFIA<br/> LGPKAKAKAEAEAEAEASSFSSVDVRRELISLTLPALASQAIDPLAQLMETAYIG<br/> RLGTVELASAGVSISIFNIISKLFNIPLLSVATSFVAEDIAKASSTADAKTKQQLSSV<br/> STALLALVLGFFEALALYLGSGAFLHLIGVSTQNPTYVPAHFSLSLRAVGAPA<br/> VVLSSLQGIFRGFKDTKTVPICLGIGNFSVFLFPLLMYYFRLGVTGAAISTVISQ<br/> YIGTMLMIWCLNKRAELLPPKMGDQLQFGSYIKSGGFLGRTL SVLSTMTLGTSM<br/> AARHGPVAMAAHQICMQVWLAVSLTDLAASGQALIASSVSRHEYKVAKE<br/> VTSVLRLIGLVMGICLTAILGASFGSLATIFTQDTEVLQVIRTLALFVSASQPFNAL<br/> AYIFDGLHYGVSDFRYAAFSMMFVGAVSSAFLVFAPPLFGLQGVLGLGLFMA<br/> LRAAAGAVRLLSKNGPWWFLHRFTNCRGGLISL*</p> <p>MEGNLKQKLLSREKISEEEENLSLVKRVWEESKVMWIVAAPAIFTRFTTFGLSVIS<br/> QAFIGHIGSKELAAAYALVFTVIIRFANGILLGMSSALSTLCGQAYGAKEYDMMG<br/> VYLQRSSIVLFLTALCLLPFIFTSPILTLLGQDESIARVARNVSLWSIPILFAYIVSF<br/> NCQTFLQSQSKNVIIAFLATLSIIHVLSLSWLFTIQFKYGIPGAMISTILAYWIPNVG<br/> QLIFITCGWCPETWKGFSSLAFKDLWPVVKLSLSAGAMLCLELWYNTILILLTG<br/> NMKNAEVQIDALSICININGWEMMIAFGFMAAASVRVANELGRGSSKDAKFSI<br/> VVTVLTSFSIGFILFVLFLFLREKVAYLFTSNEDVATAVGDLSPLLAVSLLLSIQP<br/> VLSGVAVGAGWQSIVAYVNIGCYYLIGIPVGIVLGNIIHLQVKGIWIGMLFGTLI<br/> QTIVLTIITYKTNWDEQVIIARNRISKWSKVDLDRET VTSDN*</p>                                                                                                                                                                                                                                                                                                                                                                                                                                                                                     |
| Glyma.<br>02G218<br>400.1.<br>Wm82.<br>a2.v1 | <p>FTAKPMLSYMGVDSNSPMFKPAQQYLTLRSFGAPAVIISMAIQGVFRGIKDTKT<br/> PLYATVMGDVTNIILDPLLMFVLRGNGAAISHIISQYLISIMLLWSLMQQQVVL<br/> IPPSIQDFQFGKILKNGFLLLIKVASVTFCVTLSASLAARKGSTTMAAFQICLQIW<br/> MATSLADGLAVAGQAIISAFARNDYKRVIASASRVLQLGLILGLVLSVLLLSL<br/> LPFASRLFTNDNNVLQLISIGIPYVAATQPINALAFVFDGVNYGASDFTYSAYSM<br/> IMVALVSILSLYTLSSSLGFTGIWIALSIYMTLRIFAGFWRIGTGSGPWSFLKVNNV<br/> GL*</p> <p>MEEIKAIGRISCPTAITGLILYSRAMISMIFLGYLGEMELAGGSLSIGFANITGYSVI<br/> SGLAMGMEPICGQAYGAKQWKILGLTLQRTVLLLLSTSIPIFMWLNMKRILLW<br/> SGQDQEIASVAQTFITFSIPDLFLLSLLHPLRIYLRTQSITLPTYCSAISVLLHVPLN<br/> FLLVVLHKMGIAGVATAMVLTNLNLILFISSFVYFSGAYKASWVSPSVDCIKGW<br/> SSLLSLAIPTCVSVCLEWWWYEFMIMLCGLLVNPKATIASMGILIQTTSLVYVFP<br/> SLSLGVSTRVGNELGAKNPRKARVSMIVSLFCALALGLAAMLFTTLMRHQWGR<br/> FFTNDHEILELTSLVLPIAGLCELGNCPQTTGCGVLRGSARPTIGANINLGSFYLV<br/> GMPVAILLSFVAKMGFPGLWLGLLAAQASCAGLMFYVLCTTDWNVQVERAK<br/> ELTKSSTTTTTAMTATIATTSCSTSPNCNYKLLPTLTKKEANMNKNAHVCLEEIV<br/> ITSGGGGDELTKISSVETDPLIIPTTKHTQV*</p> <p>MVMEATHFTTSQYQYHIDGGFTRRPFMRMRKRSHISYGYGPHFLRRSLYVPFIA<br/> LGPKAKAKAEAEAEAEASSFSSVDVRRELISLTLPALASQAIDPLAQLMETAYIG<br/> RLGTVELASAGVSISIFNIISKLFNIPLLSVATSFVAEDIAKASSTADAKTKQQLSSV<br/> STALLALVLGFFEALALYLGSGAFLHLIGVSTQNPTYVPAHFSLSLRAVGAPA<br/> VVLSSLQGIFRGFKDTKTVPICLGIGNFSVFLFPLLMYYFRLGVTGAAISTVISQ<br/> YIGTMLMIWCLNKRAELLPPKMGDQLQFGSYIKSGGFLGRTL SVLSTMTLGTSM<br/> AARHGPVAMAAHQICMQVWLAVSLTDLAASGQALIASSVSRHEYKVAKE<br/> VTSVLRLIGLVMGICLTAILGASFGSLATIFTQDTEVLQVIRTLALFVSASQPFNAL<br/> AYIFDGLHYGVSDFRYAAFSMMFVGAVSSAFLVFAPPLFGLQGVLGLGLFMA<br/> LRAAAGAVRLLSKNGPWWFLHRFTNCRGGLISL*</p> <p>MEGNLKQKLLSREKISEEEENLSLVKRVWEESKVMWIVAAPAIFTRFTTFGLSVIS<br/> QAFIGHIGSKELAAAYALVFTVIIRFANGILLGMSSALSTLCGQAYGAKEYDMMG<br/> VYLQRSSIVLFLTALCLLPFIFTSPILTLLGQDESIARVARNVSLWSIPILFAYIVSF<br/> NCQTFLQSQSKNVIIAFLATLSIIHVLSLSWLFTIQFKYGIPGAMISTILAYWIPNVG<br/> QLIFITCGWCPETWKGFSSLAFKDLWPVVKLSLSAGAMLCLELWYNTILILLTG<br/> NMKNAEVQIDALSICININGWEMMIAFGFMAAASVRVANELGRGSSKDAKFSI<br/> VVTVLTSFSIGFILFVLFLFLREKVAYLFTSNEDVATAVGDLSPLLAVSLLLSIQP<br/> VLSGVAVGAGWQSIVAYVNIGCYYLIGIPVGIVLGNIIHLQVKGIWIGMLFGTLI<br/> QTIVLTIITYKTNWDEQVIIARNRISKWSKVDLDRET VTSDN*</p>                                                                                                                                                                                                                                                                                                                                                                                                                                                                                     |
| Glyma.<br>02G310<br>800.1.<br>Wm82.<br>a2.v1 | <p>FTAKPMLSYMGVDSNSPMFKPAQQYLTLRSFGAPAVIISMAIQGVFRGIKDTKT<br/> PLYATVMGDVTNIILDPLLMFVLRGNGAAISHIISQYLISIMLLWSLMQQQVVL<br/> IPPSIQDFQFGKILKNGFLLLIKVASVTFCVTLSASLAARKGSTTMAAFQICLQIW<br/> MATSLADGLAVAGQAIISAFARNDYKRVIASASRVLQLGLILGLVLSVLLLSL<br/> LPFASRLFTNDNNVLQLISIGIPYVAATQPINALAFVFDGVNYGASDFTYSAYSM<br/> IMVALVSILSLYTLSSSLGFTGIWIALSIYMTLRIFAGFWRIGTGSGPWSFLKVNNV<br/> GL*</p> <p>MEEIKAIGRISCPTAITGLILYSRAMISMIFLGYLGEMELAGGSLSIGFANITGYSVI<br/> SGLAMGMEPICGQAYGAKQWKILGLTLQRTVLLLLSTSIPIFMWLNMKRILLW<br/> SGQDQEIASVAQTFITFSIPDLFLLSLLHPLRIYLRTQSITLPTYCSAISVLLHVPLN<br/> FLLVVLHKMGIAGVATAMVLTNLNLILFISSFVYFSGAYKASWVSPSVDCIKGW<br/> SSLLSLAIPTCVSVCLEWWWYEFMIMLCGLLVNPKATIASMGILIQTTSLVYVFP<br/> SLSLGVSTRVGNELGAKNPRKARVSMIVSLFCALALGLAAMLFTTLMRHQWGR<br/> FFTNDHEILELTSLVLPIAGLCELGNCPQTTGCGVLRGSARPTIGANINLGSFYLV<br/> GMPVAILLSFVAKMGFPGLWLGLLAAQASCAGLMFYVLCTTDWNVQVERAK<br/> ELTKSSTTTTTAMTATIATTSCSTSPNCNYKLLPTLTKKEANMNKNAHVCLEEIV<br/> ITSGGGGDELTKISSVETDPLIIPTTKHTQV*</p> <p>MVMEATHFTTSQYQYHIDGGFTRRPFMRMRKRSHISYGYGPHFLRRSLYVPFIA<br/> LGPKAKAKAEAEAEAEASSFSSVDVRRELISLTLPALASQAIDPLAQLMETAYIG<br/> RLGTVELASAGVSISIFNIISKLFNIPLLSVATSFVAEDIAKASSTADAKTKQQLSSV<br/> STALLALVLGFFEALALYLGSGAFLHLIGVSTQNPTYVPAHFSLSLRAVGAPA<br/> VVLSSLQGIFRGFKDTKTVPICLGIGNFSVFLFPLLMYYFRLGVTGAAISTVISQ<br/> YIGTMLMIWCLNKRAELLPPKMGDQLQFGSYIKSGGFLGRTL SVLSTMTLGTSM<br/> AARHGPVAMAAHQICMQVWLAVSLTDLAASGQALIASSVSRHEYKVAKE<br/> VTSVLRLIGLVMGICLTAILGASFGSLATIFTQDTEVLQVIRTLALFVSASQPFNAL<br/> AYIFDGLHYGVSDFRYAAFSMMFVGAVSSAFLVFAPPLFGLQGVLGLGLFMA<br/> LRAAAGAVRLLSKNGPWWFLHRFTNCRGGLISL*</p> <p>MEGNLKQKLLSREKISEEEENLSLVKRVWEESKVMWIVAAPAIFTRFTTFGLSVIS<br/> QAFIGHIGSKELAAAYALVFTVIIRFANGILLGMSSALSTLCGQAYGAKEYDMMG<br/> VYLQRSSIVLFLTALCLLPFIFTSPILTLLGQDESIARVARNVSLWSIPILFAYIVSF<br/> NCQTFLQSQSKNVIIAFLATLSIIHVLSLSWLFTIQFKYGIPGAMISTILAYWIPNVG<br/> QLIFITCGWCPETWKGFSSLAFKDLWPVVKLSLSAGAMLCLELWYNTILILLTG<br/> NMKNAEVQIDALSICININGWEMMIAFGFMAAASVRVANELGRGSSKDAKFSI<br/> VVTVLTSFSIGFILFVLFLFLREKVAYLFTSNEDVATAVGDLSPLLAVSLLLSIQP<br/> VLSGVAVGAGWQSIVAYVNIGCYYLIGIPVGIVLGNIIHLQVKGIWIGMLFGTLI<br/> QTIVLTIITYKTNWDEQVIIARNRISKWSKVDLDRET VTSDN*</p>                                                                                                                                                                                                                                                                                                                                                                                                                                                                                     |
| Glyma.<br>03G005<br>200.1.<br>Wm82.<br>a2.v1 | <p>FTAKPMLSYMGVDSNSPMFKPAQQYLTLRSFGAPAVIISMAIQGVFRGIKDTKT<br/> PLYATVMGDVTNIILDPLLMFVLRGNGAAISHIISQYLISIMLLWSLMQQQVVL<br/> IPPSIQDFQFGKILKNGFLLLIKVASVTFCVTLSASLAARKGSTTMAAFQICLQIW<br/> MATSLADGLAVAGQAIISAFARNDYKRVIASASRVLQLGLILGLVLSVLLLSL<br/> LPFASRLFTNDNNVLQLISIGIPYVAATQPINALAFVFDGVNYGASDFTYSAYSM<br/> IMVALVSILSLYTLSSSLGFTGIWIALSIYMTLRIFAGFWRIGTGSGPWSFLKVNNV<br/> GL*</p> <p>MEEIKAIGRISCPTAITGLILYSRAMISMIFLGYLGEMELAGGSLSIGFANITGYSVI<br/> SGLAMGMEPICGQAYGAKQWKILGLTLQRTVLLLLSTSIPIFMWLNMKRILLW<br/> SGQDQEIASVAQTFITFSIPDLFLLSLLHPLRIYLRTQSITLPTYCSAISVLLHVPLN<br/> FLLVVLHKMGIAGVATAMVLTNLNLILFISSFVYFSGAYKASWVSPSVDCIKGW<br/> SSLLSLAIPTCVSVCLEWWWYEFMIMLCGLLVNPKATIASMGILIQTTSLVYVFP<br/> SLSLGVSTRVGNELGAKNPRKARVSMIVSLFCALALGLAAMLFTTLMRHQWGR<br/> FFTNDHEILELTSLVLPIAGLCELGNCPQTTGCGVLRGSARPTIGANINLGSFYLV<br/> GMPVAILLSFVAKMGFPGLWLGLLAAQASCAGLMFYVLCTTDWNVQVERAK<br/> ELTKSSTTTTTAMTATIATTSCSTSPNCNYKLLPTLTKKEANMNKNAHVCLEEIV<br/> ITSGGGGDELTKISSVETDPLIIPTTKHTQV*</p> <p>MVMEATHFTTSQYQYHIDGGFTRRPFMRMRKRSHISYGYGPHFLRRSLYVPFIA<br/> LGPKAKAKAEAEAEAEASSFSSVDVRRELISLTLPALASQAIDPLAQLMETAYIG<br/> RLGTVELASAGVSISIFNIISKLFNIPLLSVATSFVAEDIAKASSTADAKTKQQLSSV<br/> STALLALVLGFFEALALYLGSGAFLHLIGVSTQNPTYVPAHFSLSLRAVGAPA<br/> VVLSSLQGIFRGFKDTKTVPICLGIGNFSVFLFPLLMYYFRLGVTGAAISTVISQ<br/> YIGTMLMIWCLNKRAELLPPKMGDQLQFGSYIKSGGFLGRTL SVLSTMTLGTSM<br/> AARHGPVAMAAHQICMQVWLAVSLTDLAASGQALIASSVSRHEYKVAKE<br/> VTSVLRLIGLVMGICLTAILGASFGSLATIFTQDTEVLQVIRTLALFVSASQPFNAL<br/> AYIFDGLHYGVSDFRYAAFSMMFVGAVSSAFLVFAPPLFGLQGVLGLGLFMA<br/> LRAAAGAVRLLSKNGPWWFLHRFTNCRGGLISL*</p> <p>MEGNLKQKLLSREKISEEEENLSLVKRVWEESKVMWIVAAPAIFTRFTTFGLSVIS<br/> QAFIGHIGSKELAAAYALVFTVIIRFANGILLGMSSALSTLCGQAYGAKEYDMMG<br/> VYLQRSSIVLFLTALCLLPFIFTSPILTLLGQDESIARVARNVSLWSIPILFAYIVSF<br/> NCQTFLQSQSKNVIIAFLATLSIIHVLSLSWLFTIQFKYGIPGAMISTILAYWIPNVG<br/> QLIFITCGWCPETWKGFSSLAFKDLWPVVKLSLSAGAMLCLELWYNTILILLTG<br/> NMKNAEVQIDALSICININGWEMMIAFGFMAAASVRVANELGRGSSKDAKFSI<br/> VVTVLTSFSIGFILFVLFLFLREKVAYLFTSNEDVATAVGDLSPLLAVSLLLSIQP<br/> VLSGVAVGAGWQSIVAYVNIGCYYLIGIPVGIVLGNIIHLQVKGIWIGMLFGTLI<br/> QTIVLTIITYKTNWDEQVIIARNRISKWSKVDLDRET VTSDN*</p>                                                                                                                                                                                                                                                                                                                                                                                                                                                                                     |

|        |  |                                                                                                                                                                                   |
|--------|--|-----------------------------------------------------------------------------------------------------------------------------------------------------------------------------------|
|        |  | MEGNLEKKLLSREQKSEENLSLVKRVWEESKVMWIVAAPAIFTRFTTFGISVIS<br>QAFIGHIGSRELAAYALVFTVIIRFANGILLGMASALSTLCGQAYGAKEYDMMG                                                                  |
| Glyma. |  | VYLQRSWIVLFLSAICLLPLFIFTSPILTLLGQDESIAQVARTISIWSIPVLFAIVSN                                                                                                                        |
| 03G005 |  | SCQTFLQSQSKNVIISYLAALSIIHVLSLWLFMTMQFKYGIPGAMISTILAYWIPNIG                                                                                                                        |
| 300.1. |  | QLIFITCGWCPETWKGFSFLAFKDLWPVAKLSISSGAMLCLELWYSTILILLTGN                                                                                                                           |
| Wm82.  |  | MKDAEVQIDALSICINISGWEMMIAFGFMAAVSVRVANELGRENSKAAKFSIV                                                                                                                             |
| a2.v1  |  | VTVLTSFAIGFILFVLFLILREKVAYLFTSNEDVATAVGDLSPLLALSLLLNSIQPV<br>LSGVAVGAGWQSTVAYVNIGCYYLIGIPVGIVLGNIIHLQVKGIWIGMLFGTLIQ<br>TIILIIITYKTNWDEQVIIARDRINKWSKMLVDHETITSDN*                |
|        |  | MEGNLEKKLLSKEEVSEEDNLSLVKRVWEESKEMWIVAAPAIFTRFTTFGINVIS<br>QAFIGHIGSRELAAYALVFTVIIRFANGILLGMSSALSTLCGQAYGAKEYDMMG                                                                 |
| Glyma. |  | VYLQRSSIVLFLTALCLLPVFIFTSPILMLLGQDENIAQVAGTISLWSIPILFAYIVSF                                                                                                                       |
| 03G005 |  | NCQTFLQSQSKNVVIAFLAALSIIHVFLSWLLTIQFKFGIPGAMISTILAFWIPNIG                                                                                                                         |
| 400.1. |  | QLIFITCGWCDETWKGFSFLAFKDLGPVVKLSLSSGAMLCLELWYNTVLILLTG                                                                                                                            |
| Wm82.  |  | NMKNAEVEINALSICININGWEMMIALGFMAAAASVRVANELGRGSSQAAKFSI                                                                                                                            |
| a2.v1  |  | VVSVLTSFVIGFILFVLFLFLREKIAYLFTSNEDVVTAVGDLSPLLALSLLLNSIQPV<br>LSGVAVGAGWQSTVAYVNIGCYYLIGIPVGIVLGNIIHLEVKGIWIGMLFGTLVQ<br>TIVLTIITYKTNWDEQVTIARNRISKWYKVELDHETSTSDN*               |
|        |  | MWVVAAPAIFTRFSTFGINVITHAFVGHIGSRELAALVFTVLIRFGNSILLGM<br>GTALSTLCGQAYGAKEYGMMGVYIQRSWIVLSLTALCLLPLLIFAIPILTLLDQD                                                                  |
| Glyma. |  | ETIAQVAGTISLWSIPVLFSFIVSFTTQTFLQSQSKNIIIAFLAASFIVIHVFLSWLLT                                                                                                                       |
| 03G005 |  | MKFKLGIAGAMTSTSLALWIPNIGQLIFITCGWCYDTSKWKGFSFLAFKDLWPV                                                                                                                            |
| 500.1. |  | VKLSLSSLPTNGLELWYSTILILLTGNMEDAEVQIDALSICLNINGWELMISLGFM                                                                                                                          |
| Wm82.  |  | AAASVRVAKGSSKAAKFSIVVKVLTSAIGFILFFIFLFLKEKLAYIFTSSKDVADA                                                                                                                          |
| a2.v1  |  | VGDLSPLLAISILLNSVQPVLSGIPVGVVLGNVHLQVKGIWFGMLFGTFIQTIVL<br>IIITYKTNWDEQVIIARNHINKWSKVDSHHKIIPSEN*                                                                                 |
|        |  | MQGGVKEKLLIKEKKTSEQEEEEELSLVKRVWNEKVMWVVAAPGIFTRFSTFGI<br>NVISQAFIGHIGSRELAAYALVFTVLIRFANGILLGMASALSTLCGQAYGAKEYV                                                                 |
| Glyma. |  | MMGVHLQRSWIVMSITSLFLLPVFIFTRPILMLLGQDENIAEVAGNISLWSIPMIF                                                                                                                          |
| 03G005 |  | AFIASFTCQNFLQSQSKNTIISFLAASFIVIHVFLSWLLTIQFKLEIPGAMTSTNLAF                                                                                                                        |
| 600.1. |  | WIPNIGQLIFITCGWCSDTWKGFSFLAFKDLWPVVKLSLSSGIMLCLELWYNTIL                                                                                                                           |
| Wm82.  |  | VLLTGNMENAEVQIDALSICLNINGWEMMISLGFMAAASVRVANELGKGSSK                                                                                                                              |
| a2.v1  |  | AAKFSIVVTVLTSLAIGFVLFLFFLFLRGKLAYIFTSNKDVADAVGDLSPLLAISIL<br>LNSVQPVLSGVAIGAGWQSIVAYVNIGCYIIIGIPVGVVLGNVNLQVKGIWIG<br>MLFGTFIQTIVVLTIVITYKTDWDEQVTKARNRINKWSKVESDHETITSDD*        |
|        |  | MEGDLKQKLLRRRKEEEEEEEELSLAKRVWNEKVMWIVAAPAIFTRFSTFGIS<br>VISQAFVGHIGSKELAAYALVFTVLIRFANGVLLGMASALSTLCGQAYGAKEYG                                                                   |
| Glyma. |  | MMGVYLQRSWIVLFLTAVCLLPVFIFTSPILLLLGQDESIAQVAGNIALWSIPVM                                                                                                                           |
| 03G005 |  | FAFIVSFTCQTFLQSQSKNIIIAFLAASFIVIHVFLSWLLTMKFKFGIPGAMISAGL                                                                                                                         |
| 800.1. |  | AYWIPNIGQLIFVTCGWCSDTWKGFTFLAFKDLWPVVKMSLSAGAMLCLELW                                                                                                                              |
| Wm82.  |  | YNTILVLLTGNMKNAEVEIDALSICLNINGWEMMISLGFMAAASVRVANELGR                                                                                                                             |
| a2.v1  |  | GSAKAAKFSIIVSVLTSLAIGFLLFIFFLFFRERLAYIFTSNKEVAFAVGDLSPLLSVS<br>ILLNSVQPVLSGVAIGAGWQSIVAYVNMGCYYAIGIPVGIVLGNVLDLQVKGIW<br>IGMLFGTLIQTIVLIVITYKTNWDEQVTIAQKRISRWSKVDSPDHENEVERKNVS* |

|                                              |                                                                                                                                                                                                                                                                                                                                                                                                                                                                                                                                                                                                       |
|----------------------------------------------|-------------------------------------------------------------------------------------------------------------------------------------------------------------------------------------------------------------------------------------------------------------------------------------------------------------------------------------------------------------------------------------------------------------------------------------------------------------------------------------------------------------------------------------------------------------------------------------------------------|
| Glyma.<br>03G036<br>200.1.<br>Wm82.<br>a2.v1 | MCTGAESRGDINGDPVISKVGGGDYEDRMRTIELEGGGEERACNCGTFVQGGLL<br>QGIHHHLTALNLP TLSASELKEELQSLAKVACPIIMTSLMMYSRSASVSMFLGR<br>QGKVELAGGSLALGFANITANSVLKGLTMGMDPICCQAYGAKRWSVLNQFTL<br>RTLCLLLLVAIPISVLWLNMEPILQMLGQDPEVTKVAQVYMFVSIPELLAQAH<br>NPLRSFLRTQGLTTPVTIAASCAALLHLPINYLATYLN LGVKGIALATGLNSIN<br>MTLGLLLYILFSKKPLKPWQGATLLSAFHGWKPLL SLALPSCISVCLEWWWYEI<br>MLFLCGLLSNPQATVATMGILIQTLGFLYVFPFSLSIALTTRIGHSLGAGQASKA<br>QSTAMIGFFTAFTLGITAFILLFFVRKSWGKLF TNETQIIELVT TILPILGLCEVSNW<br>PQTVSCGILSGTARPYLGARINLC AFYLVLGPVSVFATFIYKYELVGLWSGMVAA<br>QASCLCMMVYTLIQTDWGQQCKRALELAQKATEQENKNDEESGLLGSDQ* |
| Glyma.<br>04G089<br>000.1.<br>Wm82.<br>a2.v1 | MCNPKPSSSSPFLCPTKNHIITPDPKLNHPPVDDQLKDELHRWPTPNEVIAEM<br>KAIGKISGPTALTGLILYSRAMISMVFLGYLGEMELAGGSLSIGFANITGYSVISGL<br>AMGMEPICGQAYGAKQLKTGLTLQRTVLLLLSTSLPISLTWLN MKNILLWCG<br>QDQQISSTAQTFIIFSIPDLFLLSLLHPLRIYLR TQSITLPLTYCSAISVLLHVPLNFL<br>LVVHFKMGVSGVAIAMVWTNLNLFIFLSSFVYFSRVYKDSWVPPSTDCLRGWSS<br>LLALAVPNCVSVCLEWWWYELMIILCGLLLNPKSTIASMGILIQTTALVYVFPSS<br>LSLAVSTRVGNELGANRPAKARISMIVSLACAV ALGVAAMLFTTLMRHRLGRF<br>FTSDREILHLTSIALPIVGLCELGNCPQTTGCGVLRGSARPTVGANINLGSFYLVG<br>MPVAVLLGFVVGKMGFPGLWLGLLAAQASCASLMIFVLCTTDWNAQVRRANE<br>LTNANSAPFKQTEYCNNVRLREIVATEDHDHEITNRPSHYTHYK*       |
| Glyma.<br>04G097<br>700.1.<br>Wm82.<br>a2.v1 | MDTSCQQKGFFTFLPQNITKAPHYCCPVIDNLRSEAKHMGNILNEGEHEHPLIK<br>SKLPPQPHGSNNHSLFQRSCSESKKLWHIAAPSIFTRLAMFSITVVTQSLAGHLG<br>DLDLAAISIACTVLISITFGFLLGMA SALETLCGQAYGAGQQRILGVYLQRSWV<br>LFLSSILLPVFIFATPVLKLIGQPVAVAEQAGLVAVWLIPLHLSFPFQFTLQRFLQ<br>CQLKTGIIAWVSGVALAVHVLVSWVFVYRMRIGIVGTALSIGFSWWLSVLGML<br>GYTLFGGCPRSWTGFSVEAFVGLWEFFKLSLASGVMLALENFYRLLIVSGYM<br>HNTEIAIDALSVCVTIYGWESMIPLAFLGATGVRVANELGAGNAKGARFATVV<br>SVVTTLFVGFI FVLVIVSFNKNLALIFTSSSSVIQMVNELAMLLAFTVLLNCIQPV<br>LSGVAVGSGRQAVVAYINIGSYYLIGIPLGVLLGWLLPSGIGMWTGMMSGTVV<br>QTLILAIITMRYDWEKEVQKAQILVEEEATFNDQ*                       |
| Glyma.<br>04G097<br>900.1.<br>Wm82.<br>a2.v1 | MGSLKGD SGHANGENLTEALLPTRDAQQQHQTDDEEQRF GDKLWLETRKLW<br>LIVGPSIFSRLASFTMNVVTQAFAGHLGDVELAAISIANNVLVGFNFGLLL GMA<br>SALETLCGQAFGAKRYHLLGIYMQRSWIVLFMCCFLLLPFYVFATPLLKFLGQP<br>DDVAEWSGVVAVWLIPLHFSFAFQFPMQRFLQCQLKTAVIAWVSLGLVNV<br>VTSWLFIYVWDFGLYGAAISLDISWWVLVFGMYAYIAYGGCPLTWNGFSLEAFS<br>GLWEFTLSSASGVMLCLENWYKILLMTGQLENATI AVDALSVCMTINGWE<br>MMIPLAFFAGTGVRVANELGAGNGKAAKFATQVSVAQSTIIGLIFCVLIMIFHE<br>HIAIYFTTSTSVLQAVDNMSLLLAITILLNSVQPVLSGVAVGSGWQAYVAYINIG<br>CYYLIGFPLGIIMGWVFKSGVIGIWGGMIFGGTAIQTLILIIVTIRCDWEKEEEKAC<br>FRVSKWSKSNNGNLEASN*                                            |
| Glyma.<br>04G102<br>100.1.<br>Wm82.          | MLITSCVTLCVRIPLCWVLVFKTRQNNVGGALAMSISIWSNVFFHGLYMRYSP<br>CAKTGAPIFMELFQRLWEFFRFAIPSAVMICLEWWPFELIILLSGLLLN PQLETSV<br>LSVCTRISNELGVGNPRGARVSVRAAMPFAVVETTIVSGTLFACRHVFGYIFSNE<br>KEVVD SVTLMAPLVCIWVILDNIQGVLAGVARGC*                                                                                                                                                                                                                                                                                                                                                                                 |

|                                              |  |                                                                                                                                                                                                                                                                                                                                                                                                                                                                                                                                                                                                                                                                                                                                                                                                                                                                                                                                                                                                                                                                                                                                                                                                                                                                                                                                                                                                                                                                                                                                                                                                                                                                                                                                                                                                                                                                                                                                                                                                                                                                                                                                                                                                                                                                                                                                                                                                                           |
|----------------------------------------------|--|---------------------------------------------------------------------------------------------------------------------------------------------------------------------------------------------------------------------------------------------------------------------------------------------------------------------------------------------------------------------------------------------------------------------------------------------------------------------------------------------------------------------------------------------------------------------------------------------------------------------------------------------------------------------------------------------------------------------------------------------------------------------------------------------------------------------------------------------------------------------------------------------------------------------------------------------------------------------------------------------------------------------------------------------------------------------------------------------------------------------------------------------------------------------------------------------------------------------------------------------------------------------------------------------------------------------------------------------------------------------------------------------------------------------------------------------------------------------------------------------------------------------------------------------------------------------------------------------------------------------------------------------------------------------------------------------------------------------------------------------------------------------------------------------------------------------------------------------------------------------------------------------------------------------------------------------------------------------------------------------------------------------------------------------------------------------------------------------------------------------------------------------------------------------------------------------------------------------------------------------------------------------------------------------------------------------------------------------------------------------------------------------------------------------------|
| a2.v1                                        |  | MESSRELAAPLLVLRKSGEQENNGVESTFCQEFKRVSSMAAPMVAVTVSQYL<br>LQVVSLMMVGHLLGILVSFSGVAIATSFAEVTGFSVLLGMSGALETLCCQTYGAE                                                                                                                                                                                                                                                                                                                                                                                                                                                                                                                                                                                                                                                                                                                                                                                                                                                                                                                                                                                                                                                                                                                                                                                                                                                                                                                                                                                                                                                                                                                                                                                                                                                                                                                                                                                                                                                                                                                                                                                                                                                                                                                                                                                                                                                                                                           |
| Glyma.<br>05G001<br>700.1.<br>Wm82.<br>a2.v1 |  | EYRKFGNYIWCAIVTLTLVCLPISLVWIFTDKILMLFSQDPEISHAAREYCIYLIPA<br>LFGHAVLQALTRYFQTQSMIFPMVFSSITALCLHVPICWGLVFKLGLRHIGAAL<br>AIGVSYWLNWVWLAIYMIFSPACQKTKIVFSSNALLSIPEFLKLAIPSGLMFCFEW<br>WSFEVLTLLAGILPNPQLETAVLSVCLNTTTLHYFIPYAVGASASTRVSNELGAG<br>NPKTAKGAVRVVVLGVAEAVIVSSVFISCRHVLGYAYSNDKEVIDYVAEMAPL<br>LCVSVTADSLIGALSGIARGGGFQEIGAYVNLGAYYLVGIPMGLLLGFHLQLRA<br>KGLWMGTLGSLTQVILAIVTALTDWHKEATKARERVVENSIVHYEA*<br>MRQLSPTSNPKVQDEPNMLATLIPKSPTCQQQQQMQRNHHNNNNNTTHLSLS<br>LNEAKCIANISFSMVL TGLLLYSRSMISMLFLGHLGELALAGGSLAIGFANITGYS<br>VLSGLAMGMEPICGQAFGARRFKLLGLTMQRTVLLLLVTSLISLFFWLNMRKI<br>LLLCGQEEDIANEAELYILSLPDLVLQSLHPLRIYLRQSITLPLTCCA AVSILL<br>HVPINYL FVSILKLGIKVALSAVVTNLNLVWLLIVYVVVSGTHKKTWPGISREC<br>FQGWNSWKTLMNLAIPSCVSVCLEWWWYEIMILLCGLLVNPHASVASMGLI<br>QTTALIYIFPSSLSFGVSTRVGNELGAGNPRRAKLAAMVGLCFSEVFGLSALAF<br>VSVRNWASMF TLDGQIIALTS AVLPIIGLCELGNCPQT TVCGVLRGTARPKLG<br>ANINLGCFYLVGMPVAVWLGFAGFDFKGLWLGMLAAQGSCMMTMMFVLA<br>RTNWEGQALRAKELTDSDSGEEKNLMEEEEQEEEGFLGSCATKEGSV*<br>MSATSKEGENLSTNDRANRHPSTPSSHTKKCPLNANFVKMVVEELRVQRGIAL<br>PLVAMNLAWFAKLAITTAFLGHLGELNLAGGALGFSFANVSGFAVLNGLSGA<br>MEPICGQAHGAKNVRLHKTLLMTTLLLLLVTPLSFLWLNVDKILILFGQQQE<br>ISIVAKTYVSYLPDLFIKALLCPLKAYLSSQCMTLPTMFSSAVALAFHIPVNILLS<br>KTMGLRGVSI AVVWTDLIVMVMLAIYVVVLERRNGSMLWKEGGWWDQNM<br>DWSRLIKLSGSCCLNTCLEWWCYEILLFLTGHLANAKQAVGVLAIVLNFDYLL<br>YAVMLSLATSVSTRVSNELGANRAGQAYKSARVSLAVSVISGCIGGSIMVAARG<br>VWGNLFSHQKGVVKGVEKAMLLMALVEVFNFVPTVCGGIVRGTGRPWLSMY<br>ASLGGFYFLTPLGVVFAFKLRFGLGLLIGLLIGIAACLVLLT FIVRINWVEEA<br>TKAQTFVCNAQVHEQVSRNEVNELTENPEGDQVCKETSITPYSCI*<br>MNLARFAKTAITTAFLGHLGELNLAGGALGFSFANVTGFSVLNGLRGAMETK<br>NVRLHKTLLMTTLLLLLVTPLSFLWLKVDKILIRFGQQQEISIVAKTYVSYLTP<br>DLLVTSLLCPLKAYLSSQCMTLPTMFSSAVTLAFHIPVNILLSKTMRLRGVSI<br>WINDLMVMVMLAIYVVILERRNGSMLWKEGGWWDQNMMDWIRLIKLSGSC<br>CLNTCLEWWCYEILVLLTGHLANAKQAVGVLAIVLNFDYLLYSVMLSLATCVS<br>TRSAVSVISVCIGGVVKGLKKTMLVIALVEVFNFVPTVCGGMVRGTARP*<br>MEGAAEKERLQCWSIRREVKAVVELAFPIGITALIFYARSMVSMFLGHLGELEL<br>AAGSLGMAFANITGYSVLSGLALGMEPMCSQAFGAKRVKVLSTLHRCVMFLL<br>VCSIPISLLWLNMSILLLLHQDPNITLMAHTYLIFSLPDLT HSFHPIRIYLRQ<br>GVTHPVTLASLAGTLLHLPFNLYLLVTRLRLGLAGVAAASAASNLSILLFLGA<br>AVCFTGLHCAAPSRDCFSGWKPLLRLAAPSCVSVCLEWWWYEIMILLCGILVDPTA<br>TVASMGILIQTTS LIYVFPSSLGFAVSTRVGNELGANRPSRAKLSAVVSVFLAAIM<br>GFSAMFFAVGMRRRWGRMFTADEDIIRITSMALPILGICELGNCPQTVGCGIVR<br>GMARPNTAANVNLGAFYLVGMPVAVGLGFWFDVGFCGLWLGLLSAQVCCA |

|        |                                                                                                                                                                                                                                    |
|--------|------------------------------------------------------------------------------------------------------------------------------------------------------------------------------------------------------------------------------------|
|        | GLMLYVIGTTDWEFEAHRAQWLTLVEDGVMDGQKQPLTSVVTEAPST*                                                                                                                                                                                   |
|        | MRIVREEVVEEVKRLWLA VPLFSVGILLHILQAISIMFVGHLGTLPLSGASMASF                                                                                                                                                                           |
| Glyma. | ASVTGFNLLPFYLFASSKL VIGVSYCTGHILWSIKWSRTVPYAWHTHAEIHACCF                                                                                                                                                                           |
| 05G243 | NDMIPSLFAYGILRCILKFLQTQKIVFPMVLTSGIAAVLHVLFCWLLVFKSGLAN                                                                                                                                                                            |
| 100.1. | RGAALANSISYWVNAILISLYVRFSSACKHSWTGFSKMALHNLLDFLKLEWTFK                                                                                                                                                                             |
| Wm82.  | LMVLMSGLLPNPKLETSVFSICLNTFGLGWMIPFGFSAAIETEYAIYSTHVCASF                                                                                                                                                                            |
| a2.v1  | VRCQVVSYIRFIVTIESTKSLMSTATINIKTPKEKEKKIIQPIKIQFTYLSSPKVYFFSS<br>AIYSNCSRKCPHTMFSMNSSILVSENVKNKNVQGGAE*                                                                                                                             |
|        | MCNPKPSSSSPFLCPTKNHIISTPDPKLINHPPPVDDQLQDELHRWPTPNEIVAE                                                                                                                                                                            |
|        | MKAIGKISGPTALTGLIISRAMISMVFLGYLGEMELAGGSLSIGFANITGYSVISG                                                                                                                                                                           |
| Glyma. | LAMGMEPICGQAYGAKQLKTLGLTLQRTVLLLLSSSLPISLTWLNMKNILLWCG                                                                                                                                                                             |
| 06G091 | QDHEISSTAQTFILFSIPDLFLLSLLHPLRIYLRQSITEPLTYCSAVSVLLHVPLNFL                                                                                                                                                                         |
| 100.1. | LVVHLKMGVSGVAIAMVWTNLNLFLLSSFIYFSGVYKDSWVPPSTDCLRGWSS                                                                                                                                                                              |
| Wm82.  | LLALSVPTCVSVCLEWWYELMIILCGLLLNPKATIASMGILIQTTSLVYVFPSSL                                                                                                                                                                            |
| a2.v1  | SLAVSTRVGNELGANRPAKARISMIVSLACAVALGVTAMLFTTLMRHRWGRFF<br>TSDQQILHLTSIALPIVGLCELGNCPQTTGCGVLRGSARPTVGANINLGSFYLVG<br>MPVAVLLGFVGKMGFPGLWLGLLAAQGS CAALMIFVLCTTDWNAQVQRANE<br>LTNANSAPSKLPTTECNNVRLPEILVMDTEDHHDEIITKTPSLETDPLIHTSK* |
| Glyma. |                                                                                                                                                                                                                                    |
| 06G099 | MASALETLCGQAYCAGHHRMLGVYLQRSWVVPVFHSDVAGVHFCHARVEV                                                                                                                                                                                 |
| 600.1. | NRETHCGGGTGGFSGALVDPFHLSFPFQFTLQRFLQCQLKTGIIAWVSGWLL*                                                                                                                                                                              |
| Wm82.  |                                                                                                                                                                                                                                    |
| a2.v1  | MEENLLVLAKSGGEEQKVAWEGLGEEMKRMIDIAGPMVVVTASQRLLQVVSV<br>MMVGHLNDDFLSSAALAISLTAVTGF5FLMGMASGLETICGQAYGAQQHKKI                                                                                                                       |
| Glyma. | GVQTYTAIFALT FVCLPFTFLWINMEKILVFIGQDPLIAKEAGKFIIWLIPALFAYA                                                                                                                                                                         |
| 06G103 | ILQPLVRYFQMQSLLLPMLMTSCVTLCVHIPLCWVLVFKTRLNNVGGALAMSIS                                                                                                                                                                             |
| 400.1. | TWSNVIFLGLYMRYSRCAKTRAPISMELFQGLREFFRFAIPSAVMICLEWWSFE                                                                                                                                                                             |
| Wm82.  | LIILLSGLLLNPQLETSVLSICLNTTSILYAIPFGIGAASTRISNELGAGNPHGAC                                                                                                                                                                           |
| a2.v1  | VSVLAAISFAIIE TT VSGTLFACRHVFGYVFSNEKEVV DYVTVMAPLVCISVILD<br>NIQGVLAGVARGCGWQHIGVYVNIGAFYLCGIPMAILSFFAKMRGKGLWIGV<br>QVGSFAQCVLLSTITSCINWEQQTIKARKRLFGSEFSADDRLI*                                                                 |
|        | MDSTSVHKDIDEPLLSEEPSSPQPPSFTQSFSSRHGSDGELERILSNTSVPFAKRI                                                                                                                                                                           |
|        | GPATWVELKFLFH LAAPAVIVYLYNYVMSMSTQIFSGHLGNLELAAASLGNTGI                                                                                                                                                                            |
| Glyma. | QVFAYGLMLGMGSAVETLCGQAYGAKKFNMLGIYLRSTVLLTLAGILLTIYIF                                                                                                                                                                              |
| 06G305 | SEPILIFLGESPRIASAAALFVYGLIPQIFAYAINFPIQKFLQAQSIVAPSAYISAATL                                                                                                                                                                        |
| 200.1. | LVHLVLSYVVVYKVGLGLLGASLVLSVSWWIIVIAQFVYIVKSERCKHTWRGFSF                                                                                                                                                                            |
| Wm82.  | QAFSGLAEFFKLSAASAVMLCLETWYFQILVLLAGLLPHELALDSLSICTTFSG                                                                                                                                                                             |
| a2.v1  | WVFMISVGFNAAA SVRVSNELGARNPKSASF SVMVVTLSIFIISVIVALVVLAI RD<br>IISYAFTDGEEVAAA VSDLCPLLALSIVLNGIQPVLSGVAVGCGWQTFVAYVNV<br>GCYYGIGIPLG SVLGFYFKLSAKGIWLGMLGGTVLQTHILVWVTFRTDWNNEVE<br>EAAKRLNKWENKTEPLVN*                           |
| Glyma. | MEEGSETGKWGW MKRRRAMREELKKVGTIAAPMVVASVLQYLLQVVSLVMV                                                                                                                                                                               |
| 06G318 | GHLNQLSLSTVAIATSLTNVSGFSVLSGMAGGLETGGQAFGAGQYEKFGQYT                                                                                                                                                                               |

|        |                                                                                                                                                                                                                                                                                                                                                                                                               |
|--------|---------------------------------------------------------------------------------------------------------------------------------------------------------------------------------------------------------------------------------------------------------------------------------------------------------------------------------------------------------------------------------------------------------------|
| 700.1. | YTAVISLSLICFPITILWTFMDKILTLLGQDPTISLEARKYAIWLIPALFGSAILKPLT                                                                                                                                                                                                                                                                                                                                                   |
| Wm82.  | RFFQTQSLISPMILTSAIALCFHGATCWTLVFKLELGHVGA AISFSLCVWFNVML                                                                                                                                                                                                                                                                                                                                                      |
| a2.v1  | LLSFVRYSSACEKTRIPFSKNALVGVGDFFRFAVPAAVMVCLKWWACEILVLLA<br>GLFPNPKLETSVLSICLTISTLHFTIPYGFGA ASTRVSNELGAGNPQAVRVAVSA<br>TMFLAVTEGLIVSATLFGCRHILGYAYSDDRMVVHYVAVMTPLLCLSIFTDSLQ<br>GVLSGVARGSGWQH LGAYVNLGAFYLVGIPVGIVLGFVAHLRAKGLWIGIVTG<br>SIVQSILLSLVTALTNWKKQAMMARERIFDVKPPDENESNHMTSA*<br>MGIWRNEISEEAKKQLWLSGPMVVFVSFQYSLQMISLMFVGHLDELLLAGVSL<br>ATSFVNVTGFSVLLGMSSALDTFCGQSYGAQQYH MVGIHMQR AIVII MLATIP |
| Glyma. | MSFIWAYLRPILVVLHQDKTIAAQAQLYATYLIPSLSANALLRCITKFLQTQNIV                                                                                                                                                                                                                                                                                                                                                       |
| 07G099 | LPMMLASGFTTLAHALLCWLLVLKFG LGIKGAAIAFCISNWLNTVLLALYIRFSS                                                                                                                                                                                                                                                                                                                                                      |
| 900.1. | SCKSTWTGFSRESLQNIPQFLSLAFPSALMVCLEQWTFQIMVLLSGALPNPKLQT                                                                                                                                                                                                                                                                                                                                                       |
| Wm82.  | SVLSICFNTTGLFWMIPFGVSVA ASTRISNELGAGCPKAAYLAVKVTLMSFVVG                                                                                                                                                                                                                                                                                                                                                       |
| a2.v1  | ALGFILLMVTRNIWGHIFTNIPEVIRYVASMTPILASSVFVDSIQTALSGIVRGCG<br>WQKLGA FVN LGSYYLVGLPFAIVLAFVLHIKGEGLLLGIVIALTMQVVGFVLITL<br>RTNWEKEANKAAKRIRSNGVPTDANALPSDQN*<br>MALWKEEAKKQLWLAGPMVVFVSFQYSLQVISLVFVGHLDELLLASTSLATSF<br>VNATGFNVLMGMSSALDTFCGQAYGAKQFHMLGVHTQGAMLVLT LVTIPLSI                                                                                                                                  |
| Glyma. | IWVFLGPILVALHQDKEIAAHAQLYARYLIPSLSANGLLRCITKFLQTQNIVFPM                                                                                                                                                                                                                                                                                                                                                       |
| 07G100 | VLATGLTSFLHFFLCWVLVQKVGLGIKGS AIAICISNWFNTIILALYIKLSPSCKTT                                                                                                                                                                                                                                                                                                                                                    |
| 000.1. | WTGFSKESLHNIPKFLKLAFFSTLMVCLESWTFEIMVLLSGALPDAKLQTSMLSI                                                                                                                                                                                                                                                                                                                                                       |
| Wm82.  | CLNTSGIFWMIPFGISAAGSTRISNELGAGSPKAAYLAVKVTMFLASAVGILEFA                                                                                                                                                                                                                                                                                                                                                       |
| a2.v1  | SLMILWRVWGRVFTNVHEVVKYVTSMMPLVASSTFIDS IQTAFQGVARGCGW<br>QKLGA YVN LGSYYFLGVPFSVVS AFV FHMKGQGLFLGILIALTVQVVCFLVTL<br>RANWEKEAKKA AKRVGGDGVQLGDLPCDQNANTA*<br>MGIWDKEIADEVTKQLWVAGPMICVCVCQYSLQMMSLMFVGHLDELLLAGA<br>SLATS FVNVTGFNVLMGMSSALDTFCGQGRAMLV LILVTIPVSIH VVFLGPILVA                                                                                                                               |
| Glyma. | LHQDKEIAAQAQQYARLLIPSLSANGLLRLLHILLCWTFVLKLGLGFKGSVIAIC                                                                                                                                                                                                                                                                                                                                                       |
| 07G100 | ISNWFNTILLTYIRFSPSCKTTWTELDL FSLGGILNNPVDFCLEAWTFEIMVLLS                                                                                                                                                                                                                                                                                                                                                      |
| 100.1. | GALPNAKLQTSVLSICLNTTGIFWMVPFEVSAAGSTRISNELGAGRAKAAYLAV                                                                                                                                                                                                                                                                                                                                                        |
| Wm82.  | KVTMFLASAVGILEFAALLVRRVWGRAFTNVHEVVTYVTSMPIVASSPFIDSI                                                                                                                                                                                                                                                                                                                                                         |
| a2.v1  | QTAFQGVARGCGWQKLGAFFNLGSYYFLGVPFAIVTAFVLHMKGQGLLLGIVL<br>ALIVQVVCFLVVT LR TNWEKEANKAATRVGGSIVQVEHIKLS*<br>MCESEKSEQRHDDKEKQTEELGGVLT RRSTIMWDVIGEAKSLWELAFPTALTGLI<br>FYARSMVSMFLGLH LGDTELAAGSLAIAFANITGYSVLSGLSLGMEPLCSQAFG<br>AKRPKLLSLTLQRCVIFLLFSSIPISLLWLNMSKV FILLHQH THITQMAQTYLVFL                                                                                                                   |
| Glyma. | LPDLVTNSFLHPIRVYLRAQNITHPVTLASLAGTLLHVPFNLLL VQRGLPGVAA                                                                                                                                                                                                                                                                                                                                                       |
| 07G124 | ASAASSFSILSLLVLYVWISGVHLATWTAPSRECFGGWEPLRLAAPS CVSVCLE                                                                                                                                                                                                                                                                                                                                                       |
| 600.1. | WWWYEIMILLCGVLVDPTASVAAMGIFNPDDVVDLCLPLVSGICGFHARGEPA                                                                                                                                                                                                                                                                                                                                                         |
| Wm82.  | WREQGPRARMSAVVAVFFAAVMGFS AVVFATAMRRRWGRMFTGDEGILRLT                                                                                                                                                                                                                                                                                                                                                          |
| a2.v1  | AAALPILGLCELGNCPQT VGC GVVRGTARP NVAANVNLGAFYLVGMPVAVG<br>LAFWLEVGF CGLWLGLLSAQVCCAGLMLYMIGTTDWEYQACRAQLLTALDQ<br>GSDGHKQPLLA AVDNNNS*                                                                                                                                                                                                                                                                        |
| Glyma. | MASSLSTTSFLCTHSLKSPTLKPLTKPHCFARFRARVRVPPKASSQNNNNANNS                                                                                                                                                                                                                                                                                                                                                        |



|        |                                                                                                                                                                                                                                                                                                                                                                                                                                                                                                                                                                                                                                                                                                                                                                                                                                                                                                                                                                                                                                                                                                                                                                                                                                                                                                                                                                                                                                                                                                                                                                                                                                                                                                                                                                                                                                                                                                                                                                                                                                             |
|--------|---------------------------------------------------------------------------------------------------------------------------------------------------------------------------------------------------------------------------------------------------------------------------------------------------------------------------------------------------------------------------------------------------------------------------------------------------------------------------------------------------------------------------------------------------------------------------------------------------------------------------------------------------------------------------------------------------------------------------------------------------------------------------------------------------------------------------------------------------------------------------------------------------------------------------------------------------------------------------------------------------------------------------------------------------------------------------------------------------------------------------------------------------------------------------------------------------------------------------------------------------------------------------------------------------------------------------------------------------------------------------------------------------------------------------------------------------------------------------------------------------------------------------------------------------------------------------------------------------------------------------------------------------------------------------------------------------------------------------------------------------------------------------------------------------------------------------------------------------------------------------------------------------------------------------------------------------------------------------------------------------------------------------------------------|
| 07G156 | VETPSLQPSSPKPPYNSSSSLLRHFSNGWFKFDELGMEIVLIALPAALALAADPIA                                                                                                                                                                                                                                                                                                                                                                                                                                                                                                                                                                                                                                                                                                                                                                                                                                                                                                                                                                                                                                                                                                                                                                                                                                                                                                                                                                                                                                                                                                                                                                                                                                                                                                                                                                                                                                                                                                                                                                                    |
| 100.1. | SLIDTAFVGHIGAVELA AAVGVSA SVFNLVSKAFNVPLLNVTTSFVAEEQALIRKE                                                                                                                                                                                                                                                                                                                                                                                                                                                                                                                                                                                                                                                                                                                                                                                                                                                                                                                                                                                                                                                                                                                                                                                                                                                                                                                                                                                                                                                                                                                                                                                                                                                                                                                                                                                                                                                                                                                                                                                  |
| Wm82.  | EESILSDENGKDQSKLLPSVSTSLALAAATLGIAETVVLTLGSGILMNIMGIPADS                                                                                                                                                                                                                                                                                                                                                                                                                                                                                                                                                                                                                                                                                                                                                                                                                                                                                                                                                                                                                                                                                                                                                                                                                                                                                                                                                                                                                                                                                                                                                                                                                                                                                                                                                                                                                                                                                                                                                                                    |
| a2.v1  | PMRGPAEQFLTLRAFGAPAIVLALAAQGTFRGFLDTKTPLYAVGVGNFLNAIL<br>DPILIFLFGLGIGGA AVATVISEYLIAFILLWKLSDKVLLIPSEFDGRKFFSYLKSGG<br>LVSARTLAVFITVTLSTSVAAQQGPIPMAGHQICMQVWLSVSLNDALALAGQ<br>ALLARNYSLGNYEQARLVYIRVIQIGLGAGITLSIILFFGFGAFSSLFSTDSEVLDV<br>AWSGIWVAVAGSQPVNALAFVIDGIYYGVSDFGYAAYSMLVGLVSTFLLVAAP<br>VGLPGVWTGLFIFMALRVLAGVWRLSSKSGPWDTIWYRDGAED*<br>MLAEQKSQNTYPTVTEVLEEAKRMTDIGFPIAAMSLVGYLKNMTLVVCMGRL<br>GSLELAGGSLAIGFTNITGYSVLSGLAMGMEPLCTQAFGSRNFSLLSLTLQRTIL<br>MLLLFSLPISLLWLNLESLMLCLRQNPDITRVATLYCCFAIPDLIANCFLHPLRIY<br>LRSKGTTWPLLWCTLISILLHLP TLTLFTLNLGVPGIAISSFVANFSNLFLLLY<br>MFYTRVRKESLHVPLLMPRHMSHNVTTCSSSTIAKEWGVLMKFISQSCLAVCL<br>EWWWYELMTISAGYLHNPRVSLATAGIVIQTTSMLMYTLPTALSASVSTRVGNEL<br>GAGQGERARLSTVVAIGLALVSSIFGLLWTTMGRERWGRVFTSDSEVLQLTMA<br>VLPIIIGLCELANCPQTTSCGILRGSARPGVGAVINFCSFYLVGAPVAIVLAFYWK<br>LGMVGLCYGLLAAQIACVVSIFVVVYKTDWERESLKATCLVGKSSCGTFAYED<br>QTAVKCEGVVFLHNSEK*<br>MGSKTEEVVDYTLMEGAVEKEGQHCWSIRREVKA VGELAFPIALTALIFYARS<br>MVSMLFLGHLGELELAAGSLGMAFANITGYSVLSGLALGMEPLCSQAFGAKRV<br>NVLSLTLHRCVMFLLLC SIPISLLWLNMSNILVDLLHQDPNITLMAHTYLLFSLP<br>DLLTHSFLHPIRIYLRAQGVTHPVTLASLAGTLLHLPFNILLVTRLRLGLAGVAA<br>ASAASNLSILLFLGA AVFFSGLHCSAPSRECLSGWKPLLRLAAPSCVSVCLEWW<br>WYEIMIILCGLLVDPTATVASMGIQITSLIYVFPSSLGFAVSTRVGNALGANRPS<br>RAKLSAVVSVFLAAIMGFSAMFFAVGMRRRWGTMFTADEDILRITSMALPILGI<br>CELGNCPTVGC GVVRGTARPNTAANVN LGAFYLVGMPVAVGLGFWFDVGF<br>CGLWLGLLSAQVCCAGLMLYVIGTTDWEFEAHRAQLLTLVEDGVMDGQKQP<br>LTGVVTETPSS*<br>MDREDQKASLLSQLIHITVEDRLKVDNIQRNKDKQQAIERAELYEEVRKQLWL<br>AGPLISVSM LNYSQQIISVMFVGHLGQLPLSGASMATSFASVTGFSLLVGMASAL<br>DTLCGQSYGAKQHMLGIHMQRAMLVLMIVSINLAFIWANTRSILVALGQDP<br>EISAEAGQYAQLMIPSLFAYGILQC LNRFLQTQNI VFPMVFSSGVTTLLHILICWT<br>MVFKSGLGNKGAAIAN AISYWINVLILILYVKFSPSCSKTWTGFSKEALHGIPSFL<br>KLAIPSALMVCLEMWSFEMMVLLSGLLPNPKLETSVLSICLNTSTSVWMIPFGLS<br>GAVSTRVSNELGAGHPRAARLAVYFVFIMAIIEGTFVGAVMIIRNIWGYAYSNE<br>AEVVQYVAIMLPILATSIFLDALQCVLSGTARGCGWQKKGAFINLGSYYLVGIPS<br>AILFAFVLHIGGKGLWLGII CALVVQVSCLLIITRTDWEQEAKKV KDRVYDSMR<br>AEVIVS* |
| Glyma. | MRIGREEVVEEVKRLWLAVPLFSVGILQYILQAISVMFIGHLGTLPLSGASM ASS                                                                                                                                                                                                                                                                                                                                                                                                                                                                                                                                                                                                                                                                                                                                                                                                                                                                                                                                                                                                                                                                                                                                                                                                                                                                                                                                                                                                                                                                                                                                                                                                                                                                                                                                                                                                                                                                                                                                                                                    |
| 08G050 | FASATGFNLLLGLATALDTFCGQSNGAGQYHMLGIHMQRSMLVVLMM SVFLS                                                                                                                                                                                                                                                                                                                                                                                                                                                                                                                                                                                                                                                                                                                                                                                                                                                                                                                                                                                                                                                                                                                                                                                                                                                                                                                                                                                                                                                                                                                                                                                                                                                                                                                                                                                                                                                                                                                                                                                       |
| 700.1. | IIWYNTEPILKAMHQDKAISKEAGSYTQYMIPSLFAYGLLQCILKFLQTQKIVFP                                                                                                                                                                                                                                                                                                                                                                                                                                                                                                                                                                                                                                                                                                                                                                                                                                                                                                                                                                                                                                                                                                                                                                                                                                                                                                                                                                                                                                                                                                                                                                                                                                                                                                                                                                                                                                                                                                                                                                                     |
| Wm82.  | MVLTSGIAAVLHVLLCWLLVFKSGLGIKGAALANSISYWINVILISLYVRFSAC                                                                                                                                                                                                                                                                                                                                                                                                                                                                                                                                                                                                                                                                                                                                                                                                                                                                                                                                                                                                                                                                                                                                                                                                                                                                                                                                                                                                                                                                                                                                                                                                                                                                                                                                                                                                                                                                                                                                                                                      |
| a2.v1  | KHSWTGFSKMALHNLLDFLKLAAPSAVMHCLKVWTFELMVLM SGLLPNPKLE                                                                                                                                                                                                                                                                                                                                                                                                                                                                                                                                                                                                                                                                                                                                                                                                                                                                                                                                                                                                                                                                                                                                                                                                                                                                                                                                                                                                                                                                                                                                                                                                                                                                                                                                                                                                                                                                                                                                                                                       |

|                                              |                                                                                                                                                                                                                                                                                                                                                                                                                                                                                                                                                                                                                                                                                                                                                                                                                                                                                                                                                                                                                                                                                                                                                  |
|----------------------------------------------|--------------------------------------------------------------------------------------------------------------------------------------------------------------------------------------------------------------------------------------------------------------------------------------------------------------------------------------------------------------------------------------------------------------------------------------------------------------------------------------------------------------------------------------------------------------------------------------------------------------------------------------------------------------------------------------------------------------------------------------------------------------------------------------------------------------------------------------------------------------------------------------------------------------------------------------------------------------------------------------------------------------------------------------------------------------------------------------------------------------------------------------------------|
|                                              | TSVLSICLNTFGLAWMIPFGFSAAVSVRVSNELGSGNPQAASLAVRVVLSMALIE<br>GVILVSAMILLRNVWGHVYSNDKEVIRYVSFMMPVLALSSFLDGIQGTLSGILA<br>GCGWQKIGAYVNLGSFYLVGVPCAVVLAFIVHMKAKGLWMGIIFAFIVQVSLY<br>IITFRTNWEEQARKAQRRVELITIPPTTRDSVLPHQKQELVP*                                                                                                                                                                                                                                                                                                                                                                                                                                                                                                                                                                                                                                                                                                                                                                                                                                                                                                                        |
| Glyma.<br>08G244<br>400.1.<br>Wm82.<br>a2.v1 | MAYGGGGFAISYPLAKALHIISWIVLFLTAICLLPLFIFTSPILTLLGQDESITEVAR<br>TICICSIPILFSYIVSNNCQTFQLQSQSNVVISFLAALSIIHVLSLWLFTMQFKYGIPR<br>AMISTILAYWIPNIGQLIFITCDWCPETWKGFSLAFKDLWPASKLSISFGAMLS*<br><br>MEDHDDQTHPLLTRRHHTPDSSAVVFTATSDDIAPIGGAGDFAREFFAESKKL<br>WYLAGPAIFTSVCQYSLGGVTQVFSVHVNTLALAAVSVENSVIAGFSLGITFGM<br>08G282<br>600.1.<br>Wm82.<br>a2.v1                                                                                                                                                                                                                                                                                                                                                                                                                                                                                                                                                                                                                                                                                                                                                                                                |
| Glyma.<br>09G042<br>700.1.<br>Wm82.<br>a2.v1 | GSALETLCGQAYGAGQVHMLGVYMQRSWVILNATAILLSLLYIFAGHMLRAIG<br>QTEAISAAAGEFALWMIPQLFAYAVNYPQKFLQAQSRIMVMAWIAAAAALVL<br>HTLFSWLLILEFGWGLVGAADVNLASWWFIDIAQLVYIVSGACGEAWSGFTFK<br>AFHNLWGFVRLSLASAVMLCLEVWYFMALVLFAGYLKNAEVSVDALSICMNI<br>LGWTIMVSFGMNAAVSVRVSHELGAHPRTAKFS<br>MVAEGKSQKPYPTAAEVVEELKRMGDIGVPIAAMSLAGYIKNMVLVVCMGRL<br>GSLELAGGALAIGFTNITGFSVLSGLAMGMEPLCTQAFGSRNFSLVSLTLQRTIL<br>MLLAASLPISLLWLKLEPLMLWLHQNPETIKVASVYCCFFSIPDLIANSFLHPIRIYL<br>RSKGTTPWPLLWCTLLSILIHIPVAFFTFKLHLGVPGIAMSFAFVANFNTLFFLLSY<br>MLYMRVSKGSLSMPLLLSSTCQLPSPSPQQQQQHHHQDQTSKTTTLGKEWG<br>MLIRFSIQSCLGVCLEWWYEFMTILAGYLYNPRVALATAGIVIQTTSMLYTLPT<br>ALSASVSTRVGNELGAGQPERAKLSTIVAIGLSLASSILGLLWTTIGRERWGRVFT<br>SDSEVLELTMSVLPPIGVCELANCPQTTSCGILRGSARPGVGAGINFYSFYLVGAP<br>VAIVIAFVWKLGLVGLCYGLLAAQIACVVSILVVVYNTDWERESMKAKSLVGIF<br>KSSCDHDDHHYGDQTVKCEEGLLSFSMRKNSDQKK*<br>MVINIKQAYFFILMDIMDENGSSSNAPKNKRNLPSVSVFFKDARHVFKMDSIAKE<br>ILGIAFPSALAVAADPIASLIDTAFIGHLGPVELAAAGVSIALFNQASRITIFPLVSI<br>TTSFVAEENTIEKINTEKKLSDKAKSKEQVMLDDHSLQDIEKVASKENNETENV<br>EMNDCNTSICKSTSDTSSSSSNKSVPKDGRKKRHVASASTALLFGTILGLLQATT<br>09G102<br>800.1.<br>Wm82.<br>a2.v1 |
| Glyma.<br>09G134<br>000.1.<br>Wm82.<br>a2.v1 | LIFAAKPLLAAMGLKPDSPMLNPAIKYLRLRSLGAPAVLLSLAMQGIFRGFKDT<br>TTPLYVILSGYALNVILDPVLIFYCKLGIKGAASHVLSQYLMALALMVILTRKVD<br>LVPPSIKDLQIFRFLKNGGLLLARVIAVTFQCQTLAASLAARFGPIPMAAFQTCLQ<br>VWLTSSLLADGLAVAVQAILACSF AEKDYEKVLVAATR TLQMSFVLGVGLSFA<br>VGFGLYFGAGIFSKSVLVVHLIRIGLPFVAATQPINSLAFVFDGVNYGASDFAYS<br>AYSLVTVSLASVASLFLLSKSKGFVGIWIALTIYMSLRMFAGVWRMGTGTGPWR<br>FLRGRSMS*<br>MTILSTSLTSIYAGHIGDIELSSIALYQGVMSAIYFYLLFGMSSALATLCGQAFGA<br>GQIQSTCIYVQRSWIILTATCTILLPIFVYATPILKLLGQDEGIAELAGRYSIQVHR<br>QKNPTFAYFGFGLCGLPDLRSCCCGTSSTSSCWCCWSCYVGDGGSVHVLGLVT<br>SCISLTSVLHCQLAPSSKMTSLEMINCFESVIPYMFSAIAFPVQRFLLAQSKVKVI<br>MCIAFVDLLIQNGLPYIFINVFGWGVTS LAITANIVGWLYAVALVYITIDWCRE<br>KWISLQSSVMNCLEQWYITCIMLHAGLLDNPNVIGVGSYSICFNIQGWDDMLLL<br>GINTVICIGSIPSKCSCLQYAWQVAAIYSFCMKMFLSLLL GILFMTVIFFSKDEFAK                                                                                                                                                                                                                                                                                                                                      |

---

|        |  |                                                                                                                                                                                                                                                                                                                                                   |
|--------|--|---------------------------------------------------------------------------------------------------------------------------------------------------------------------------------------------------------------------------------------------------------------------------------------------------------------------------------------------------|
|        |  | IFTDSEDMILADSDLAHLLGVTIVLNSASQVMMSGVAIGSRWQVMVGYNLACY<br>IVGLPIGIFLGFKLHLGVKGLWGGTMCSSILQILVLFTHLTKTKWSKEMEQT<br>MRLWSNNITTSKMLYEREQCGVI*                                                                                                                                                                                                         |
|        |  | METPLVVQNFTSEADYFPVKSLKDVKFVLWAETVKIWRIALPVALTHLFQVLT<br>NSSTSIYAGHLGDIELSSISVSQGVMSYIFQLFGMSSALATLCGQAFGAGQIQS                                                                                                                                                                                                                                   |
| Glyma. |  | TCIYVQRSWIILTATCIILLPIYIYATPILKLLGQDEGIANLAGRYSIQVIPHMFSAI                                                                                                                                                                                                                                                                                        |
| 09G134 |  | VFPTLRFLQAQSKVKVIMCIAFVLLIQNGLLYIFINIFGWGITGLAMVSNIGWL                                                                                                                                                                                                                                                                                            |
| 100.1. |  | YAGALVYITISWCKEEWSGFSWMAFRDLLAFKLSLQSSVMGCLEQWYMTCI                                                                                                                                                                                                                                                                                               |
| Wm82.  |  | MLLAGLLDNPIAVGSYSICFSVQGWHFMLLLGISTAISVRISNALGMSQPRAA                                                                                                                                                                                                                                                                                             |
| a2.v1  |  | KYTFCVTMFQSLLLGVLFMNVIFLTKEDFAIIFTNSEDMIQAVADLAYLLGVTM<br>VLNSASQVMMSGVAIGSGWQVMVAFINLACYIYIVGLPIGYFLGFKQHLGVKGLW<br>GGTMCGLVQILILLIRKTNWTKEVEQTAHRMRIWNVNNFRSDLAENVT*<br>METPLVTEKFTSESDYLPVKSLKDVKFVLWTETVKIWRIAFPMAISALFQFLT<br>TSIYAGHIGDIELSSISVYQGVISALYFYLLFGMSSALVTLGQAYGAGQIQSTCIY                                                       |
| Glyma. |  | VQRSWIILTATCIILLPIYVYATPILNFIGQDQEIADLAGRYSIQVIPYMFSCAIAFP                                                                                                                                                                                                                                                                                        |
| 09G134 |  | FQTFQSQIKVKVITICIALAVLIQNVLLYIFINVFGWGTTGLAMVTNIIGWVYA                                                                                                                                                                                                                                                                                            |
| 200.1. |  | AALVYITIGWCKEWTGFSWMAFRDLWSFAKLSLASSVMSCLDQWYSTCIILL                                                                                                                                                                                                                                                                                              |
| Wm82.  |  | AGLLDNPIDVGSYSICFNVQGWHSMLLLGISAAISIRVSYILGKSHPRAAIYSFC                                                                                                                                                                                                                                                                                           |
| a2.v1  |  | VTMFQSLLLGIVFMTVIFLSKDEFKIFTNKDMIRAVADLAYLLGVSMVINSAS<br>HVMGSAVGSGWQVMVGYNLACYIYIVGLPIGIFLGFNQHLGVKGLWGGTM<br>CGRILQMLVLLVIIWKTNWSKEVEQTAHRMRIWSINNLHSDAMGNVT*<br>MCHPTLDVTSNCKCCSTSPDCPISIKDPLISKNNQNNNTSSLPPPPPPQHNNNTT<br>TTTTTKTKPPPPPPSTTTTKTKATTSKPHNFPESIKEVFSISKIAIPMILTGLLLYC<br>RSMISMLFLGHLGELALAGGSLAVGFANITGYSILSGLAVGMEPICGQAFGAKR |
| Glyma. |  | FTLLGLCLQRTILLLLFTSLPITLLWLYMKQILLLCGQDEAIATQAQQYLVSIPD                                                                                                                                                                                                                                                                                           |
| 09G146 |  | LIAQSFLHPLRIYLRQTSLPLTLCASFSILLHIPINYFLVAHLKLGKVALGGV                                                                                                                                                                                                                                                                                             |
| 800.1. |  | WTNENLVASLILYIVFSSTHKKTWGGFSFECFTQWKSLLNLAIPSCVSVCLEWW                                                                                                                                                                                                                                                                                            |
| Wm82.  |  | WYEIMILLCGLLVNPVKATVASMGIQTTSLLYIFPSSLFSVSTRVGNKLGAQKP                                                                                                                                                                                                                                                                                            |
| a2.v1  |  | SKARLSAIVGLSCSFMMSGVLALFFALMVRNTWASMFTKDKIITLTSMVLPILGLC<br>ELGNCPQTTGCGVLRGTARPKVGANINLGC FYLVGMPVSIWLAFFTG YDFQGL<br>WLGLLAAQGS CAVTMLVVL CRTDWEFEAQRAKLTGMGV DHNHHEVDDPE<br>KPLKHESKEDSLLLADSDENEQ*                                                                                                                                            |
| Glyma. |  | MKRPLPPSVSSDNVEDRKMKKKVKALDTTMMWSAWRASMFDDNLLFEVLKHI                                                                                                                                                                                                                                                                                              |
| 09G178 |  | DTSDVGMHKQAVTQGS HVIESEGMMDFLVGLLVFWRRVSLEASTFEIIVLLTGA                                                                                                                                                                                                                                                                                           |
| 700.1. |  | LPNSKLQTSVLSICLNTTG VFWMV PFGVSVAGSIRISNELGDGSAKAAYLAVKV                                                                                                                                                                                                                                                                                          |
| Wm82.  |  | TMFLGSAVGILEFAVLMLVRKVWGRAFTNIHEVATYVTAIPIVASSAFIDSIQTA                                                                                                                                                                                                                                                                                           |
| a2.v1  |  | FQGVARGCDRQKLGALINLGSYLLGV PFAIVTACVLHTKGQVKSSH FVIIKKD<br>LTINNILKKGIVLALIVQVVCFLVVTLR TKWEKEVSCPIFNSVAMLSFINYGY*                                                                                                                                                                                                                                |
| Glyma. |  | KMALWKEEAKKQLWLAGPMV FVS VFQYSLQVISLMFVGHLD ELLASASLATS                                                                                                                                                                                                                                                                                           |
| 09G178 |  | FVNATGFNVLMGMSSALDTFCGQAYGAKQFHMLGVHTQGAMLVLT LVTIPLS                                                                                                                                                                                                                                                                                             |
| 800.1. |  | IIWVFLGPILVALRQDKEIAAHAQLYARYLIPSLSANALLRCITKFLQTQNI VFTM                                                                                                                                                                                                                                                                                         |
| Wm82.  |  | VLASGLTSLHFFLCWALVQKIELGIKGS AIAICISNWFNTIILALYIKLSPSCKTT                                                                                                                                                                                                                                                                                         |
| a2.v1  |  | WTGFSKESLHNIPRFLRLAFPSTLMVCLESWTFEIMVLLSGALPNAKLQTSVLSIC<br>LNTSGIFWMIPFGISAAGSTRISNELGAGSPKAAYLAVKVTMFLASAVGILEFASL                                                                                                                                                                                                                              |

---

---

|                                              |                                                                                                                                                                                                                                                                                                                                                                                                                                                                                                                                                               |
|----------------------------------------------|---------------------------------------------------------------------------------------------------------------------------------------------------------------------------------------------------------------------------------------------------------------------------------------------------------------------------------------------------------------------------------------------------------------------------------------------------------------------------------------------------------------------------------------------------------------|
|                                              | MLLWRVWGHVFTNVHEVVKYVTSMMPLVASSTFIDSIQTAFQGVARGCGWQ<br>KLGAYVNLGSYYFLGVPFSVVSFAVFHMKGQGLFLGILIALIVQVVCFLLVTLRA<br>NWEKEIEI*                                                                                                                                                                                                                                                                                                                                                                                                                                   |
|                                              | MKRVSQRQEVVEEMKKQAWLAGPLFTVGVQLQYSLQVISVMFVGHLLGELPLSGAS<br>LATSFASVTGFNLLMGMASALDTLCCQSFGAGQHHMLGIQMQRATFVLSFVS                                                                                                                                                                                                                                                                                                                                                                                                                                              |
| Glyma.<br>09G178<br>900.1.<br>Wm82.<br>a2.v1 | VFLAIMLVFTKHILVAMHQQVAIAEEAGVYAIYMIPSLFAYGIFQCCLKFLQTQ<br>NIVFPMVLSSAVVALLHIPLCWVLVIKSGIGSKGAAIANSVSYWLVNLLIGFYVK<br>FSSCAKTWTGFSVKALQNIPEFLKISIPSACMLCLKAWTFELMVLLSGLLPNPQ<br>LETSVLSICLNTFVIAWMIPFGLSCAVSTRVSNELGAGHPQAASLAVRVALFLVL<br>ADGIMMVLVMILLRKIWGNLYSSDTHVIKYVAAVMPILATCSFLDGIQSVLSGI<br>ARGSGWQKIGAIVNLGSFYFVGVPSSVVLAFVLHMKGKGLWLGVSAFIVQVIL<br>FGVITIRTSDWKEANKAAMRVKDTKIPQELPQRDPFTITEMN*                                                                                                                                                      |
|                                              | MERGDQONQSASLQSPLIKHSHSSSSSGRGIERREVIEEVKKQLWLAGPLISVTLLNF<br>CLSIISVMFVGHLLGELSLSGASMATSFASVTGFSLLVGMASSLDTFCGQSYGAKQ                                                                                                                                                                                                                                                                                                                                                                                                                                        |
| Glyma.<br>09G179<br>000.1.<br>Wm82.<br>a2.v1 | YHMLGIHLQRAMFTLMIVSIPLAIIWANTRSILTFLGQDPEIAAEAGSYARFMLP<br>SLFAYGLLQCLNRFLQTQNIWFPMCMSSAITLLHVLICWILVFKSGLGNRGAA<br>VANSISYWLVNTILSLYVMFSPSCAKSWTGFSKEALHNIPSFVRLAIPSAVMVCL<br>EMWSFELMVLLSGLLPNPKLETSVLSICLNTTAAAWMIPFGLSGAGSIRVSNELG<br>AGRPWNARLAVRVVLVLAIEGIIIVGTVMILVRNIWGYAYSNEVEVVEYVATMF<br>PILAAASNFLDGLQCVLSGTARGCGWQKIGAFVNLGSYYIVGIPSSIVFAFVLHIG<br>GKGLWLGIICALIVQMCSLMIITRTDWDQEAKKATDRVNSVTLESLS*                                                                                                                                              |
|                                              | METPLMFNSDLNSTGTTELQYAPEGLVDTNNGDYTEMSSGLADFKNVFSVESVK<br>LWTIAAPIAFSILCNYAVNSFTTIFVGHLLGDLELSSVLSLSVSNFSFGFLGMA<br>SALLETLCGQAFGAGQVEMLGVMQRSWLILLGACICLTPIIYIAEPILLLLQGEPE<br>IAELAGVFTIQSIPQMFSLAINFPTQKFLQAQTKVGFLAWVGFGAFIFHIILLWILL<br>KVLALGTTGAAYSTTAWVIALAQTAYVIGWCKDGRGFSWLAFKDLWAF<br>VKLSVASAVMLCLEVWYFMILIVLTGHLDNAVIAVGSLSICMTINGFEGMLFIGI<br>NAAISVRVSNELGSGRPRAAKYSVIVTIESLVIGLICAAIILITKDHFIIFTESKEM<br>IKAVSKLAGLLGLTMILNSVQPVISGVAVGGGWQALVAYINLFCYYIMGLPLGF<br>LLGYKLGVRVEGIWVGMICGTILQTLILLYIVYKTNWNKEVELASSRMRKWTGQ<br>EIEINLANSQQPVTH* |
|                                              | MCTGAESRGIVDGNNPVTNSKVGGVYHEINGMRSTEGGDGEGKRNSGCSGRFI<br>QGLHQHLHQLLKALFPTLSLSEVKEELKSLANACPMMMTNVLLYSRAISMLY<br>LGRQGKVELAGGSLAIGFANITANSFLKGLTMGMDPICCQAYGAKRWSVLSQT<br>FCKTLCLLLLVAIPISLLWLNMAPLLHWLGQDPEVTKVAQVYVMVFSIPELLAQV                                                                                                                                                                                                                                                                                                                             |
| Glyma.<br>09G276<br>100.1.<br>Wm82.<br>a2.v1 | HLNPLRSFLRTQGLTTPLTIAASFAAILHLPINYLATYLELGVKGIALATGLNSI<br>NMILGLVLYLVSEKPLKPWEGVTILSSFHDWRPLLTLALPSCISVCLEWWCYEI<br>MLFLCGLLSNPQTTIATMGVLIQTTGFLYVFPFSLAALTTQIGHSLGAGQPSRA<br>QNTAKIGLFIAFALGVSAFVFLFVRNVWGKLFTNETQIVDMVTAILPILGLCEI<br>GNWPQTAACGILSGTARPYVGARINLCAYLIGLPVAIFAFAFMHRYQLRGLWF<br>GMLAAQISCFCMMVYTLVQTDWGHQSRRAEQLAQTTDEENVNNDKSGLLD<br>SDL*                                                                                                                                                                                                  |
| Glyma.<br>10G099                             | MLPLLMLFSSIRNAFSSDELGLEILNISLPTTLALAADPIASLIDTAFIGHIGPVELA<br>AVGVSAIFNQISKITIIPLSVTTSLVAEEDAVDEQNQQSEREMLMKVSNEVDK                                                                                                                                                                                                                                                                                                                                                                                                                                           |

---

|        |                                                                                                                                                                                                                                                                                                                                                                                                                                                                                                                                                                                    |
|--------|------------------------------------------------------------------------------------------------------------------------------------------------------------------------------------------------------------------------------------------------------------------------------------------------------------------------------------------------------------------------------------------------------------------------------------------------------------------------------------------------------------------------------------------------------------------------------------|
| 900.1. | LDVHDHAEKAGNSSSANVGRVAKLDHDKSYIPSASSGIVIGLLGVLQALFLIF                                                                                                                                                                                                                                                                                                                                                                                                                                                                                                                              |
| Wm82.  | TAKPMLSYMGVDSNSPMFKPAQQYLTLRSFGAPAVIISMAIQGVFRGIKDTKTP                                                                                                                                                                                                                                                                                                                                                                                                                                                                                                                             |
| a2.v1  | LYATVMGDVTNIILDPLLMFVLRLLGVNGAAISHIISQYLIAMLLWSLMKQVVLL<br>PPSIQDFRFGKILKNGFLLLIKVASATFCVTLSTSLAARKGSTTMAAFQICLQIWM<br>ATSLADGLAVAAQAIISAFARDDYKKVIASASRVLQLGLILGLVLSVLLLSLL<br>PFASRLFTNDINVLQLISIGIPYVAATQPINALAFVFDGVNYGASDFTYSAYSMIM<br>VALVSILSLYMLSSSLGFTGIWIALLIYMTLRIFAGFWRIGTGSGPWSFLKENSVEL<br>Q*                                                                                                                                                                                                                                                                        |
| Glyma. |                                                                                                                                                                                                                                                                                                                                                                                                                                                                                                                                                                                    |
| 10G231 | MITVFLSKDNLAIFTSSKDMQLTVADQAYLLGLTMIINSAAQLMSGVAIGSGW                                                                                                                                                                                                                                                                                                                                                                                                                                                                                                                              |
| 800.1. | KLTVAYINLTCYYMVGLPLGFYLVSH*                                                                                                                                                                                                                                                                                                                                                                                                                                                                                                                                                        |
| Wm82.  |                                                                                                                                                                                                                                                                                                                                                                                                                                                                                                                                                                                    |
| a2.v1  | MDAPLLLAKGEGAALVTENG DYVAVRELKEVKVFWIETKRVWQIAMP IVFNI<br>WCQFGVNSVTSMFVGHLGDIQLSAISLINSVIGTFAFGFMLGMGSATETLCGQA<br>FGAGQVNMLGVYMQRSWVILSVTSILLPIYIFAGPILKFLGQQEDIADLAGSFSI<br>LVIPQFLSLPFNFPTQKFLQAQSKVNIIAWIGLVALILHIGMLWLLIYVLD FGLAG<br>AALAFDITSWGITVAQLVYVVIWCKDGWTGLSWLAFKDIWAFVRLSLASAVM<br>LCLEVWYMMSVIVLAGNLDNALVAVDSLICMNINGWEAMLFIVNAAVSVR<br>VSNELGLGHPRAAKYSVYVTVFQSLFLGIFFMAIILATRDYIAIFTNSEVLHKAV<br>AKLGYLLAVTMVLNSVQPVVSGVAIGGGWQALVAYINIGCYLFLGLPLGFLLG<br>YEANLGVEGLWGGMICGIVIQTLLLLLLILYKTNWKKEVEQTTERMRIWGGQDI<br>GVDKIVAST*                                 |
| Glyma. |                                                                                                                                                                                                                                                                                                                                                                                                                                                                                                                                                                                    |
| 10G232 | MCHISSQLPCKCNSMKSQEAEEESDMKITNPLIQKDITVTPPHHHVLKELISISKIA<br>LPMILTGLLLYCRSMISMLFLGRLGELALAGGSLAVGFANITGYSILSGLAVGME<br>PFCGQAYGAKKFTLLGLCLQRTILLLLFTSIPISLLWLYMKHILLCCGQDEAIATQ<br>AQSYLLYSIPDLLAQSFHLPLRIYLRQSITLPLTLCATFSILLHIPINYLLVSHLNW<br>GIKGVALSGVWTNFNLIASLILYVFSGTHKKTWGGFSFECFTQWKSLLDLAIPS<br>CISVCLEWWWYEIMILLCGLLVNPRATVASMGIQTTSLYILPSSISFSVSTRVG<br>NKLGAQKPSKAKLSAIVGLSCSFMLGFLAFVFTILVRNIWASMFTQDKEIITLSTL<br>VLPII GLCELGNCPQTGCGVLRGTARPKVGANINLGCFYLVGMPVAVWLGF<br>AGLDFQGLWLGLLAAQGSCAVTMLVVMSTQDWDVEALRAKKLTSVVVAVD<br>DSKEVGAEKPPKAEIKEDSLLSLADSEEDKQSWV* |
| Glyma. |                                                                                                                                                                                                                                                                                                                                                                                                                                                                                                                                                                                    |
| 10G239 | MEENLIITKQSEKQRTWDGLGEEMKRIIRVAGPMVFVYASQNLLQVVSIMMIG<br>HLNDELFLSGAALAI SLATVTGFSLLTGMASGLETICGQAYGARQYQKTGVQTY<br>TAIFSLTCVCLPLTIIWISLENILVFIGQDPLIAHEAGNFIIWLLPALFAYAILQPLV<br>RYFQM QSLLPMLATSCVTLCLHIPLCWALVFKTELSNVGGALAMSISIWL NVI<br>300.1.                                                                                                                                                                                                                                                                                                                                |
| Wm82.  | FLVLYMRYSPACEKTRAPVSMELFQGIWEFFRFAIPSAVMICLEWWSFELLILLSG<br>LLPNPQLET SVLSICLNTISTLYAIAFGIAAASTRISNELGAGNPHSARVAVLAS<br>a2.v1                                                                                                                                                                                                                                                                                                                                                                                                                                                      |
|        | MSFAIMEATIISGILFVCRHVFYGTFSNKKEVVDYVTVMAPLVCISVILDNIQGV<br>AGIARGCGWQHIGVYVNLGAFYLCGIPVAASLAFLAKMSGKGLWIGLQVGAF<br>VQCALLSTVTSTCNWEQQAMKARKRLFDSEISAENILV*                                                                                                                                                                                                                                                                                                                                                                                                                         |
| Glyma. |                                                                                                                                                                                                                                                                                                                                                                                                                                                                                                                                                                                    |
| 10G267 | MEENLLAKQREKQKVTWDGLGEEMKRIICIAVPMVIVTATQYLLQVVSIMMVG<br>HLNNNLYLSGAALAI SLATVTGFSVLGMA SGLETICGQAYGAQQYEKGVQ                                                                                                                                                                                                                                                                                                                                                                                                                                                                      |

|        |                                                                                                                                                                                                                                                                                      |
|--------|--------------------------------------------------------------------------------------------------------------------------------------------------------------------------------------------------------------------------------------------------------------------------------------|
| 400.1. | YTAIFSLTVVCLPLTFIWISMEKILVFIGQDPLIAQEAGKFLIWLVPALFAHAIMQ                                                                                                                                                                                                                             |
| Wm82.  | PFVRYFQMQLSLLPMLISSCVTLCHIPLCWALVFQTMNNIGGALAMSISIWLN                                                                                                                                                                                                                                |
| a2.v1  | VTFLGLYMRYSPACAKTRAPISMELFQGIWEFFRFAIPSAVMICLEWWSFELLILL<br>SGLLPNPQLETSVLSICLNTISTLFSIPFGIAAASTRISNELGAGNPHAAHVAVL<br>AAMSFAMETAIVSGTLFVCRHDFGYIFSNEKEVVVDYVTVMAPLICISVILDSIQG<br>VLAVARGCGWQHIGVYVNLGAFYLCGIPVAATLAFLAKMRGKGLWIGVQV<br>GAFVQCILFSTITSCINWEQQAIAKARKRLFDSEISADNRLV* |
| Glyma. |                                                                                                                                                                                                                                                                                      |
| 10G267 | MSFTITEATIVSGTLFACRHVFGYIFSNEKKVVVDYVTVMAPLICISVILDSIQGVLA                                                                                                                                                                                                                           |
| 600.1. | GVARGCGWQHIGVYVNLVAYYLCGIPVAASLAFLEKMRGKGLWIGVQVGAFAV                                                                                                                                                                                                                                |
| Wm82.  | QCVLLSIITSCINWEQQAIAKARKRLFDSEFPADNRLV*                                                                                                                                                                                                                                              |
| a2.v1  |                                                                                                                                                                                                                                                                                      |
|        | MEESLVKKHEQERV TWGVYSEEMRRVCHIAGPMVAVVSSQYLLQVVSTMIVG<br>HLGELYLSSAAL AISLSGVTGFSLLMGMASGLETICGQAYGGQQYQRIGIQTYYTA                                                                                                                                                                   |
| Glyma. | IFSLILVSIPVSLLWINMETILVFIGQDPLISHEAGKFTIWLVPALFAYAILQPLVRY                                                                                                                                                                                                                           |
| 10G267 | FQIQSLLLPMFASSCVTLIIHVPLCWALVFKTSLSNVGGALAVSISIWSNVIFLVLY                                                                                                                                                                                                                            |
| 700.1. | MRYSSACAKTRAPISMELFKGMWEFFRFAIPSAVMVCLEWWSYELLVLLSGLLP                                                                                                                                                                                                                               |
| Wm82.  | NPQLETSVLSVCLNTIATLYTIPFGIGAASTRVSNELGAGNSHAARVAVLAAM                                                                                                                                                                                                                                |
| a2.v1  | SLAVIETSIVSATL FACRNVFGYIFSNEKEVVVDYVTAMAPLVCISVILDSIQGVLTG<br>IARGCGWQHIGVYVNLGAFYLCGIPMAALLAFLVRLGGKGLWIGIQSGAFVQ<br>CILLSIITGCINWEKQAIAKARKRLFDEKISADNRLV*                                                                                                                        |
|        | MKRVGYLVGPMITVTL SQYFLQIISMVMVGHGLKLALSSTAIAISLCAVSGFSLIF<br>AMSCALETQCGQAYGAHQYRKFVQMYTAIVSLTLACLPLSPLWVYLGLKILIFL                                                                                                                                                                  |
| Glyma. | GQDPLISQEAGKFALCMT PALFDYATLQALVRYFLMQSLTPNEKTCISHLFNSL                                                                                                                                                                                                                              |
| 10G267 | VISSITLCFHVAFCWLLVFKFGFNLGAFFIGTSYWLVNILLVLYMKFSIECKK                                                                                                                                                                                                                                |
| 800.1. | TWVPISTELFHGIGEFFRCAIPSAGMICLEWWSFELLFLLSGLLPNPELETSVLSIC                                                                                                                                                                                                                            |
| Wm82.  | LSVTTTIYTIPEAIGSAASTRVSNALGGGSPQLAQVSVSAAMTLAASAAAILVSSIIF                                                                                                                                                                                                                           |
| a2.v1  | ACRQVVGYA FSNELDVVDYFTMVPLLSISVILDTLHDTLSGIARGCGWQHRG<br>AYVNLDAYYVVGPIAAILGFCLQLRGKGLWIGILTGAFCQTMVSLITSCTNW<br>EKQVCLHFQVHALHLAQS*                                                                                                                                                 |
|        | MCQLSSSPSTLCDSNEGHPNMPTTKIHEEPAHMLPLLPKPPTTLFEQGQNNHQ<br>TKTHFSLALNEVKCIANIALPMVLTGLLLYSRVISMLFLGRV GELALAGGSLAI<br>GFANITGYSILSGLAMGMEPICGQAFGAKRFKLLGLAMQRTIVLLLLTSVLISFL                                                                                                          |
| Glyma. | WLNMMKKLLILCGQQEDIAEAQSFILFSIPDLVAQSLLHPLRIYLRQSITLPLTYT                                                                                                                                                                                                                             |
| 11G026 | ASLSILLHVPINYFLVSVLKLGIKGIAGAVWTNFNLVVSLILYI WVSGVYKKTW                                                                                                                                                                                                                              |
| 300.1. | PGVSLKGILSGWKSLLNLAIPSCISVCLEWWWEIMILLCGLLINPQATVASMGV                                                                                                                                                                                                                               |
| Wm82.  | LIQTTALYIFSSLSFAVSTRVGNELGAENPKKAKVAALVGLCISYGLGFSALFF                                                                                                                                                                                                                               |
| a2.v1  | AVSVRQAWASMFTRDAEIIALTSMVLPIIGLCELGNCPQTTVCGVLRGTARPKL<br>GANINLGC FYLVGMPVAVRLSFFAGFDKGLWLGLLAAQASCMFTMLIVLART<br>NWEQVQRAKELTSSSEEQDQNCFFSSCATKEYCSDSLLV*                                                                                                                          |
| Glyma. | MGFRSGFDEL RVQRGIALPMVAMNLA WFAKTAITTAFLGRLGELSLAGGALGF                                                                                                                                                                                                                              |
| 11G028 | TFANVTGFSVLNGLCGAMEPIYVDRMLTLLMTISLLLLVSLPITFLWLVNDKILIL                                                                                                                                                                                                                             |
| 900.1. | FGQQQDISTVARTYVSLIPDLFVASLFCPLKAYLSSQTITLPTMFSSAVALAFHIP                                                                                                                                                                                                                             |
| Wm82.  | INIVLSRTMGLRGISMAVWITDLIVVLLAIYVLILERKKESMWKEGGWWDQSIE                                                                                                                                                                                                                               |

|                                              |                                                                                                                                                                                                                                                                                                                                                                                                                                                                                                                                                                                                            |
|----------------------------------------------|------------------------------------------------------------------------------------------------------------------------------------------------------------------------------------------------------------------------------------------------------------------------------------------------------------------------------------------------------------------------------------------------------------------------------------------------------------------------------------------------------------------------------------------------------------------------------------------------------------|
| a2.v1                                        | DWIRLLKLCGSCCLNTCLEWWCYEILVLLTGHLTNAKQAVGVLAIVLNFDYLL<br>FSVMLSLATCVCTRVSNELGANQAGLAYRSACVSLALGFISGCIGSLVMVAARG<br>IWGPLFSHDVGIKGVKKTMLLMGLVEVFNFPLAVCGGIVRGTARPWLGMYA<br>NLGGFYFLALPLGVVSAFKLRLGLVGLFIGLLTGIVTCLTLLLVIARLNNWVEEA<br>AQAQTLTGQEQVKELSKYDAEELIDAHKKDVV*<br>MAFKLKSPLLCSLHSPSRQNPNSTLSNHHFSRRFFAPSIPPTLCLSGAASASTFH<br>RHRFFVTARSQDEDQITEALEQEEEEKDNEEISRQGEKKELAKQGIWDQIKEIVMF<br>TGPATGLWICGPLMSLIDTAVIGQRSSIELAALGPATVVCDYMCYVFMFLSIATS                                                                                                                                                   |
| Glyma.<br>11G112<br>100.1.<br>Wm82.<br>a2.v1 | NMVATALAKQDKEEVQHHSVLLFVGLSCGIAMLLFTRLFGAAIITAFTGPKNV<br>HVVPAASNYVKIRGLASPALLVGWVAQSASLGMKDSLGPLKALAAATVINVA<br>GCVLLCTYLGYGIVGAAWATMVSQVVASYMMIQNLNMKGYNALAFSIPSGKE<br>LLTIFGLAAPVFITLMSKVAFYALLIYFATSMGHTMAAHQVMVQTYLMCTVW<br>GEPLSQTSQSFMPELIYGVNRSLSKARMLLRSLVIGAILGLLGLIIGTSVPWLPNI<br>FTPDRMVIQEMHKVLIPYFIALAVTPPTVSLEGTLLAGRDLKFISLSMSGCFCVGS<br>LVLWALSSRYGLLGCWFSALFQWARFSMALQRLLSPKGILYSEDTEQYKLLKL<br>RTA*<br>MALKLSSLSLHSSLRHQHHPNSSHSNHRIPLRFFAPSLPPTSCLSGAASVSTFHRTL<br>FAVTVRAFQSQDESKSSDVFEDEEKDEEISRQGEKKELAKQSIWSQIKEIVMFTGP<br>ATGLWICGPLMSLIDTAVIGQRSSIELAALGPATVVCDYMSYVFMFLSIATSNMV |
| Glyma.<br>11G112<br>200.1.<br>Wm82.<br>a2.v1 | ATALAKQDKEEVQHHSVLLFIGLSCGVGMLLFSRLFGASLITAFTGPKNNAHV<br>PAASNYVKIRGLAWPALLVGWVAQSASLGMKDSLGPLKALAAATVINFAGCI<br>LLCTYLGYGIVGAAWATMVAQVVAAYMMIQNLNMKGYNALAFSIPTGKEIL<br>MILGLAAPVFLTLMSKVAFYALLIYFATSMGHTMAAHQVMVQTYGMCTVW<br>GEPLSQTAQSFMPELIYGVNRSLSKARLLLSLVITIGAMLGLLGLIVGTSVPWLF<br>PYVFTPDRMVIQEMHKVLIPYFIALAITPPTHSLGTLLAGRDLKFISLSMTGCFC<br>VGTLLVLWALSSRFGLGCVFSLALFQWARFSIALRRLLSPKGILYSEDTDQYKLR<br>KLRTA*                                                                                                                                                                                      |
| Glyma.<br>11G133<br>900.1.<br>Wm82.<br>a2.v1 | MSLILGLALAFLLGTGLHFGAKLFTKDVNVLHLIRIEIPFVAATQSLNSLAFVFD<br>GINFGASDFAYS AISLDAVAIVSIICLLILSSASGFIGTWIAMTIYMDLRAIVGFLRI<br>GTRSGPWELLNY*<br>MDSTSVHKDIDEPLLVSNEPSPEPPSCTQSFSSKHGSDGELERILSNTSVPFAKRL<br>GPATWVELKLLFHLAAPA VIVYLINYVMSMSTQIFSGHLGNLELAAASLGNTGI                                                                                                                                                                                                                                                                                                                                             |
| Glyma.<br>12G099<br>300.1.<br>Wm82.<br>a2.v1 | QVFAYGLMLGMGSAVETLCGQAYGAKKFDMLGIYLQRSTVLLTLAGIILTIYIF<br>SEPILIFLGESPRIASAAALFVYGLIPQIFAYAVNFPIQKFLQAQSIVAPSAYISTATL<br>LVHLVLSYFVVYEVGLGLLGASLVLSVSWWIIVIAQFVYIVKSEKCKHTWRGFSF<br>QAFSGLPEFFKLSAASAVMLCLETWYFQILVLLAGLLPHELALDSLSICTTVSG<br>WVFMISVGFNAAASVRVSNELGARNPKSASFVSVVVTLSFIISVIVALVVLAIIRD<br>VISYASQTVKRWLLLSQIFVLYLLFLLFSTAFNLSYLGWLLDVDGKLLLRM*                                                                                                                                                                                                                                             |
| Glyma.<br>12G122<br>000.1.<br>Wm82.          | MEQVDLVPPSIKHLQLDRFLKNDKGMSASLVARQGPTSMAAFQAILAGAFAN<br>KDFDKATATASRVLQRHTLCKCDALFVILHMGLVLGLALAFILGTGLHFGAKIF<br>TQDANVHHLIQIGIPFVAVTQPLNSLAFVFYGINFGASDFAYS AFSMVVVAILSII<br>CLLILSSVGGFIGIWVALTIYMGLRAFAGFWRIGTGSGPWFEFLRSS*                                                                                                                                                                                                                                                                                                                                                                            |

|                                           |                                                                                                                                                                                                                                                                                                                                                                                                                                                                             |                                                                                                                                                                                                                                                                                                                                                                                                                                                                                                                                                                                                               |
|-------------------------------------------|-----------------------------------------------------------------------------------------------------------------------------------------------------------------------------------------------------------------------------------------------------------------------------------------------------------------------------------------------------------------------------------------------------------------------------------------------------------------------------|---------------------------------------------------------------------------------------------------------------------------------------------------------------------------------------------------------------------------------------------------------------------------------------------------------------------------------------------------------------------------------------------------------------------------------------------------------------------------------------------------------------------------------------------------------------------------------------------------------------|
| a2.v1                                     | MGSAEKEPLLTAEGTRSNSKHESSSHGQLERILSDDTLPFLNRVGPATWIELKLL<br>FFLAAPAVIVYLINYLMSMSTQIFSGHLGNLELAAASLGNTGIQMFAYGLMLG<br>MGSAVETLCGQAFGAQKYGMLGVYMQRSTILLSLAGVVLTVIYVFSEPMFLFLG<br>Glyma. 12G194<br>000.1.<br>Wm82.<br>a2.v1                                                                                                                                                                                                                                                     | ESPRIASAAALFVYGLIPQIFAYAANFPIQKFLQAQSIVAPSAYISAATLVVHLGM<br>SWVAVYEIGLGLLGASLVLSLWWIMVIGQYVYIVKSERCRTWQGFTWEAFSG<br>LYGFFKLSAASAVMLCLETWYFQILVLLAGLLPNPELALDSLSICTTISGWVFMIS<br>VGFNAAASVRVSNELGARSPKSASFVSVVTVISFIISVIAALVVLALRDVISYAFT<br>GGEEVAAA VSDLCPLLALSLVLNGIQPVLSGVAVGCGWQAFVAYVNVGCYYG<br>VGIPLGAVLGFYFQFGAKGIWLGMLGGTVMQTIILLWVTFRTDWTKEVEEAAK<br>RLTKWEDKKEPLLN*                                                                                                                                                                                                                                 |
| Glyma. 12G225<br>600.1.<br>Wm82.<br>a2.v1 | MLGIYLQGSCIISLIFSIIISIIWFYTEPILVLLHQSPDIARTAALYMKFLIPGVFAYSF<br>LQNISRFLQTQSVVMPLVALSALPLLIHIGIAYGLVQWPGLSFAGAPLAASISQW<br>ISMLLLALYVMYAKKFKQAWQGFSMHSHFYVFTNMKLALPSAAMVCIRLLVL<br>VFLAGLLPDSQITTSLIAICLNTQFIAHMPVPVGLGAAERLVEEFASVTPLLAISIVL<br>DAVEGVIQGVARGCGWQHSTGLWIGLICGQLCQVGTFLFLRRRAKWTKNLS<br>GVKDKEHPLVV*                                                                                                                                                        | MDENGCSNEPNNKWKMPFLVFFRDARLIFKLDALSREILGIAFPAALAVVADPI<br>ASLIDTTFIGHLGPVELAAAGVSIALFNQASRITIFPLVSITTSFVAEEDTIQRLINK<br>ETETDNIENTITKENVEAPKKFKGETDESNNVVAKSTFTSGDVEKLATGNMGI<br>NNENVTSTKSKPKVGKKRIASASTALLFGTILGLLQTAILTFAAKPLLYAMGLK<br>HDSPMLIPAEKYLRLRSIGSPAVLLSLAMQGIFRGFKDTTTPPLYVIVSGYAFNVLL<br>DPILIFYLKLGLKGAAMAHVISQYMMAITLLLLLMKRVHLVPPSIKDLQIFRFLK<br>NGGLLLTRVSVTFCMTLAASLAARLGSIPMAAFQPGQLIWLASSLLADGLAV<br>AVQTMLACSF AEKDYNKATAAATRTLQMSFVLGVGLSFAVALGLYFGPGIFSK<br>NANVVHLIKISMPFVAATQPINSLAFVFDGVNYGASDFAYSAYSLVLVSLVSIPIE<br>ILLFRSKQFVGIWIALTIYMILRMLVGIWRMGTGTGPWYYLRKGPWCYMRGHS<br>LP* |
| Glyma. 12G237<br>400.1.<br>Wm82.<br>a2.v1 | MDENRSSNEPNNKWKMPFLVFFKDARNVFKLDALSREILGIALPSALAVSADPIA<br>SLIDTAFIGRLGPVELAAAGVSISSLNQASRITIFPLVNITTSFVAEEDTIQKLNTK<br>AAENGNSKAKFGETIVPEDHMLQDMEKGT PKVMNTDAPTEFREDKDESQEYN<br>ATGNNDTNIGDGANTICKFSSVTSSKSKDKVGKKKRLIASASTALLFGTILGLI<br>QAAVLIFATKPLLGVMGVKRDS PMLKPAESYLRLRSFGAPAVLLSLAMQGIFRG<br>FKDTTTPPLYVIVSGYALNVILDPIFIFTLKLGKGAIAHVLSQYMMAF TLLLILM<br>KKVHLLPPRIKDLQIFRFLKNGGLLMLKVIAVTFCVTLATSLAARLGSIPMAAFQ<br>TCLQVWMTSSLLADGLAVAVQAILACSFTEKDYKKQQQQQQGHCK* | MENVEIQIEEIEKMOVASSSEGTGVPLL RASDNNGRDQNTRSPQAEGWWNKV<br>LDMEEAKHQLLFS LPMILTNLFYHLIILVSVMLVGHLGELQLAGATLANSWFSV<br>TGVAVMVGLSGALETLCGQGFGAKEYQMLGIYLQASCIISLIFSIIISIIWFYTEPIL<br>VLLHQSPDIARTAALYMKFLIPGVFAYSFLQNILRFLQTQSVVIPLVVL SALPMLV<br>HIGVAYGLVQWSGLSFTGAPVAASISLWISLLLLALYVMYAKKFKQTWKGFSTH<br>SFRYVFTNMRLALPSAAMVCLEYWAFEVLVFLAGLMPDSQITTSLIAICINTEFIA<br>YMITYGLSAAASTRVSNELGAGNPERAKHAMSVTLKLSLLGLCFVLALGFGH<br>NIWIQFFSDSSTIKKEFASVTPLLAISILLDAIQGVLSGVSRGCGWQH LAAYINLA                                                                                                                        |



|                                              |                                                                                                                                                                                                                                                                                                                                                                                                                                                                                                                                                                                                                         |
|----------------------------------------------|-------------------------------------------------------------------------------------------------------------------------------------------------------------------------------------------------------------------------------------------------------------------------------------------------------------------------------------------------------------------------------------------------------------------------------------------------------------------------------------------------------------------------------------------------------------------------------------------------------------------------|
| Glyma.<br>13G275<br>500.1.<br>Wm82.<br>a2.v1 | TFYLIGLPISCFLGFKTNLQYKGLWIGLICGLLCQSGTLFLFIRRAKWTKLDLSRD<br>NDKERPLVV*                                                                                                                                                                                                                                                                                                                                                                                                                                                                                                                                                  |
|                                              | MKEEIEKMVASNSSDDSIGTPLVIRGSDNNGRDQNTRLHQVEGWWNKVLDME<br>EAKCQLLFSPLMILTNTFYYLITSISVMLVGHLGELQLAGSTLANSWFNVTGSAV<br>MVGLSGALETLCGQGFGAKEYQMLGIYLQASCIISLIFSIIISIIWFYTEPILVLLHQ<br>SHDIARTTALYMKFLIPGLFAYSFLQNILRFLQTQSVVMPLVALSAPLLIHIGIA<br>YGLVQWPGLSFTGAPVATSISQWISMLLLALYVMYAKKFKQTWQGFMSHSFHY<br>VFTNMKLALPSAAMVCLEYWAFEVLVLLAGLLPDSQITTSLIAICLNTQFIAYM<br>VPVGLGAAGSTRVSNELGAGNPEQAKHAMNVTVKLSFLFSFCFALALGFGHNI<br>WIQLFSGSAKIKEEFASMIPLLAISIVLDAVQGVMMQGVARGCGWQHSTVYINLA<br>TFYLVGLPISCLLGFKTNLHYKGLWIGLICGLLCQVVTLFLFLRLAKWTKLDLSG<br>DKDKDHPLVV*                                                               |
|                                              | MLKSRLDGTVTHFTPLLDVSHHKENTRQYRWWNSKILDLEEAKHQLLFSLPM<br>FLTNLFYLLIVLVSVIFAGHLGDLQLAGATLANSWFVTGLAVMIGASYFNNEK<br>QDKILDLEEAKHQLLFSLPMFLTNLFYLLIVLVSVIFAGHLGDLQLAGATLANS<br>WFSVTGLAVMVGLSGALETLCGQGFGAAEYQMLGIYLQASCIISLIFSIIISIIWFY<br>TEPILVLLHQSQDIARTTSLYTKFLIPGLFALSFLQNILRFLQTQSVVNFIGAPVAV<br>SISLWISIPLLVMYIMYAERFRQWTGFSFESFNIFYTDLKLALLSAAMVCFEYWA<br>FEIMVFLAGLLPDPTISTSLIAICTNTELIAYLITYGLSAAASTRVSNELGSGHLDR<br>AKHAMGVSLKLSLLLGLCFVLALAFGHNIWIQMFSDSSKIKEELASLTPFLSISIL<br>LDSVQGVLSGVIRGCGWQHLLAAYVNLATFYLIGLPISGLLGFKFNLQVKGLWIG<br>LICGLACQTGTL SFLAWRAKWTCLNVSLDRDEIQPPSA*                            |
| Glyma.<br>13G339<br>800.1.<br>Wm82.<br>a2.v1 | MQDIGAPSVSLQLCITSLNKLPLFVWFLKQHNSEFGVSDMAEKESIHSFGDWRR<br>IPICTFFQDARLVFKADSLGREILSIALPAAMALTADPIASLVDTAFIGQIGPVELA<br>AVGVSIALFNQVSRIAIFPLVSVTTSFVAEEDTLSGANPQTEEGRCLEAGQPTDTE<br>TKELLPQKVTTGGNVHNSDFVGESFNIAKEERKRRHIPSASSAIFIGGILGLIQAIFL<br>ISAAKPLLNFMGVTSDSPMLHPAKQYLKLRLSLGAPAVLLSLAMQGVFRGFKDT<br>KTPLYATVAGDVTNIALDPLFMFVFRLLGVSGAAIAHVISQYLISVILLWRLLQV<br>DLIPPSINHLQLDRFLKNGFLLLMRVIAVTFCVTLAASLAARQGPTSMAAFQVC<br>LQVWLAVSLLADGLAVAGQAILAGAFANKDFNRATATASRVLQMGLVLGLA<br>LAFILGTGLHFGAKIFTQDANVLHLIQIGIPFIAVTQPLNSLAFVFDGVNFGASDF<br>AYSAFSMVVVAILSIIISLLILSSAGGFIGIWVALTIYMGLRAFAGFLRIGTGSGPWE<br>FLRSS* |
|                                              | MGVVEIYKRKTLQSSANNFNCRGRRYILWAAALMLMEAIHFTTSQYQLQYHG<br>GFTRIPFLRKRNHISFGYGHHPHHHFLRHSPSLSSPFIALGSKPSSYTSQDHHSD<br>SASVDVKRELISLTLPALASQAIDPLAQLMETAYIGRLGTVELASAGVSISIFNIIS<br>KLFNIPLLSVATSFVAEDIAKSSSAADAKTQQLSSVSTALLLALALGFFEALALY<br>LGAGAFHLHIGVPTQNPTYVPAHFSLRAVGAPAVVLSLALQGIFRGFKDTKT<br>PVICLGIGNFSAVFLFPLLMYYFRLGVTGAAISTVISQYIGTMLMIWCLNKRAELL<br>PPKMGDQLQFGSYIKSGGFLGRTLAVLSTMTLGTSAARHGPPVAMAAHQICMQ<br>VWLAVSLLTDALAASGQALIASSVSRHEYKVVKVTSFVLRIGLVMGICLTAILG<br>ASFGSLATIFTQDSEVLQVVKTLALFVSASQPFNALAYIFDGLHYGVSDFRYA<br>AFSMMFVGAVSSAFLVFAPPLFGLQGVWLGLVLFMALRAAAGAVRLLSKNGPW<br>WFLHRDLQIAEVVS*     |
|                                              |                                                                                                                                                                                                                                                                                                                                                                                                                                                                                                                                                                                                                         |

|                                              |                                                                                                                                                                                                                                                                                                                                                                                                                                                                                                                                                                                                                         |
|----------------------------------------------|-------------------------------------------------------------------------------------------------------------------------------------------------------------------------------------------------------------------------------------------------------------------------------------------------------------------------------------------------------------------------------------------------------------------------------------------------------------------------------------------------------------------------------------------------------------------------------------------------------------------------|
| Glyma.<br>14G032<br>400.1.<br>Wm82.<br>a2.v1 | MSSLEHQPLLPRLDSDSHIQNLSSDAIEEFLEHRPIALRWWSKLIVWESRLLWLL<br>SGASIVVSIFNYMLSFVTLMFTGHLGSLELAGASVASVGIQGLAYGIMLGMASA<br>VQTVCGQAYGAKKHGAMSILQRAILHIGAAVILSFLYWFSGDFLKAIGQSDSI<br>AERGQVFARGIILQLYAF AISCPMQRFLQAQNIVNPLAYMSVGVFLVHILLSWL<br>VIYVLGYGLQGAALTSFSWWLLVLFNGLYIIFSPRCKETWAGFSVKAFKGIWPY<br>FKLTVASAVMLCLEVWYNQGLVLLSGLLSNPTISLDSISICMNYLNWDMQFML<br>GLSTAASVRVSNELGASHPRVAKFSVFVNGTSILISVVFCTIILIFRVLSKLFTSD<br>SDVIDAVSNLTPLLAISVFFNGIQPILSGVAIGSGWQALVAYVNLASYVVGLTV<br>GCVLGFKTSLGVAGIWWGMILGVLIQTVTLILTARTNWQAEVEKAVVRINKSA<br>ENDTLDQLVADT*                                                                |
| Glyma.<br>14G078<br>000.1.<br>Wm82.<br>a2.v1 | MDSPLLENIDNSTTYVEEKKTLNSVVKKFGFESKKLWKIAGPAILTSICQYSLGA<br>LTQTFAGLVGDLELAAVSVENS SVAGLAFGVMLGMGSALETLCGQAYGAGQS<br>TMLGVYMQRSWVILFVTALILLPLYIWSPPILRLFGQTAEISDAAGKFALWMIPQ<br>LFAYAINFPMVKFLQAQRKVLVMLWISVVVLVLHTFFSWFLIFKLGWGLIGAAI<br>TLNTSWWWVIVIAQLLYIFITKSDGAWNGFTWLA FSDLFGFVKLSLASAVMLCLE<br>FWYLMILVVITGRLKNPLVPVDAISICMNINGWDAMIAIGFNAAISVRVSNELG<br>AGDFKAAKFSVWVVSITSVFIVVAMIGVLSTKDYFPYLF TTSVPVANETTRLAA<br>LLGVTVLLNSLQPVLSGVAVGAGWQSLVACINIVCYVIGLPAGIILGFPLGLGA<br>EGIWSGMIAGIVLQTTILIVTSIRNWKKEAEEAESRVKKWGGAIAIDQ*                                                                                   |
| Glyma.<br>14G158<br>100.1.<br>Wm82.<br>a2.v1 | MLGVYMQRSWVIVNATAILLSLLYIFAGPMLRAIRQTEAISAAGGEFAVWMIPQ<br>LFAYAVNYP AQKFLQAQSRIMVMAWIAAAAALVLHTLFSWLLILEFWWGLVSA<br>VVVLNASWWFIDIGQLHTFSSIL*                                                                                                                                                                                                                                                                                                                                                                                                                                                                            |
| Glyma.<br>15G034<br>600.1.<br>Wm82.<br>a2.v1 | MPNIGAPSVSLQLCITSLNKLPLLWFLKQHSEFGFSNMAEKESMYSLGDWRRI<br>PICTFFKDARLVFKADSLGREILSIALPAAMALTADPIASLVDTAFIGQIGPVELA<br>AVGV SIALFNQVSRIAIFPLVSVTTSFVAEEDTLSENPHIEEGRCLETGPPKDAE<br>TKELLPHKVTGGNNHNSDFVGEFCFNIKEEHKRRHIPSASSAIFIGGILGLIQAIF<br>LISAAKPLLNFMGVTS DSPMLHPAKQYLKLRTLGA PAVLLSLAMQGVFRGFKD<br>TKTPLYATVAGDVTNIALDPLFMFVFR LGVSGAAIAHVISQYLISAILLWRLMEQ<br>VDLVPPSIKHLQLDRFLKNGFLLL MRVIAVTFCVTLAASLAARQGPTSMAAFQV<br>CLQVWLAVSLLADGLAVAGQAILAGAFANKDFDRATATASRVLQMGLVLGL<br>ALAFILGIGLHFGAKIFTQDANVLHLIQIGIPFVAVTQPLNSIAFVFDGVNFGASD<br>FAYSAFSMVVVAILSIICLLILSSAGGFIGIWVALTIYMGLRAFAGFLRIGTGS GPW<br>EFLRSS* |
| Glyma.<br>15G107<br>100.1.<br>Wm82.<br>a2.v1 | MMESQNQNLLRQPLINSTHHHHHSADSRLEEVLSDPTLPWSKRILSATWIELNL<br>LFPLAAPAILVYVFNNLMSNVTRAFAGHLGNLELAAANLGN SGIQLFAYGLML<br>GMGSAVETLCGQAYGANKYEMLG IYMQRAIIVLTITGIPLTVVYIFCKPILLLLGE<br>PPEVASVAAMFVYGLIPQIFAYAVNFPIQKFLQAQSVVAPSTYISAATLV LHVAL<br>SWVVVYKLGFGIMGSSLMLSLSWWIIVGAQFLYVVSASKFKDTWSGFSVEAFSG<br>LWDFVKLSAASAVMLCLETWYFQVLVLITGLLDNPQLSLDSISVCMAITGLTMH<br>IGIGFNAAASVRVSNELGA EHPKSAAFSVIVNMISFIIAVIEAVVVLALRRVVS Y<br>AFTDGETVANAVSDLCPYLAVTLILNGIQPVLSGVAVGCGWQAIVAYVNVGCY<br>YGIGIPLGCVLGFTFGLGVQGIWSGMIGGTMLQTLILLWITLRTDWNKEVNTAK                                                                           |

|                                              |                                                                                                                                                                                                                                                                                                                                                                                                                                                                                                                                                                                                                      |
|----------------------------------------------|----------------------------------------------------------------------------------------------------------------------------------------------------------------------------------------------------------------------------------------------------------------------------------------------------------------------------------------------------------------------------------------------------------------------------------------------------------------------------------------------------------------------------------------------------------------------------------------------------------------------|
|                                              | KRLNKGWYKKEPKIQS*                                                                                                                                                                                                                                                                                                                                                                                                                                                                                                                                                                                                    |
| Glyma.<br>15G150<br>300.1.<br>Wm82.<br>a2.v1 | MVAEEKSQKTYPPTAEVVDELKRMGDIGVPIAAMSLVGYIKNMVLVVCMGRL<br>GSLELAGGALAIGFTNITGFSVLSGLAMGMEPLCTQAFGSRNFSVSLTLQRTII<br>MLLVASLPISLLWLKLEPLMLWLHQNPEITKVASVYCFFSIPDLIANSLLHPIRIYL<br>RSKGTTWPLLWCTLLSILIHPIVAFLTFLHLGVPGIAMSAFVANFNNTLFFLLSY<br>MLYMRVSKGSLSMPLLISSRPLSSSPRQHQQDQTSKTTTTLTKGKMWGLIRFSI<br>QSCLGVCLEWWWYEFMTILAGYLHNPRVALATAGIVIQTTSMLMYTLPTALSAS<br>VSTRVGNELGAGQPERARLSTIVAIGMSLASSILGLLWTTIGRNRWGRVFTSDSE<br>VLELTMSVLPIIGVCELANCPTTSCGILRGSARPGVGAGINFYSFYLVGAPVAIV<br>MAFVWKLGLVGLCYGLLAAQIACAVSILVVVYNTDWERESLKAKSLVGIYKSS<br>CDDQHHGDQTVKCEEGVVFLEKE*                                                |
| Glyma.<br>15G274<br>600.1.<br>Wm82.<br>a2.v1 | MDENGSSSNAPKNKRNLPSVFFKCDARHVFKMDSIAKEILGIAFPSALAVAADP<br>IASLIDTAFIGHLGPVELAAAGVSIALFNQASRITIFPLVSITTSFVAEESTIEKINTE<br>KKLTDKTKSKEVMHDDHSLQDIEKGASKEKNETPTESSAVRGNTTCVPENVEM<br>DDCNTSICKSTTETSSSSNKS SVSKAGRKKRHIASASTALLFGTILGLLQATTLIFAA<br>KPLLAAMGLKPDSPMLNPAIKYLRRLSLGAPAVLLSLAMQGIFRGFKDTTTPLY<br>VILSGYALNVILDPVLIFYCKLGIGAAISHVLSQYLMALALMVILTRKVDLVPPS<br>IKDLQIFRFLKNGGLLLARVIAVTFCQTLAASLAARFGPIPMMAAFQTCLQVWLTS<br>SLLADGLAVAVQAILACSF AEKDYEVLVAAATRTLQMSFVLGVGLSFAVGVGL<br>YFGAGIFSKSVLVVHLIRIGLPFVAATQPINSLAFVFDGVNYGASDFAYSAYSLVT<br>VSLASVASLFLSKSKGFVGIWIALTIYMSLRMFAGVWRMGTGTGPWRFLRGRS<br>MS* |
| Glyma.<br>16G149<br>100.1.<br>Wm82.<br>a2.v1 | MEETLLLPKENKRVSSNSMSSSSCSGFVQEFKKFLLQVVSLMMAGRSSWRTLPC<br>RYCIGHFLCRLHDNNSFLLSLMGMAGALETQCGQSFGTEQFHKLGNVVFCAIL<br>FLILSSAPISILWIFMDKLLVLLGQDHAISLVAGNYCIWLIPTLFGYSRFGSLFSDSE<br>LDLSNACNLSCCFSAFYTYLLAALSIGISYWLSVMLLIVYTQCFKKHQRFVLLSH<br>PICTYDLLSGGRSLELLVIFAGLLPNPKLETSLVLSIWCVSP*                                                                                                                                                                                                                                                                                                                              |
| Glyma.<br>16G157<br>300.1.<br>Wm82.<br>a2.v1 | MGDNKDHDFFSHKFPTTSQVMEEMKELWGMALPITAMNMLVFVRVAVSVLFL<br>LGRLGSLELAGGALSIGFTNITGYSVLVGLAAGLEPVCSQAFGSKNWDLLSLSLQ<br>RMVLILLMAIVPISLLWLNLERIMLFMGQDSAITGMASLYCFYSLPDLTNTLLQ<br>PLRVFLRSQKVTKPMMYCSLVAVLFHVPLNYLLVVVMGLGVPGVAMASVMT<br>NLNMVVLMAGYVCVCRKREVVLKWRCGGGGVVCGLGQLMGFAVPSCLMIC<br>LEWWWYIEIVTVLAGYLPRPTLAVAATGILIQTTSMMYTVPMALAGCVSARVG<br>NELGAGKPYKAKLAATVALGCAFVIGFINVTWTVILGQRWAGLFTNDEPVKA<br>LVASVMPIMGLCELGNCPQTTGCCILRG TARPGIGAHINLGSFYFVGTPVAVGL<br>AFWFKVGFSGLWFGLLSAQVACAVSILYVVLVRTDWEAEALKA EKLTRIEMGS<br>CNGLRNKENERDEESKGLLVNGNGNKNKDDTC*                                                    |
| Glyma.<br>16G180<br>000.1.<br>Wm82.<br>a2.v1 | METPLVIQKHTSEPDYLPVESLKDVMFVLR TETVKIWRVALPMALLALFQLLMD<br>SSTSIYAGHIGDIELSSIGVYQGVIGAIYFYLLFGMSSALATLCGQAFGAGKIQSTC<br>IYVQRSWIILTATCIILLPIYVYATPILKLLGQDEGIAEVAGRYSIQVIPYMF SFAVA<br>FPIQRFLQAQSKVKVIMCIAFVDLLIQNGLLYIFINVFGWGITGLAIVTNIVGWLY<br>AVALVVYTIGWCKEEWSGFCWMAFRDLWAFAKLSLASSVMNCLEQWYITCIM<br>LLAGLLDNPVIAVGSYSICFNVQGWDDMLRLGINTAISVRVSN TLGMSHPRAAI<br>YSFCVTMFQSLLL GILFMTVIFFSKDEF AKIFTDSEDMILAAADLAYLLGVTIVLN                                                                                                                                                                                     |

|                                              |                                                                                                                                                                                                                                                                                                                                                                                                                                                                                                                                                                                                                       |
|----------------------------------------------|-----------------------------------------------------------------------------------------------------------------------------------------------------------------------------------------------------------------------------------------------------------------------------------------------------------------------------------------------------------------------------------------------------------------------------------------------------------------------------------------------------------------------------------------------------------------------------------------------------------------------|
|                                              | SASQVMSGVAIGSGWQVMVGYINLACYIVGLPIGIFLGFKLHLGVKGLWGGT<br>MCGSILQTLVLFTIIWKTNWSKEVEQTAHRMRLYVEQ*                                                                                                                                                                                                                                                                                                                                                                                                                                                                                                                        |
| Glyma.<br>16G180<br>100.1.<br>Wm82.<br>a2.v1 | MYGWICVAKAEVCQPRCPGASTPYSLVLMDSSTSIYAGHIGDIELSSIAVYQAFR<br>IQRFLQAQSKVKVIMCIAFVDLLIQNGLLYIFINVFGWGITGLAMVTNIIGSLCAL<br>ALVVYTIGWCREEWGRFSQLQKRNLWAFKLSLASSVMNCLEQCFNVQGW<br>YMLLLGINTAISLKDVKFVLWTETVKIRRTLPAVALSQLFQFLTNSSTSIYVGRVG<br>DIELSSISVYQGVSSI*<br>METPLVIQKFTSESDYLPVKSLKDLKFVLWTETVKIWRIAAPMALSALLQFLT<br>TSIYAGHLGDIELSSISVYQGVISAIYFDLLFGMSSALVTLCGQAFGAGQIQSTCIY                                                                                                                                                                                                                                       |
| Glyma.<br>16G180<br>200.1.<br>Wm82.<br>a2.v1 | VQRSWIILTATCIILLPIYVCATPILKFIGQDHEIADLAGRYSIQVIPYMFSCAITFPF<br>QTFLQAQIKVKVITCIALAVLVIQNVLLYIFINVFGWGTTGLAMVTNITGWVYA<br>MALVVYTIGWCKEWTGFSWMAFRDLWSFAKLSLASSVMSCLEQWYGTCIILL<br>AGLLDNPVIDVGSYSICFNVQGWHTMLLLGISVAISIRVSNLTGMSPRAAIYSF<br>CVTMFQSLLLGIVFMIAIFLSKDEFKIFTDSEDMIRAVADLAYLLGVSMVINSAS<br>QVMSGVAVGSGWQVMVGYINLACYVVGLPIGIFLGFNQHLGVKGLWGGTM<br>CGRILQMLVLLIIWKTNWSKEVEQTAHRMRIWSINNLHSNDMGNVT*<br>MCHPTLDVTCNCQCCSTSPDCPISITNPLISKPQNTTTPPPPHQHNNTTTKTK<br>TPPPSTTATKTTTAPKPHHVPEAIKEVFSISKIVIPMILTGLLLYCRSMISMLFLGH<br>LGELALAGGSLAIGFANITGYSILSGLAVGMEPICGQAFGAKRFTLLGLCLQRTIL                         |
| Glyma.<br>16G198<br>700.1.<br>Wm82.<br>a2.v1 | LLLFTSLPISLLWLYMKQILLLCGQDVAIATQAQSYLVYSIPDLIAQSFLHPLRIYL<br>RTQSITLPLTLCASFILLSHIPINYFLVAHLKLGKGVALGGVLTNFNLVASLILYIV<br>FSGTHKKTWGGFSFECFTQWKSLLNLAIPSCVSVCLEWWWYEIMILLCGLLVNP<br>KATVASMGIQTTSLLYIFPSSLSFSVSTRVGNKLGAQKPSKARLSAIVGLSCSFM<br>SGVLALVFALMVRNTWASMFTKDKDIITLTSMVLPPIGLCELGNCPQTTGCGVL<br>RGTARPKVGANINLGC FYLVGMPVSIWLAFFTG YDFQGLWLGLLAAQGSCAV<br>TMLVVLCRTDWEFEAQRACKLTGMGGAASGVDQSREVDPEKPLKHESNEDSL<br>LLADSDENEQ*<br>MLAEQKFQKTYPTVTEVLEEVRMTDIGFPIAAMSLVGYLKNMTLVVCMGRLG<br>SLELAGGSLAIGLTNITGYSVLSGLAMGMEPLCTQAFGSRNLSLLSLTLQRTILM<br>LLLFSLPISLLWLNLESLMLCLRQNPDIRVATLYCRFAIPDLIANSFLHPLRIFLR |
| Glyma.<br>17G027<br>900.1.<br>Wm82.<br>a2.v1 | SKGTTWPLLWCTLILLSILLHPLTLTFLTFKLN LGVPGIAISSFVANFSNLFFLLLYMF<br>YTRVPKESLHVSLLMSHNNLIITCSSSTSTIAKEWGMLMKFSIQSCLAVCLEWW<br>WYELMTISAGYLDNPRVALATAGIVIQTTS LMYTLPTALSASVSTRVGNELGAG<br>QGERANLSTVVAIGLALVSSIFGLLWTTMGRERWGRVFTSDSEVLQLTVAVLPII<br>GLCELANCPQTTSCGILRGSARPGIGAVINFC SFYLVGAPVAIVLAFYWKLG MV<br>GLCYGLLAAQIACVVSIFGVYKTDWERESLKARCLVGKASCGTFAYDEDQTD<br>ALKCEEVVFLNSQK*<br>MLTTLIPKSPTCQLHQMQNPHNNINTTHLSLSLVEAKCIANISFSMILTGLLLYS                                                                                                                                                                        |
| Glyma.<br>17G131<br>700.1.<br>Wm82.<br>a2.v1 | RSVISMLFLGHLGELALAGGSLAIGFANITGYSVLSGLAMGMEPICGQAFGAKR<br>FKLLGLTMQRTVLLLLITSCLISLFFWLNMKKILLCAQE QDIANEAE LYFYSLP<br>DLVLQSL LHPLRIYLR SQSITLPLTCCA AVSILLHVPVNYLFVSILNLGIKGV ALSA<br>VITNLNLVVLLIYIVFSGTHKKTWPGISRECFNGWKLLNLAIPSCVSVCLEWW<br>WYEIMILLCGLLVNPHASVASMGVLIQTTAL IYIFPSSLSFGVSTRVGNELGAGN<br>PRRAKLAAIVGLCF SFVFGLSALAF AVSVRN VWASMFTLDGEI IALTTAVLP IIGL                                                                                                                                                                                                                                             |

---

|                                              |                                                                                                                                                                                                                                                                                                                                                                                                                                                                                                                                                                    |
|----------------------------------------------|--------------------------------------------------------------------------------------------------------------------------------------------------------------------------------------------------------------------------------------------------------------------------------------------------------------------------------------------------------------------------------------------------------------------------------------------------------------------------------------------------------------------------------------------------------------------|
|                                              | CELGNCPQTTVCGVLRGTARPKLGANINLGCFYLVGMPVAVWLGFAGFDFK<br>GLWLGMLAAQGSCIVTMMFVLARTNWEGQALRAKELTSSDPREEKKLVEEEH<br>EEKGFLGSCATKEASDLVV*                                                                                                                                                                                                                                                                                                                                                                                                                                |
| Glyma.<br>17G136<br>400.1.<br>Wm82.<br>a2.v1 | MSATSKGESITANDWSNRQPSFSSHTQKCPSNANNFVKMVVEELRVQRGIAL<br>PLVPMNLAWFAKLAITTAFLGHLGELNLAGGALGFSFANVTGFSVLNGLSGA<br>MEPICGQAHGAKNARLLHKLTLLMTLLLLLVTPLSFLWLNLGKILILFGQQQE<br>ISTVAKTYVSNLIPDLFIKALLCPLKAYLSSHCVTLPTMFSSAVALAFHIPVNIVLS<br>KTMGLRGVAIAVWITDLMVMVMLAIYVVVLERRSEGLLWKEGGWWDQNNM<br>DWIRLIKLSGSCCLNTCLEWWCYEILLFLTGHLANAKQANFDYLHYAVMISLA<br>TSVSTRVSNELGANRAGQACESARVSLALS SVSGCIGGSTMVAARGVWGD LFS<br>HDKGVVKG VKKAMLLMALVEVFNFPVTVC GGIVRGTGRPRLGMYASLG GFYF<br>LTLPLGVVFAFKLRLGLAGFTIGLLIGIVACLILLTFIVRINWVQEATKAQTFVCI<br>AQVQEQVPRYEVNELVENHENDQV*   |
| Glyma.<br>17G136<br>500.1.<br>Wm82.<br>a2.v1 | MSATSKQVENLSTNDKANHRPSSPSHTKKCPFNANFIKMOVLEELRVQRGIALP<br>LVAMNLAWFAKTAITTAFLGHLGELNLAGGALGFSFANITGFSVLNGLSGAME<br>PICGQAHGAKNVRLHKTLLMTTLLLLLASLPISFMWLNVDKILICFGQQQEIST<br>VAKTYVSYLIPDLLVTSLLCPLKTYLSSQCMTLPTMFSSAVALAFHIPVNIVLSKT<br>MGLRGVSI VAVWITDLMVMVMLAVYVVVLERRNEGMLWKEGGWWDQNVMD<br>WIRLMKLSGSCCLNTCLEWWCYEILVLLTGHLANAKQALGVLAIVLNFYDYL<br>SVMLSLATCVSTRVSNELGANSAGQAYKSARVSLAVGVISGCIGGSMMVASRG<br>VWGNLFSHDKGVVKG VKKTMFLMALVEVFNFPVTVC GGIVRGTARPWL GMY<br>ANIGGFYFLALPLGVVFAFKLRLGLAGLIIGFLIGVVACLILLTFIVRINWVQEA<br>TKAQMLVCIPAQVQEQVPRNQVNELVR* |
| Glyma.<br>17G175<br>100.1.<br>Wm82.<br>a2.v1 | MGLITYGKSAISTYFLGKLSKEALVGGSLAIGVANITGYSIISSLATSMDGISSQAC<br>GAQQWTLIGQTLQCSIMILTLTCITISILWLNIEPVLLFCGQNPTISSIATTYLGFSL<br>PDLIFTSLIISFKIFLRTQDVTLPFMFSATLAPFLHAIINNVVIHTFGLGIQGV ALVG<br>SFTNIKFLIILLLYLWFSRNCNSNSWQGWYELLVLFSGVLPNATKTIATYGIIIQA<br>TSLIYNFPYALSLAVSPKVGNELGANRSDKAKASSFYALLCAFITTIVATILTVNG<br>SARPTLGAKINLVSFYVVG L PVAL LMSFVFDLGLLGLLLGLLLAQIVRASVMTIV<br>LARTNWGASTEGKGV*                                                                                                                                                                   |
| Glyma.<br>17G247<br>400.1.<br>Wm82.<br>a2.v1 | MDSPLLENIDNSCSNVEEEKTPNTVVKRFGFESKKLWKIAGPAIVTSICQYSLGA<br>LTQTFAGLVGDLDLA AVSVENSVIAGLAFGVMLGMGSALETLCGQAYGAGQI<br>RMLGVYMQRSWVILFITALILLPLYIWSPILRLAGQTAEISDAAGKFAVWMIPQ<br>LFAYAINFPIVKFLQAQRKVLVMLWISVVVLVLHTFFSWLVIFKLGWGLIGAAV<br>TLNTSWWWVIVIAQLLYIFITKSDGAWSGFTWLAFSDLFGFVKLSLASAVMLCLEF<br>WYLMILVVITGRLENPLIPVDAISICMNINGWDAMIAIGFNAAISVRVSNELGAG<br>DFKAAKFSVWVVSITSV SIGVVVMIGVLLTKDYFPYLFTTSVPVANETTRLSALL<br>AVTVLLNSLQPVLSGVAVGAGWQSLVAYINIVCYLVGLPAGIILGFKLGLGAE<br>GIWSGMIAGIVLQTTILIIVTSIRNWKKEAEEAESRVRKWGG AISYDQ*                             |
| Glyma.<br>18G097<br>600.1.<br>Wm82.<br>a2.v1 | MIVIFLSKDEFKIFTNSED MIRAVADLAYLLGVSIMSGVAVGSGWQVMVGNIN<br>LACVYVVGLPIGIFLGFNQHLGVKGL*                                                                                                                                                                                                                                                                                                                                                                                                                                                                              |

---

|        |                                                                                                                                                                                                                                                                                                                                                                                                                                                                                                                                                                                                                                                                                                                                                                                                                                                                                                                                                                                                                                                                                                                                                                                                                                                                                                                                                                                                                                                                                                                                                                                                                                                                                                                                                                                                                                                                                                                                                                                                                                                                                                                                                                                                                                                                                         |
|--------|-----------------------------------------------------------------------------------------------------------------------------------------------------------------------------------------------------------------------------------------------------------------------------------------------------------------------------------------------------------------------------------------------------------------------------------------------------------------------------------------------------------------------------------------------------------------------------------------------------------------------------------------------------------------------------------------------------------------------------------------------------------------------------------------------------------------------------------------------------------------------------------------------------------------------------------------------------------------------------------------------------------------------------------------------------------------------------------------------------------------------------------------------------------------------------------------------------------------------------------------------------------------------------------------------------------------------------------------------------------------------------------------------------------------------------------------------------------------------------------------------------------------------------------------------------------------------------------------------------------------------------------------------------------------------------------------------------------------------------------------------------------------------------------------------------------------------------------------------------------------------------------------------------------------------------------------------------------------------------------------------------------------------------------------------------------------------------------------------------------------------------------------------------------------------------------------------------------------------------------------------------------------------------------------|
| Glyma. |                                                                                                                                                                                                                                                                                                                                                                                                                                                                                                                                                                                                                                                                                                                                                                                                                                                                                                                                                                                                                                                                                                                                                                                                                                                                                                                                                                                                                                                                                                                                                                                                                                                                                                                                                                                                                                                                                                                                                                                                                                                                                                                                                                                                                                                                                         |
| 18G110 | MDKLLVLLGQDHAISLVAGNYCIWLIPALFGYVVLQALVRYFQTQSLIFPMLVT                                                                                                                                                                                                                                                                                                                                                                                                                                                                                                                                                                                                                                                                                                                                                                                                                                                                                                                                                                                                                                                                                                                                                                                                                                                                                                                                                                                                                                                                                                                                                                                                                                                                                                                                                                                                                                                                                                                                                                                                                                                                                                                                                                                                                                  |
| 800.1. | SVVVLVLHIPICWVLVFELGLGQNEAALSIGISYWLSVMMLIVYTVLSVMSENLG                                                                                                                                                                                                                                                                                                                                                                                                                                                                                                                                                                                                                                                                                                                                                                                                                                                                                                                                                                                                                                                                                                                                                                                                                                                                                                                                                                                                                                                                                                                                                                                                                                                                                                                                                                                                                                                                                                                                                                                                                                                                                                                                                                                                                                 |
| Wm82.  | SFR*                                                                                                                                                                                                                                                                                                                                                                                                                                                                                                                                                                                                                                                                                                                                                                                                                                                                                                                                                                                                                                                                                                                                                                                                                                                                                                                                                                                                                                                                                                                                                                                                                                                                                                                                                                                                                                                                                                                                                                                                                                                                                                                                                                                                                                                                                    |
| a2.v1  | MEDHEDHHTHPLLTPRHHTPDPAVVFTAKSDDIAPAGAGDFAREFFAESKKLW<br>YLAGPAIFTSVCQYSLGAVTQVFSGHVSTLALAAISIENSVIAGFCLGITFGMGSA<br>LETLCGQAYGAGQVHMLGVYMQRSWVILNATAILLTLLYIFAAPLLRAIGQTE<br>AISAAAGDFAVWMIPQLFAYAVNYPQKFLQAQSRIMVMAWIAAAALVLHT<br>VFSWLLMLKLRWGLVGAAVVLNASWWFIDLAQLVYIMGGACGEAWSGFTFK<br>AFHNLWGFVRLSLASAVMLCLEVWYFMALILFAGYLNKNAEVSVDALSICMNIL<br>GWTIMVSFGMNAAVSVRVSNELGACHPRTAKFSLLVAVITSTLIGVMLSMVLIIF<br>RNQYPFLFSNDSEVRKIVVELTPMLALCIVINNVQPVLSGVAVGAGWQAVVAY<br>VNIACYFFGIPLGLILGYKLDKGMGIWSGMLLGTILQTCVLFMVYRTDWNK<br>EASLAEDRIKQWGGHEDSKTHAIAKNDQET*<br>MVSSLSTFFLCTHSLKSPTLKLPTKFYCFARLFRVPPKASSRNKNANTDSVETPS<br>LQPSSLKPPYDSSSSLLRCFSGVLKFVYWVLASDGWLTDFDESIVVLIALPAALALA<br>ADPIASLIDTAFVGHIGAVELAAVGVVSASGFNLVSKAFNVPLLNVITASFVAEEQ<br>ALIRKEEESIPSDKNDPFQMYIQIKLLPSVSTSLALAAATLGMAETVVLTGSGIL<br>MNIMGIPADSPMRGPAEQFLTLRAFGTPAIVLALAAQGTFRGFLDTKTPLYAVG<br>KVHNLKFEITNKYLLTEMFLGVGNFLKAILDPILIFLGLGGATVATLISEYLIAFI<br>LLWKLSDKVLLIPSEFYGRKFFSYLKSETLLFDSNWILLCLEPAIPAEVFKDIPNIP<br>PPPIPKMFLTLAVFITVMLSTSVAAQQGPIPPMAGHQICMQVWLSALLACNYSL<br>GNYEQASLVIFRVMQIGLGAGITLSMILFFGFGAFSSLFSTDSEVLVDVARSGIWV<br>AGSQPVNALAFVIDGIYYGVSDFGYAAYSMVISYHVGLVSSTFLLVAPVGLPG<br>VWTGLFIFMALRVLAGLWMLSSKSGPWDTFWYKDGAED*<br>MRSTKGGDGEGKRNCGCCGRFIEGLHQHLHQFLKALFPTLSLSEVKEELKSLA<br>NIACPMMMTNVLLYSRSAISMLFLGRQGKVELAGGSLAIGFANITANSFLKGLT<br>MGMDPICCQAYGAKRWSVLSQTFCKTLCLLLLVAIPISLLWLNMAPLLHWLGQ<br>DPEVTKVAQVYMFVSIPELLAQVHLNPLRSFLRTQGLTTPLTIAASF AAILHLPIN<br>YFLATYLELGVKGIALATGLNSINMILGLVLYLLVSKKPLKPWEGATILSSFHDW<br>RPLLTLALPSCISVCLEWWCYEIMFLCGLLSNPQTTVATMGVLIQTTGFLYVFP<br>FSLSAALTTQIGHSLGAGQPSRAQITATIGLFIAFALGFSAFVLLIVRNVWGKLF<br>TNETQIVDMVTTILPILGLCEIGNWPQTAACGILSGTARPYVGARINLCAFYLIG<br>LPVAVFAAFMHRYQLRGLWFGMLAAQISCFMCMVYTLVQTDWGHQSRRAEQ<br>LAQATDEEISGFLDSDM*<br>MFNNGFNSMETTELHHAPEGLVDTNNGGDYTEMMSGFADFKNVFSVESIKLWTIA<br>APIAFSILCNYAVNSFTTIFVGHGLDLELSSVLSLSVVSNSFSFGFLGMASALETL<br>CGQAFGAGQVEMIGVYMQRSWLILLGACICLTPIYIYAEPILLLLQGEPEIAELA<br>GAFTIQSIPQMFSLAINFPTQKFLQAQTKVGFLAWLGFGAFIFHVILLWILLKVFS<br>LGTGAAVAYCTTAWIIALAQTAAYVIGWCKDGWRGFSWLAFKDLWAFVKLSV<br>ASAVMLCLEIWYFMILIVLTGHLDNAVIAVGSLSICMTINGFEGMLFIGINAAISV<br>RVSNELGSGRPRAAKYSVIVTHIESLIIGLISAAIILATKDHFAIIFTESKEMIKAVSK<br>LAGLLGITMILNSVQPVISGVAVGGGWQALVAYINLFCYYIMGLPLGFLGKYKL |

|                                              |                                                                                                                                                                                                                                                                                                                                                                                                                                                                                                                                                                |
|----------------------------------------------|----------------------------------------------------------------------------------------------------------------------------------------------------------------------------------------------------------------------------------------------------------------------------------------------------------------------------------------------------------------------------------------------------------------------------------------------------------------------------------------------------------------------------------------------------------------|
|                                              | GYRVEGIWVGMICGTMLQTLILLYIVYKTNWNKEVEQASERM RKWTGQEIEIN<br>LANSQQTFTR*                                                                                                                                                                                                                                                                                                                                                                                                                                                                                          |
|                                              | MEEGSETGKWGW MKRRRAMREELKKVGTIAAPMVVASVLQYLLQVVSLVMV<br>GHLNQLSLSSVAIAISLTNVS GFSVLSGMAGGLETLCGQAFGAGQYEKFGQYTY                                                                                                                                                                                                                                                                                                                                                                                                                                                |
| Glyma.<br>18G293<br>100.1.<br>Wm82.<br>a2.v1 | TAVISLSLICFPITILWTFMDKILTLLGQDPTISLEARKYAIWLIPALFGSAILKPLTR<br>FFQTQSLISPMIL TSAIALCFHGATCWTLVFKLELGHVGA AISFSLCVWFNVMLL<br>LSFVRYSSACEKTRIPFSKNALVGVGVFFRF AVPAAVMVCLKWWACEILVLLAG<br>LFPNPKLET SVLSICLTISTLHFTIPYGF GAASTRVSNELGAGNPQAVRVAVSAT<br>MFLAVTEGLIVSATLFGCRHLLGYAYSDDRMVVHYVAVMTPLLCLSIFTDSLQG<br>VLSGVARGSGWQH LGAYVNLGAFYLVGIPVGIVLGFVAHLRAKGLWIGIVT GSI<br>VQSILLSLVTALT NWKKQAMMARERIFDAKPPDENESNHMTSA*                                                                                                                                        |
| Glyma.<br>18G293<br>200.1.<br>Wm82.<br>a2.v1 | MAAPMLAANMCQYLLQVVSLMMVGH LGLLVSFSGVAIAISFAEVTGFCVLMG<br>MAGALETLCGQTYGAE EFTEIGNYTFCAIVTLLLVCLPISLLWIFMDKILL LFGQ<br>DPEISHVAHKYCIC SIPALYGFAVLQCQIRYFQTQSMIFPMVFSSIAVLCLHVPIC<br>WGLVFKLGLGHVGAAYAIGISYWLNVIGLGIYMNYS PACEKTKIVFSFNALLSIP<br>EFCQFAIPSGLMFCFEMWSFELLTLFAGLLPNPQLQTSVLSVCLNTTTLHYIIPYA<br>VGASASTRISNELGAGNP KAAQDIVPILCGSFTADSLIGALSGIARGGGFQQIGA<br>YVNLGAYYLVGVPLAFL LGFVLHFNAKGLWMGSLTGSVLQV IILT TVVTVLTDW<br>QKEATKARERIVEKSIKVHND SVI*                                                                                                 |
| Glyma.<br>18G293<br>300.1.<br>Wm82.<br>a2.v1 | MEETLLLPKENKRVSSNSKSSSSSGSFVQEFKKVSLMAAPMVVSVSQFLLQVV<br>SLMMAGIALATSFADVTGFNILMG MAGALETQCAQSFQTEQFHKLGN YVFCAI<br>LFLILSSAPKSILWIFMDKLLVLLGQDH AISLVAGNYCIWLIPALFGYAVLQALV<br>RYFQTQSLIFPMLVTSVVVLVLHIPICWVLVFELGLGQNEAALSIGISYWLSVMLL<br>IVYTLSGGRSLELLVILAGLLPNPKLET SVLSICLKICNLHYFIPYGTGA AVSSRV<br>NELGAGRPQAAREAVFAVIVLTFTDAIVFSSV LFCFRHVLGF AFSNEMEVVHSV<br>AKIVPVLCLSFSVDGFLGVLCG SRLQKMG AISNLVAYYAVGIPVSLVFGFGLNFY<br>GKGL*                                                                                                                       |
| Glyma.<br>19G001<br>600.1.<br>Wm82.<br>a2.v1 | MESSREM NKELAAPLLVPRKSGDGQENNNNNGVEVVASSSESTFCQELKRVSS<br>MAAPMVAVTVSQYLLQVVSLMMVGHFGILVSFSGVAIATSFAEVTGFSVLLGM<br>SGALETLCGQTYGAE EYRKFGNYTWCAIVTTLVCLPISLVWIFTDKILL LFSQDP<br>EISHAAREYCIYLIPALFGH AVLQALTRYFQTQSMIFPMVFSSIT ALCLHVPICWG<br>LVFKLGLGHVGAALAIGVSYWLN VVWLAIYMIYSPACQKTKIVFSSNALLSIPEF<br>LKLAIPSGLMFCFEWWSFEVLTLLAGILPNPQLETAVLSICLNTTTLHYFIPYAVG<br>ASASTRVSNELGAGNPKTAKGAVRVV VILGVAEAAIVSTVFISCRHVLGYAYSN<br>DKEVIDYVAEMAPLLCVSVTADSLIGALSGIARGGGFQEIGAYVNLGAYYLVGI<br>PMGLLLGFHLQLRAKGLWMGTLSGSLTQV IILAIVTALIDWQKEATKARERVVE<br>NSIKAHI* |
| Glyma.<br>19G120<br>200.1.<br>Wm82.<br>a2.v1 | MEMEEELKETLMHHPNNTSLESVEKEESLRKRAW EESKMMWV VAGPAIFTRFS<br>TFGIMVVSQSFIGHIGSTELAAYAIVMTVLVRFANGVLIGMASALDTLCGQAYG<br>AKKYDMLGVYLQRSWIVLFMTSILL LPIYIFTTPLL EALGQDKTIAQVAGSISLWS<br>IGIIFAFSVSFTSQMFLQSQSKNKIIAYLAAVSISIHVLLSWVLTVQFKFGLNGAMT<br>STLLAYWIPNIGQLVFIMTKCPDTWKGF SFLAFKDLLPVIKLSLSSGAMLCLEIW<br>YNTVLILLTG NMKNAEVSIDALAICLNISGWEMMIALGFFAAASVRVANELGR<br>GNSKATKFSILITVLTFSIGFVFLVFLFLRGKLA YIFTPDPEVAKAVGDLSPLLSF                                                                                                                                |

|                                              |                                                                                                                                                                                                                                                                                                                                                                                                                                                                                                                                                        |
|----------------------------------------------|--------------------------------------------------------------------------------------------------------------------------------------------------------------------------------------------------------------------------------------------------------------------------------------------------------------------------------------------------------------------------------------------------------------------------------------------------------------------------------------------------------------------------------------------------------|
|                                              | SFLNSVQPVLSGVSVGAGWQSVVAYVNIGCYYLIGIPVGVLLDNLFHLEVKGI<br>WIGMLFGTFVQTVMLTITFTKTDWDKQVEIARNRVNKWAVTTENEESSNRSSIS<br>S*                                                                                                                                                                                                                                                                                                                                                                                                                                  |
| Glyma.<br>19G120<br>300.1.<br>Wm82.<br>a2.v1 | MEGHLKQKLLRNKERRTSSEQEEEEELSLVKRVWNESQVMWIVAAPAIFTRFSTF<br>GISVISQAFVGHIGSKELAAAYALVFTVLVRFANGVLLGMASALSTLCGQAYGAK<br>EYGMMGVYLQRSWIVLFLTAVCLLPVFIFTSPILMLLGQDESIAQVAGNIALWSI<br>PVMFASIVSFTCQTFQLSQSKNVIIAFLAAFSIVIHVFLSWLLTMKFQFGIPGAMIS<br>AGLAYWIPNIGQLIFVTCGWCSDTWEGFSFLAFKDLWPVVKMSLSAGAMLCLE<br>LWYNTILVLLTGNMKNAEVEIDALSICLNINGWEMMISLGFMAAASVRVANEL<br>GRGSAKAAKFSIIVSVLTSLAIGFLLFLFFLFFRERLAYIFTSNKDVAFAVGDLSP<br>LSVSILLNSVQPVLSGVAIGAGWQSIVAYVNMGCYYAIGIPVGIVLGNVLDLQV<br>KGIWIGMLFGTLIQTIVLIVITYKTNWDEQVTIAQKRISRWSKVDNADQENEAQ<br>RKYVS* |
| Glyma.<br>19G120<br>700.1.<br>Wm82.<br>a2.v1 | MSSALSTLCGQAYGAKEYAMMGVYLQRSWIVMSLTTLFLLPVFIFTRPILMLLG<br>QDEIIAEVAGTISLWSIPIIFAFIASFTCQNFLQSQRNTIIALLAAFSIVIHVFLSWL<br>LTIQFKLEIPGAMTSTSLAFWIPNIGQLIFITCGWCSDTWKGFSFLAFKDLWPVV<br>KLSLSSGVMLCLELWYNTILVLLTGNMENAQIDALSICLNINGWEMMISLGF<br>MAAASVRVANELGKGSSKAAKFSIVVTVLTSLAIGFVLFLFFLFLREKLAYIFTTN<br>KDVAQAVGDLSPLLAISILLNSVQPVLSGVAIGAGWQSIVAYVNIGCYYYIGVPV<br>GVLLGNVLNLQVKGIWIGMLFGTFILTVVLIVITYKTDWDKQVIIARNRINKWS<br>KVESDHEIITSDN*                                                                                                             |
| Glyma.<br>19G120<br>900.1.<br>Wm82.<br>a2.v1 | MEGNLEKKLLSREKKSEEEEEEEKLSLVKRVWEESKVMWIVAAPAIFTRFTHFGI<br>SVISQAFIGHIGSRELAAYALVFTVIIRFANGILLGMASALSTLCGQAYGAKEYD<br>MMGVYLQRSWIVLFLTAICLLPLLIFTSPILTILGQDESIGQVAGTISLWSIPIIFAYI<br>VSNNCQTFQLSQSKNVIIISFLAALSIIHVLSWLFTMQFKYGIPGAMISTILAYWI<br>PNIGQLIFITCGWCPETWKGFSVLAFKDLWPVAKLSISSGAMLCLEFWYSTILILL<br>TGNMKNAEVQIDALSICININGWEMMIAFGFMAAASVRVANELGRGSSKAAK<br>FSIVVTVLTFSVIGFILFLFLREKVAYLFTSNEDVATAVGDLSPLLAVSLLLSI<br>QPVLSGVAVGAGWQSTVAYVNIGCYYLIGIPVGIVLGNIIHLQVKGIWIGMLFG<br>TLIQTIVLTIITYKTNWDEQVIIARSINKWSKVESDHETTTSDN*                 |
| Glyma.<br>19G244<br>000.1.<br>Wm82.<br>a2.v1 | MEQVDLVPPSIKHLQLDRFLKNASLATRQGPTSRAAFQFIASKITCWFHAILAG<br>AFANKDFDRATTTASRVLQICLILGLALAFILGIGLHFGAKIFTQDANVLQICLIL<br>GLALAFILGIGLHFGAKIFTQDANVLQICLILGLTLTFILGIGLHFGAKIFTQDAN<br>VLHLIQIGITFVVVTQPLNSLAFVFYGVNFGASDFAYSASFMSVRLLYGNSQVV<br>VAILSIIICLLILSSAGGFIGIWVALTITYMGLRAFASFLRIGMGSGPWFLRSS*<br>MWIPHYFSSFLRKEEQPNGGRKMNLTFVSSPFFPSFLAGTKEREA EYVMRWSV<br>FGEEMKRVGYLAGPMINVTLSQYFLQIISMMMVGHLGKLVLSSTAIAISLCAVS                                                                                                                                |
| Glyma.<br>20G123<br>300.1.<br>Wm82.<br>a2.v1 | GFSLIFGMSCALETQCGQAYGAQQYRKFGVQIYTAIVSLTLACLPLTLLWVYLG<br>KILIFLGQDPLISQEAGKFALCMIPALFAYATLQALVRYFLMQSLTSPLFISSSITLC<br>FHVAFCWLLVFKCGFNLGAAFSIGTSYWLNVVLLGLYMKFSTECEKTRVPISM<br>ELFHGIGEFFRCAIPSAAGMICLEWWSFELLTLLSGLLPNPELETSVLSICLSVTTTIY<br>TIPEAIGSAASTRVSNALGAGSPQSAQLSVSAAMTLAASAAILVSSIIFACRQVVG<br>YVFSELVDVVDYFTDMVPLLCLSVILDTLHGTLSGIARGCGWQHGLGAYVNLGA<br>YYVVGPIAAMLGFVWQLRGKGLWIGILTGAFCQTVMLSLITSCTNWEKQAIKA                                                                                                                            |



|                                              |                                                                                                                                                                                                                                                                                                                                                                                                                                                                                                                                                                                                         |
|----------------------------------------------|---------------------------------------------------------------------------------------------------------------------------------------------------------------------------------------------------------------------------------------------------------------------------------------------------------------------------------------------------------------------------------------------------------------------------------------------------------------------------------------------------------------------------------------------------------------------------------------------------------|
|                                              | RERTFQRSFAVEDGLVLANGENSLNLSACLVGIGKSSNFGGTKDQNLELEEGKV<br>LITRQV*                                                                                                                                                                                                                                                                                                                                                                                                                                                                                                                                       |
| Glyma.<br>20G123<br>400.1.<br>Wm82.<br>a2.v1 | MENSLLDKDEPENPSASAITWTVFSQEMKRVGYLAAPMITVTLSQYFLQIISM<br>MMVGHGLKLALSSTAIAISLCAVSGFSLIFGMSCALETQCGQAYGAQQYRKFG<br>VQIYTAIVSLTLACLPLTLFWVYLEKILIFLGQDPSISQEAGKFALCMIPALFAYAT<br>LQALIRFFLMQSLISPLVISSITLCFHVAFSWLMVFKSGFGNLGAAFSIGTSYWL<br>NVILLGLYMKFSTECERTRVPISMELFHGIGEFFTYAIPSAAGMVCLEWWSFELLTL<br>LSGLLPNPELETSVLSICLSIITTIYTIPEAIGSAASTRVSNALGAGSPQSARVSVSA<br>AMTLAVSEAILVSSIIFASRQVLGYVFSNEQDVVDYVTDMPVLLSISVIVDTLHGT<br>LSGIARGCGWQHIGAYVNL*                                                                                                                                                   |
| Glyma.<br>20G123<br>500.1.<br>Wm82.<br>a2.v1 | MEESLVKKHEEDRVVRWGVYSEEMRRICEIAGPMVAVVSSQYLLQVVSTMIVG<br>HLGELYLSSAALAIISLGVTFGSLHMGMASGLETICGQAYGAQQYQRIGMQTY<br>TAIFSLILVSIPVSILWINMESILVFIGQDPLISHEAGKFTIWLVPALFAYAILQPLV<br>RYFQVQSLLLPMFASSCVTLIIHVPLCWALVFKTRLSNVGGALAVSISIWSNVIFL<br>GLYMRYSACAKTRAPISMELFKGMWEFFRFAIPSAVMVCLEWWSYELLVLLSG<br>LLPNPQLETSVLSVCLNTISTLYMIPFGIGAAASTRVSNELGAGNSHAARVAVLA<br>AMSLAVIETSIVSATLFACRNVYGYIFSNEKEVIDYVTVMAPLVCISIILDSIQGVL<br>TGIARGCGWQHLGVFVNLGAFYLCGIPMAALLAFLVRLGGQGLWIGIQSGAFV<br>QTLLSIITGCINWEKQAIKARKRLFDDQFSADNILV*                                                                             |
| Glyma.<br>20G155<br>500.1.<br>Wm82.<br>a2.v1 | MCHITSHLPCKCNSNPEYVVSMPPEADMMITNPLIQKDITVTLTTLHEEKNDP<br>RTMQTHHHVLKELISICKIAFPMTGLLLYCRSMISMLFLGRLGELALAGGSLA<br>VGFANISGYSILSGLAVGMESICGQAYGAKKFSLLGLCLQRTILLLLFTCIPISLLW<br>LYMKHILLCGQDEAIATQAQSYLLYSIPDLLAQSFHLPLRIYLRQSITLPLTLCA<br>TFSILLHIPINYLLVSHLNWGIKGVALSQVWNTNLNLVASLILYVFSGTHKKTWG<br>GFSFECFTQWKSLLNLAIPSCISVCLEWWYEMILLCGLLVNPRATVASMGI<br>LQTTSLLYIFPSSISFSVSTRVGNKLGAQKPSKAKFSSIVGLSCSFMLGVFALVFTILV<br>RNIWANMFTQDKEIITLTSFVLPVIGLCELGNCPQTTGCGVLRGTAARPKVGANI<br>NLGCFYLVGMPVAVWLGFAGFDQGLWLGLLAAQGSCAVTMLVVLSTRTDW<br>DAEALRAKKLTSVVVDDSKEVGAEKPPKAEIKEDSLLSLADSDEDKQSWVSTF<br>W* |
| Glyma.<br>20G162<br>000.1.<br>Wm82.<br>a2.v1 | MDAPLLLNVNGEALVAENGDYVAVRELKEVKVFWIETKRVWEIAMPVFN<br>WCQFGVNSVTSMFVGHLDIQLSAISLINSVIGTFAGFMLGMGSATETLCGQA<br>FGAGQVNMLGVYMQRSWVILSVTSILLPIYIFAAPILKLLGQQEDIADLAGSFSI<br>LVIPQFLSLPFNFPTQKFLQAQSKVKVIAWIGLVALILHIGMLWFLIYVLDGFLA<br>GAALAFDITSWGITVAQLVYVVIWCKDGWNGLSWLAFKDIWAFVRLSLASAV<br>MLCLEVWYMMSVIVLAGHLDNAVIAVDSLICMNINGWEAMLFIVNAAVSV<br>RVSNELGLGHPRAAKYSVYVIVFQSLFLGIFFMAILATRDYYAIIFTNSEVLHKA<br>VAKLGYLLSVTMVLNSVQPVVSGVAIGGGWQALVAYINIGCYLFLGLPLGFVL<br>GYTANLGVGLWGGMICGIVLQTLILLILYKTNWKKEVEQTAERMRIWSGQD<br>IGVDKIVASA*                                                                 |
| OsMA<br>TE1                                  | MGSSDSQAPLLLPRGSHRKEEEEEYAAAGKVRGCCGGDGEggWWREATAEA<br>GRLASLAAPMIAVALLQLMMQLISTVMVGHLEVALAGAAIANSLTNVSGFSV<br>LMGLACGLETICGQAYGAEQYHKLALYMRSIIVLLVVSVPAAIHWVFIPEVLPLI<br>GQQPEIASEVGKYALWLIPGLFAFTVAQCLSKFLQTQSLIFPMVLSSSITLALFIPL                                                                                                                                                                                                                                                                                                                                                                     |

---

|              |                                                                                                                                                                                                                                                                                                                                                                                                                                                                                                                                                                                                                                                                                                                                                                                                                                                                                                                                                                                                                                                                                                                                                                                                                                                                                                                                                                                                                                                                                                                                                                                                                                                                                                                                                                                                                                                                                                                                                                                                                                                                                                                                                                                                                                                                                                                                                                                                                                                                                                                                                                                                             |
|--------------|-------------------------------------------------------------------------------------------------------------------------------------------------------------------------------------------------------------------------------------------------------------------------------------------------------------------------------------------------------------------------------------------------------------------------------------------------------------------------------------------------------------------------------------------------------------------------------------------------------------------------------------------------------------------------------------------------------------------------------------------------------------------------------------------------------------------------------------------------------------------------------------------------------------------------------------------------------------------------------------------------------------------------------------------------------------------------------------------------------------------------------------------------------------------------------------------------------------------------------------------------------------------------------------------------------------------------------------------------------------------------------------------------------------------------------------------------------------------------------------------------------------------------------------------------------------------------------------------------------------------------------------------------------------------------------------------------------------------------------------------------------------------------------------------------------------------------------------------------------------------------------------------------------------------------------------------------------------------------------------------------------------------------------------------------------------------------------------------------------------------------------------------------------------------------------------------------------------------------------------------------------------------------------------------------------------------------------------------------------------------------------------------------------------------------------------------------------------------------------------------------------------------------------------------------------------------------------------------------------------|
|              | <p>CWFMVYKVGGMGNAGAALSVSICDWVEVTVLGLYIVLSPSCEKTRAPLTWEAFS<br/> GIGSFLRLAVPSALMICLEWWSYELLVLLSGILPNPALETSVLSICISTVVLVYNLP<br/> HGIGTAASVRVSNELGAGNPEGARLVVGVALSVILCSAVLVSVTLLALRHFIGIA<br/> FSNEEEVINYVTRMVPVLSISVITDSLQGVLSGVSRCGWQHLGAYVNLGAFYL<br/> VGVPVALFFGFAMHLGGMGFWMGMVAGGATQVTLLSIITAMTNWRKMAEK<br/> ARDRVFEERIPTQSV<br/> VRVSQVAGEAQAGRVSVPMMAVTGLVMYSRALISMLFLGRLGELALAGGSLAL<br/> GFANITGYSVLSGLALGMEPICGQAFGARRGKLLALALHRTVLLLLAVALPISLL<br/> WVTSTGYILKQLGQDEGVADAAQTFAAYASADLAVLAVLHPLRVYLRSQLNT<br/> LPITACSLFSVLLHGPINYL LVRLRMGVAGVALAVALTDLNLLLALLCFLAISC<br/> AHRDSWVGPTSDCLRGWPALLRLAVPTATAVCLEWWWYELMIVLSGLLANP<br/> RATVASMGI LIQATSLVYVFPSSLGQGASTRVSHQLGAGRPAGARRAAGAALSI<br/> GLVVGAAAATFMVSVRSHWGRMFTSDGEILRLTAVALPIAGLCELGNCPQTAG<br/> CGVLRGSARPASGARINLASFYLVGMPVGVALAFGARLGFAGLWLGLLAAQA<br/> ACAVWMARAVAATDWDVEVARAKELTKASTTSGGTNHQHECNNSNTNTA<br/> NAKANTKTTTSPAANNINAGGGGSSDNRGYVPISESGHNDGSDDLEKLEEG<br/> MVATSGGCCCGDALGVDTKAGDKQQCSNGGAGTAEGNAGQRRGSASSER<br/> APLISVGDDEEAGEENDGDGGGGGHV<br/> MAGGDQRGDSPPSSHELSGRLEGILADGEAPWARRACKAAALEVRLAPIAAPA<br/> IVVYVPNNVLSISTQIFCGHLGNLELAASSLGNNGIQIFAYGLMLGMGSAVETL<br/> CGQAYGVHKYDMLGVYMQRSTVLLMATGVPLAVIYAFSRPILVLLGESPEIASA<br/> AAVFVYGLVPQIFAYAANFPIQKFLQAQSIVAPSAYTSAATLVHLVVGWL VVY<br/> QLGMGLLGASLVLSL SWWVIVAAQFVYIAASKRCRRTWTGFSWMAFSGLPEFL<br/> KLSTASAVMLCLETWYFQILILLAGLLDDPQLALDSLTVCM TLAGWMMISIGF<br/> NAAASVRVGNELGAGHPRAAAFSVVVVTAVSFVITVVMMAVFLMFRDYISYIFT<br/> EGETVARAVSDLCPLAATLILNGIQPVLSGVAVGCGWQKIVAYINVGCYYFVG<br/> IPLGFLLGK FHLGAKGIWTGMLGGTCMQTLILFWITFRTDWNKEVEEAKKRL<br/> NQWEDKKQPLLAGTVDY<br/> MGTESDQYPAHLSSSATVAGHGDDGESPEIAGAARLYVVGLIPQIFAYAANFPI<br/> QKFLQAQSIVAPSAYISAATLAAHVALSWFAVYKLGLGLLGASLILSL SWWVIV<br/> LAQFAYIVVSDRCRLTWAGFSSKA FSGLPEFLQLSAASAVMLCLETWYFQVTVL<br/> IAGLLKDPEIALDSLAVCMSISGWVFMVSVGFNAAASVRVSNELGAGNPRAAA<br/> FSVKVVTSLSLIVAAIIAAIVMCLREYLSYVFTQGEEVARAVSSMTPLLAVTIVLN<br/> GIQPVL SGVAVGCGWQAFVAYVNIGCYYIIGVPFGCVLGFHFDLGAMGIYGGM<br/> IVGLFVQTLILVYVTFRTDWNREVGEAKKRLNKWGDI AKPLLANED<br/> MGSSVKDAGGGKEEQQQQLESPLLEAAVSSGGDGGGGHGVSGELESILGDET<br/> VPWARRMWAATGVEMRLMLRLAAPAVLVYMINYLMSMSTQIFSGHLGTLEL<br/> AAASLGNTGIQVFAYGLMLGMGSAVETLCGQAYGAHKYDMLGVYLQRSTVL<br/> LMATGVPLAVIYAFSRPILVLLGESPEIASAAAVFVYGLVPQIFAYAANFPIQKF<br/> MQAQSIMAPSAYISAATLAFHLVLSYL VVYQFGLGLLGASLMLSISWWVIVVAQ<br/> FIYIVTSRRCRLTWTGFSMLAFSGLPDFFKLSLASAVMLCLETWYFQILVLIAGLL<br/> KDPEMALASLSVCMTISGWVFMISVGFNAAASVRVSNELGAGNPKSAAFSVVV<br/> VTVLSFFLSVVISLVILLCRDYISYIFTDGEDVATAVSKLTPLLALTILNGIQPVLS<br/> GVAVGCGWQAFVAYVNVGCYYIVGIPLGCLLGFYFDLGAAGIWSGMIGG TLM</p> |
| OsMA<br>TE10 | <p>RATVASMGI LIQATSLVYVFPSSLGQGASTRVSHQLGAGRPAGARRAAGAALSI<br/> GLVVGAAAATFMVSVRSHWGRMFTSDGEILRLTAVALPIAGLCELGNCPQTAG<br/> CGVLRGSARPASGARINLASFYLVGMPVGVALAFGARLGFAGLWLGLLAAQA<br/> ACAVWMARAVAATDWDVEVARAKELTKASTTSGGTNHQHECNNSNTNTA<br/> NAKANTKTTTSPAANNINAGGGGSSDNRGYVPISESGHNDGSDDLEKLEEG<br/> MVATSGGCCCGDALGVDTKAGDKQQCSNGGAGTAEGNAGQRRGSASSER<br/> APLISVGDDEEAGEENDGDGGGGGHV<br/> MAGGDQRGDSPPSSHELSGRLEGILADGEAPWARRACKAAALEVRLAPIAAPA<br/> IVVYVPNNVLSISTQIFCGHLGNLELAASSLGNNGIQIFAYGLMLGMGSAVETL<br/> CGQAYGVHKYDMLGVYMQRSTVLLMATGVPLAVIYAFSRPILVLLGESPEIASA<br/> AAVFVYGLVPQIFAYAANFPIQKFLQAQSIVAPSAYTSAATLVHLVVGWL VVY<br/> QLGMGLLGASLVLSL SWWVIVAAQFVYIAASKRCRRTWTGFSWMAFSGLPEFL<br/> KLSTASAVMLCLETWYFQILILLAGLLDDPQLALDSLTVCM TLAGWMMISIGF<br/> NAAASVRVGNELGAGHPRAAAFSVVVVTAVSFVITVVMMAVFLMFRDYISYIFT<br/> EGETVARAVSDLCPLAATLILNGIQPVLSGVAVGCGWQKIVAYINVGCYYFVG<br/> IPLGFLLGK FHLGAKGIWTGMLGGTCMQTLILFWITFRTDWNKEVEEAKKRL<br/> NQWEDKKQPLLAGTVDY<br/> MGTESDQYPAHLSSSATVAGHGDDGESPEIAGAARLYVVGLIPQIFAYAANFPI<br/> QKFLQAQSIVAPSAYISAATLAAHVALSWFAVYKLGLGLLGASLILSL SWWVIV<br/> LAQFAYIVVSDRCRLTWAGFSSKA FSGLPEFLQLSAASAVMLCLETWYFQVTVL<br/> IAGLLKDPEIALDSLAVCMSISGWVFMVSVGFNAAASVRVSNELGAGNPRAAA<br/> FSVKVVTSLSLIVAAIIAAIVMCLREYLSYVFTQGEEVARAVSSMTPLLAVTIVLN<br/> GIQPVL SGVAVGCGWQAFVAYVNIGCYYIIGVPFGCVLGFHFDLGAMGIYGGM<br/> IVGLFVQTLILVYVTFRTDWNREVGEAKKRLNKWGDI AKPLLANED<br/> MGSSVKDAGGGKEEQQQQLESPLLEAAVSSGGDGGGGHGVSGELESILGDET<br/> VPWARRMWAATGVEMRLMLRLAAPAVLVYMINYLMSMSTQIFSGHLGTLEL<br/> AAASLGNTGIQVFAYGLMLGMGSAVETLCGQAYGAHKYDMLGVYLQRSTVL<br/> LMATGVPLAVIYAFSRPILVLLGESPEIASAAAVFVYGLVPQIFAYAANFPIQKF<br/> MQAQSIMAPSAYISAATLAFHLVLSYL VVYQFGLGLLGASLMLSISWWVIVVAQ<br/> FIYIVTSRRCRLTWTGFSMLAFSGLPDFFKLSLASAVMLCLETWYFQILVLIAGLL<br/> KDPEMALASLSVCMTISGWVFMISVGFNAAASVRVSNELGAGNPKSAAFSVVV<br/> VTVLSFFLSVVISLVILLCRDYISYIFTDGEDVATAVSKLTPLLALTILNGIQPVLS<br/> GVAVGCGWQAFVAYVNVGCYYIVGIPLGCLLGFYFDLGAAGIWSGMIGG TLM</p>                                                                                                                                                                                                                                                                                                                                                                                                                                                                                                                                                                                                                                         |
| OsMA<br>TE11 | <p>QKFLQAQSIVAPSAYISAATLAAHVALSWFAVYKLGLGLLGASLILSL SWWVIV<br/> LAQFAYIVVSDRCRLTWAGFSSKA FSGLPEFLQLSAASAVMLCLETWYFQVTVL<br/> IAGLLKDPEIALDSLAVCMSISGWVFMVSVGFNAAASVRVSNELGAGNPRAAA<br/> FSVKVVTSLSLIVAAIIAAIVMCLREYLSYVFTQGEEVARAVSSMTPLLAVTIVLN<br/> GIQPVL SGVAVGCGWQAFVAYVNIGCYYIIGVPFGCVLGFHFDLGAMGIYGGM<br/> IVGLFVQTLILVYVTFRTDWNREVGEAKKRLNKWGDI AKPLLANED<br/> MGSSVKDAGGGKEEQQQQLESPLLEAAVSSGGDGGGGHGVSGELESILGDET<br/> VPWARRMWAATGVEMRLMLRLAAPAVLVYMINYLMSMSTQIFSGHLGTLEL<br/> AAASLGNTGIQVFAYGLMLGMGSAVETLCGQAYGAHKYDMLGVYLQRSTVL<br/> LMATGVPLAVIYAFSRPILVLLGESPEIASAAAVFVYGLVPQIFAYAANFPIQKF<br/> MQAQSIMAPSAYISAATLAFHLVLSYL VVYQFGLGLLGASLMLSISWWVIVVAQ<br/> FIYIVTSRRCRLTWTGFSMLAFSGLPDFFKLSLASAVMLCLETWYFQILVLIAGLL<br/> KDPEMALASLSVCMTISGWVFMISVGFNAAASVRVSNELGAGNPKSAAFSVVV<br/> VTVLSFFLSVVISLVILLCRDYISYIFTDGEDVATAVSKLTPLLALTILNGIQPVLS<br/> GVAVGCGWQAFVAYVNVGCYYIVGIPLGCLLGFYFDLGAAGIWSGMIGG TLM</p>                                                                                                                                                                                                                                                                                                                                                                                                                                                                                                                                                                                                                                                                                                                                                                                                                                                                                                                                                                                                                                                                                                                                                                                                                                                                                                                                                                                                                                                                                                                                                                                                                                                                              |
| OsMA<br>TE12 | <p>QKFLQAQSIVAPSAYISAATLAAHVALSWFAVYKLGLGLLGASLILSL SWWVIV<br/> LAQFAYIVVSDRCRLTWAGFSSKA FSGLPEFLQLSAASAVMLCLETWYFQVTVL<br/> IAGLLKDPEIALDSLAVCMSISGWVFMVSVGFNAAASVRVSNELGAGNPRAAA<br/> FSVKVVTSLSLIVAAIIAAIVMCLREYLSYVFTQGEEVARAVSSMTPLLAVTIVLN<br/> GIQPVL SGVAVGCGWQAFVAYVNIGCYYIIGVPFGCVLGFHFDLGAMGIYGGM<br/> IVGLFVQTLILVYVTFRTDWNREVGEAKKRLNKWGDI AKPLLANED<br/> MGSSVKDAGGGKEEQQQQLESPLLEAAVSSGGDGGGGHGVSGELESILGDET<br/> VPWARRMWAATGVEMRLMLRLAAPAVLVYMINYLMSMSTQIFSGHLGTLEL<br/> AAASLGNTGIQVFAYGLMLGMGSAVETLCGQAYGAHKYDMLGVYLQRSTVL<br/> LMATGVPLAVIYAFSRPILVLLGESPEIASAAAVFVYGLVPQIFAYAANFPIQKF<br/> MQAQSIMAPSAYISAATLAFHLVLSYL VVYQFGLGLLGASLMLSISWWVIVVAQ<br/> FIYIVTSRRCRLTWTGFSMLAFSGLPDFFKLSLASAVMLCLETWYFQILVLIAGLL<br/> KDPEMALASLSVCMTISGWVFMISVGFNAAASVRVSNELGAGNPKSAAFSVVV<br/> VTVLSFFLSVVISLVILLCRDYISYIFTDGEDVATAVSKLTPLLALTILNGIQPVLS<br/> GVAVGCGWQAFVAYVNVGCYYIVGIPLGCLLGFYFDLGAAGIWSGMIGG TLM</p>                                                                                                                                                                                                                                                                                                                                                                                                                                                                                                                                                                                                                                                                                                                                                                                                                                                                                                                                                                                                                                                                                                                                                                                                                                                                                                                                                                                                                                                                                                                                                                                                                                                                              |
| OsMA<br>TE13 | <p>QKFLQAQSIVAPSAYISAATLAAHVALSWFAVYKLGLGLLGASLILSL SWWVIV<br/> LAQFAYIVVSDRCRLTWAGFSSKA FSGLPEFLQLSAASAVMLCLETWYFQVTVL<br/> IAGLLKDPEIALDSLAVCMSISGWVFMVSVGFNAAASVRVSNELGAGNPRAAA<br/> FSVKVVTSLSLIVAAIIAAIVMCLREYLSYVFTQGEEVARAVSSMTPLLAVTIVLN<br/> GIQPVL SGVAVGCGWQAFVAYVNIGCYYIIGVPFGCVLGFHFDLGAMGIYGGM<br/> IVGLFVQTLILVYVTFRTDWNREVGEAKKRLNKWGDI AKPLLANED<br/> MGSSVKDAGGGKEEQQQQLESPLLEAAVSSGGDGGGGHGVSGELESILGDET<br/> VPWARRMWAATGVEMRLMLRLAAPAVLVYMINYLMSMSTQIFSGHLGTLEL<br/> AAASLGNTGIQVFAYGLMLGMGSAVETLCGQAYGAHKYDMLGVYLQRSTVL<br/> LMATGVPLAVIYAFSRPILVLLGESPEIASAAAVFVYGLVPQIFAYAANFPIQKF<br/> MQAQSIMAPSAYISAATLAFHLVLSYL VVYQFGLGLLGASLMLSISWWVIVVAQ<br/> FIYIVTSRRCRLTWTGFSMLAFSGLPDFFKLSLASAVMLCLETWYFQILVLIAGLL<br/> KDPEMALASLSVCMTISGWVFMISVGFNAAASVRVSNELGAGNPKSAAFSVVV<br/> VTVLSFFLSVVISLVILLCRDYISYIFTDGEDVATAVSKLTPLLALTILNGIQPVLS<br/> GVAVGCGWQAFVAYVNVGCYYIVGIPLGCLLGFYFDLGAAGIWSGMIGG TLM</p>                                                                                                                                                                                                                                                                                                                                                                                                                                                                                                                                                                                                                                                                                                                                                                                                                                                                                                                                                                                                                                                                                                                                                                                                                                                                                                                                                                                                                                                                                                                                                                                                                                                                              |

---

|      |                                                          |
|------|----------------------------------------------------------|
|      | QTLILMWVTFRTNWNREVEEAMKRLNKWEDKTPLLSE                    |
|      | MAGGVSDGGAHGAHGRLESILSDSSMPLARRAWAATTIELGLLTRIAAPAVV     |
|      | MYMINYLMSMSTQIFSGHLGNLELAAASLGNNGIQMFAYGLMLGMGSAVETL     |
|      | CGQAFGAHKYDMLGVYLQRSVLLTITGVPLAVIYGFSEPILVFMGQSPEIARA    |
|      | AAIFVYGLIPQIFAYAINFPIQKYMQAQSIVLPSAYISAATLALHVLSSWVVVYKV |
| OsMA | GLGLLGASLVLSISWWVIVAAQFAYIVTSPTCRHTWTGFTWQAFAGLWDFLKL    |
| TE14 | SAASAVMLCLESWYFQVLVLIAGLLPNPELALDALSVCMTISGWVFMISVGFNA   |
|      | AASVRVSNELGAGNPKAAYFSVWVVTISCAIISAILAVVILCLRNYISYLFTEGEV |
|      | VSNAVADLCPLLAITLILNGIQPVLSGVAVGCGWQQFVAYVNIGCYIYGVPLG    |
|      | VLLGFVFKLGVKGIWGGMLGGTCMQTAILVWVTLRTDWNNEVEEAQKRLNK      |
|      | WEDKKKEPLLTGIRDNN                                        |
|      | MGKLVSKSWQESKLLWHIAFPAILTAVFQFSIGFVTVGVFVGHIGQVELAAVTVV  |
|      | ENVIEGFAYGVLLGMGSALETLCGQAVGAGQVSM LGVYIQRSWIICGATAVILT  |
|      | PTYVFTAGILIGLRQPTDIAAVAGTYTRWVIPQLFAYAANFPLQKFFQSQSKVW   |
| OsMA | AMTAISGIALALHVVLNYIFLTRLGHLVAAALIGNVTWWLILAQFIYLVSGCF    |
| TE15 | PEAWKGFSMLAFKNLAAFVKLSLASAIMLCLELWYYTAVLILVGLLKDAKLQV    |
|      | DVMSVCINYQLWTLMV ALGFNAAVSVRVSNELGANRPKAAKFAVAMAVSTS     |
|      | AIVGAVFMAVFFIWRTQLPRFFSDDADVRESAKLGYLLAATIFLNSIQPVLSGV   |
|      | AIGAGWQSLVAFINIGCYLVGIPLGVLFGFKLKDAMGIWVGMSLGTLLQTAI     |
|      | LAFISFRTKWERQAMMAEERIREWGGRRND DALPSTTTPTADHDNVDR        |
|      | MAIPLQGKAQQQQGEGGKGDGAVDDDGDDQPSVASELRELWGMAAPITAL       |
|      | NCVVYLRAMVSVLCLGRLGPLDLAGGALAIGLTNITGHSVLFLGLASGLEPLCA   |
|      | QAFGSKNYDLLTSLQRAVLLLTLAALPIALLWLHVGPILVALGQDPTISASAA    |
|      | AYAAYALPDLAASAVLQPLRVYLSQGITKPMACSAIAVALHVPLNVLLVFG      |
| OsMA | LGFGVRGVAAAQALTNTNMVLFLLAYIRWSRACDATWKGWARPAAVASGLA      |
| TE16 | GLVRLAVPSCVGVCLEWWWYEVVTVLAGYLPDPAAAVGAAGVLIQTSLMYT      |
|      | VPMALAACVSTRVGNELGGGKPRRRARMAAMVALGCAVVIGVVHVAWTAAF      |
|      | SREWVELFTREAAVRLAAAAMPILGLCELGNCPQTTGCGVLRGTARPAVGA      |
|      | RINLLSFYLVGTPVAVTLAFGARVGFGLWYGLLSAQAAACVALVLLAVVWRT     |
|      | DWHLEALRAKKL TGLEMIAAAEGDDDECKRLIAPLPPPDGHDVAVDVV        |
|      | MTPPPSPPPHERKTWAEVASEFRAQRGIAFPLIAMNLTWFAKLAVTTAFLGRL    |
|      | GDLQLAAGTLGFSFANVTGFAVLTGLCAAMPICGQAHGASNGKLLRKTLM       |
|      | ATILLGASIPAFWLHVDVALLRFGQQADMSSNARSYVVCLLPD LAVTSFVN     |
|      | PLKSYLSAQGVTLPTLFASALALALHVPLTMWMARTRGIQGVATAVWVSDLA     |
| OsMA | VAVMLAGYVLVSERRRKAGGGGGWVEQTRGEWVRLRLAVPSC LNTCLEWW      |
| TE17 | CYEILVLLTGRLPDARRTVAVMAVTLNFDYLLFAGMLSLSVSASVRVSNELGAG   |
|      | EAWAARRAGMVSIVGGAVGGVGGGVAMVAARRAWGSIYSSDAGVREGVGR       |
|      | AMEVM AVLEVNFPLNVCGGIVRGTA RPAVGMYAVVAGFYVLALPLGVALA     |
|      | FKARLGIQGLLLGFLVGAAASLAVLLTFIARMDWPAEAQKARTRTTATVAQFH    |
|      | QHDEVVQP                                                 |
|      | MAAPPSMEEPLLGGNGEEKKGGSSRLAVVAEVRKQLYLAGPLIAGWLLQNV      |
| OsMA | VQMISVMFVGH LGELELSSASIATSFAGVTGFSLLAGMASSLDTL CGQAFGAKQ |
| TE18 | HRLVG VYKQRAMVVLGLASVCVAAVWAYTGELLLLFGQDPEIAAAAAGSYIRW   |
|      | MIPALLAYGPLQCHVRFLQTQNAVMPVMLSSGAAAACHLPVCWLLVYGAGL      |

|              |                                                                                                                                                                                                                                                                                                                                                                                                                                                                                                                                                                                                                                                                                                                                                                                                                                                                                                                                                             |
|--------------|-------------------------------------------------------------------------------------------------------------------------------------------------------------------------------------------------------------------------------------------------------------------------------------------------------------------------------------------------------------------------------------------------------------------------------------------------------------------------------------------------------------------------------------------------------------------------------------------------------------------------------------------------------------------------------------------------------------------------------------------------------------------------------------------------------------------------------------------------------------------------------------------------------------------------------------------------------------|
| OsMA<br>TE19 | <p>GSKGAALANAVAYLANAAALAAAYVRLSPACRSTWTGFSSEAFHDLVGFMRLA<br/>VPSALMVCLEWWSFELLVLLSGLLPNPKLEASVLSICLNSGSLAFMIPFGLGSAIS<br/>TRVSNELGAGRPEAARLASRVVMALGLVVGVAIGLAMILVRHLWGYAYSNEE<br/>EVVQYVAKMMPILAVSFLFDDLQCVLSGVARGCGWQKIGAIVNLGAYYLVGIP<br/>AALCFAFVYHLGGMGLWLGIMCALIVQMLLLLAITVCTNWEKEALKAKERVF<br/>SSSLPADMT</p> <p>MTTCADDQTGCAFFAPLLSSKGAENVILVAGDEAEEQQPAPVLTSPKPPGRLAK<br/>AVNEAWSVSLGVAFPVTPSMFTCSARGEARSILGLAFPMILTGLLLYLRSISMML<br/>FLGHLGGLALAGGSLAIGFANITGYSVLSGLAMGMEPICGQAFGAGNYALLGV<br/>TMQRTVLLLIAAAPIGGLWVQMRPLLLFCGQDAAIAAVAETYIFASLPDLVLQ<br/>AFLHPVRIYLRQTSINLPLTVCAGLAIAIHLPIYVLLVVLGLGVKAVALASVLA<br/>NLNLVLFLLAYIFLKGVHKRTGGFLLSAESFRGWGELISLALPSCVSVCLEWWW<br/>YEIMILLCGLLLNPQATVASMGIQTTSLIYIFPSSLSFGVSTRVSNELGAGQPEE<br/>ASRAATVGLVLGFGFGAFASAFALVRNVWASMFTADPAIVALTASVLPILGLC<br/>ELGNCPQTTGCGVLRGSARPKDAASINLRSFYLVGTPVALVMAFWFHLDLFRGL<br/>WFGLLAAQATCTVRMLLVIGRTDWAAEAKRSKQLTGAGAAANMESDDRVAA<br/>DEKSRLPVDTDVERSSDHTDRC</p> |
| OsMA<br>TE2  | <p>MAAAAREEQPLLLRREEGEEEGEEVGVRRRWGSEAGKLAYLALPMVAVSLTN<br/>YAVQVFSNMMVGHLPGLVPLSSAAIATSLASVTGFSLLIGMASALETLCCGQAYG<br/>AKQYHTLGVHTYRAILTLVVCIPSLWVFMGKILVLIGQDPLISHGAGRYIVW<br/>LIPGLFANALIQPITKFLQSQSLIMPMLVASVATLVFHIPLCWLMVFKTGLGYTG</p> <p>AALISISYWLNVAMLVAYILLSSSCKETRTPPTIEAFKGLDGFLRLALPSALMICL<br/>EWWSFELLILMSGLLPNPELQTSVLSICLTSITLLFTIPYGLGAGGSTRVANELGA<br/>GNPEGARSAVYVLSVAVTEALIVCGTLLASRRLGRAYSSSEEVISFVAMMVPL<br/>VCITVVTDLQGVMSGIARGCGWQHLGAYVNLGSFYLLGIPMAILLGFVLHM<br/>GAKGLWMGIVCGSISQITLLSAITFFTQWQKMAENARERVFSEKPTPSRYHLV<br/>E</p>                                                                                                                                                                                                                                                                                                                                                                                                 |
| OsMA<br>TE20 | <p>MEERIPLLSKRFPADGTAGVGGGREEEGGDRWWSGLAREAGKVGSMALPMA<br/>AMSVAQNAVQVASNMMVGHLPGLVPLSASAIATSLASVSGFSLLVGMASGLE<br/>TLCCGQAYGAKQYDKLGVQTYRAIVTLTVVTIPISLLWVFIGKLLTLIGQDPVISHE<br/>AGRYIVWLIPGLFAYAVCQPLTKFLQSQSLIFPMLWSSIATLLHIPLSWLLVFKT</p> <p>SMGFTGAALASISYWLNTFMLAAAYIRFSCSKVTRSPPTIEAFRGVGLFLRIALPS<br/>ALMLCFEWWSFELVLLSGLLPNPELESSVLSICLTTTSLMYTIPYGLGGAASRV<br/>ANELGAGNPEGARSAVHLVMSIAGTEAVLVTGMLFAAQRLGYAYSSDEEVVT<br/>YFTSMVPFVCISVAADSLQGVLSGIARGCGWQHLGAYVNLGSFYLVGIPVALLL<br/>GFGFKMEGKGLWLGACGSVLQFLLAVIAFFSNWQKMAEKARERIFGETPSEK<br/>QHLVLDATNSV</p>                                                                                                                                                                                                                                                                                                                                                                                       |
| OsMA<br>TE21 | <p>MAAKGSPEEEALLAGVGGDHQLVESDELAPAAAVVREEVKKQLWLAVPLVA<br/>GALLQNVIQMISVMFVGHGELPLAGASMASFASVTGLSLLLGMASALDTLC<br/>GQAFGSRQYHLLGVYKQRAMLLLTAVSVPLVVVWFYTGDLVAFGQDADIAA<br/>EAGAYARWMIPALFAYGPLQCHVRFLQTQNVVLPVMASAGAAALCHLVVCW<br/>ALVYAAGMGSKGAALSNAVSYWINVAILAVYVRVSSSCKKTWTGFSMEAFHD<br/>PLSFFRLAIPSALMVCLEMWSFELIVLLSGILPNPKLETSVLSISLNTAAFVWMIPF<br/>GLGSAISTRVSNELGAGRPRARLAVRVVVFMAVSEGLVIGLVLVGVRYIWGH</p>                                                                                                                                                                                                                                                                                                                                                                                                                                                                                                                                          |

---

|              |                                                                                                                                                                                                                                                                                                                                                                                                                                                                                                                                                                                                                                                                                                                                                                                                                                                                                                                                                                                                                                                                                                                                                                                                                                                                                                                                                                                                                                                                                                                                                                                                                                                                                                                                                                                                  |
|--------------|--------------------------------------------------------------------------------------------------------------------------------------------------------------------------------------------------------------------------------------------------------------------------------------------------------------------------------------------------------------------------------------------------------------------------------------------------------------------------------------------------------------------------------------------------------------------------------------------------------------------------------------------------------------------------------------------------------------------------------------------------------------------------------------------------------------------------------------------------------------------------------------------------------------------------------------------------------------------------------------------------------------------------------------------------------------------------------------------------------------------------------------------------------------------------------------------------------------------------------------------------------------------------------------------------------------------------------------------------------------------------------------------------------------------------------------------------------------------------------------------------------------------------------------------------------------------------------------------------------------------------------------------------------------------------------------------------------------------------------------------------------------------------------------------------|
|              | <p>AYSDEEEVVITYVAKMMLVIAVSNFFDGIQCVLSGVARGCGWQKIGACVNLGA<br/> YYIVGIPSAYLIAFVLHVGGMGLWLGIIICGLLVQVLLMAITLCTNWDKEAANA<br/> KDRVFSSSLPSDLAT</p> <p>MEKASCLEEALLLPESCKEEEITASDEVKRQLRLAGPLIAGSLLQNLIQMISVMF<br/> VGHLGELPLAGASMASSFAAVTGFSLLLGLASALDTLCGQAFGARQYHLLGVY<br/> KQRAMLLLTAVSVPLAVAWYYTGDILLFGQDADIAAEAGAYARWMIPALFA<br/> YGPLQCHVRFLQTQNMVVPVMAAAGAAALCHLGVCWALVHAAGMGSRGAL</p>                                                                                                                                                                                                                                                                                                                                                                                                                                                                                                                                                                                                                                                                                                                                                                                                                                                                                                                                                                                                                                                                                                                                                                                                                                                                                                                                                                                                         |
| OsMA<br>TE22 | <p>ALGNAVSYWINVGVLA VYVRVSRSCKKTWTGFSMEAFRDPLSFFRLAIP SALM<br/> VCLEWWSFELLVLLSGLLPNPKLETSVLSITLNTANCLFMIPFGLGAAISTRVSNE<br/> LGAGRPRARLAVRVVTLATLEGLGMALVLACVRYVWGHAYSNEEEVVAY<br/> VAKMMLVLAVSNFLDGIQCVLSGVARGCGWQKIGACINLGAFYVVGVPAAYL<br/> AAFVLRAGGLGLWMGIICGVAVQTLLFLAITSRTDWQKEAKMAKDRVFSSSLP<br/> TDLAT</p> <p>MCTTTSAPSVPEVATPADGGGHHVYVSLPQCTDGGDVEGGHCRPVVHQVKC<br/> RGGDDDDGGGGGRGGGVMPAAGETVREAAALCRLACPIALTALMLYSRSALS<br/> MLFLGSLGDLPLAAGSLAVAFANITGYSVLSGLSLGMDPLCSQAFGARQPRLLG<br/> LTLYRSVLFLLCCSLPLSALWLNMAKILLFLGQDRDITAMAQDYLLFSLPDLFSFS<br/> LIHPLRVYLR SQGITQPLAVAAAAAVVFHVPANYVLVGRRLRGAPGVAAAASA<br/> SNFVLLAVLLAYVARRDEALREAGGPTAEWLAWGGLARLAAPSCVSVCLEW<br/> WWYEVMI LLCGLLPEPRPAVASMGVLMQTTALVYVFPSSLGFGVSTRVGNELG<br/> ANRPGRARAAAHVAVAGAAAMGLAAMAFATGMRHAWGRLFTADADILRL<br/> TAAALPVVGLCELGNCPQTVGCGVLRGTARPARAAHVNLGAFYLVGMPVAV<br/> VLAFLGLGVGFVGLWVGLLAAQVCCAGLMLCVVGSTDWEAQARRAQALTSSA<br/> AVSGKADAAEGGGRWPEKGEHQEWKRRHVALISSEADPETA EVL<br/> MSGGGGEVEAAAEAAPLLVPHDPQPAVGAEVRRQVGLAAPLVACSL LQYSLQ<br/> VVSVMFAGHLGELSLSGASVASSFANVTGFSVLLGMGSALDTFCGQSYGAKQY<br/> DMLGTHAQRAIFVLMMLMGVPLAFVLAFA GQILIALGQNPEISSEAGLYAVWLIP<br/> GLFAYGLLQCLTKFLQTQNI VHPLVVCSGATLVIHILLCWVMVHCFDLGNRGA<br/> ALSISLSYWFNVILLAIYVKVSEVGRRSWPGWSREALKLKDVNMYLRLAIPSTFM<br/> TCLEYWAFEMVVLLAGFLPNPKLETSISLISLNTMWMVYTIPSGLSAISIRVSNE<br/> LGARNPQAARLSVFVSGIMCLTEGILVAIITVLVRDIWGYLYSNEEEVVKYVAA<br/> MMPILALSDFMDGIQCTLSGAARGCGWQKVC SVINLCAYYTIGIPSAVTF AFVL<br/> KIDGKGLWLGIIICAMTVQILALVVM LRTSWNEEA EKARARVQGS DGRITLA<br/> MGGDERAVAAPLLQQQQDGGGGDGERRRRRWWWGWDGEEAAGQLAFA<br/> APMVATSMAYYAIPLVSVMYAGRLGELELAGATLGNSWGTVTGIALMTGLSGS<br/> LETLCGQGYGAKMYHMMGVYLQASIITSAFFSVLV SLLWFYSEPVLI FLRQDPEV<br/> TRTATLFLRYSIPAQFAYGFIQCTLRFLQTQS VVTPLVV FALLPLVLHFGITHAFV</p> |
| OsMA<br>TE23 | <p>HYLGFGYAGAGMSTSVSLWLSFLMLAAYVCLSERFKHTWEGFSTEAFRHVLP G<br/> LKLAIPSAVMVC FEYWAFEVLVLVAGLMPNSHMSTSIAMCENTE AISYMITYG<br/> FAAAISTRVSNELGAGNVAKAKKALAVTLVLSLLLGVAFLLLLGLGHDLWAGL<br/> FSKSDA VISEFASMTPLLIGSVVLDSTQGVLSGVSRGCGWQH LAAWTNLVAFYI<br/> VGLPLSILFGFKLGLQTKGLWLGQICGLLLQNAVLLFITLRTKWERLELT MNGK<br/> EDGFVC</p>                                                                                                                                                                                                                                                                                                                                                                                                                                                                                                                                                                                                                                                                                                                                                                                                                                                                                                                                                                                                                                                                                                                                                                                                                                                                                                                                                                                                                                                                     |
| OsMA<br>TE24 | <p>MASTDPLLGGKEEEE GGGEVRRARRWWVGRVVDTEEAWAQTRFAVPMVL TN</p>                                                                                                                                                                                                                                                                                                                                                                                                                                                                                                                                                                                                                                                                                                                                                                                                                                                                                                                                                                                                                                                                                                                                                                                                                                                                                                                                                                                                                                                                                                                                                                                                                                                                                                                                     |

---

|      |                                                                                                                                                                                                                                                                                                                                                                                                                                                                                                                                                                                                                                                                                                                                                                                                                                                                                                                                                           |
|------|-----------------------------------------------------------------------------------------------------------------------------------------------------------------------------------------------------------------------------------------------------------------------------------------------------------------------------------------------------------------------------------------------------------------------------------------------------------------------------------------------------------------------------------------------------------------------------------------------------------------------------------------------------------------------------------------------------------------------------------------------------------------------------------------------------------------------------------------------------------------------------------------------------------------------------------------------------------|
| TE26 | <p>MSYYAIPLVSVMFSGHLGDVHLAGATLGNSWATVTGYAFVTGMSGALETLCG<br/> QAYGARMYRMLGLYLQSSLLMSAAVSVLVSALWCFTEPLLLLLRQDPAVSAAA<br/> SAFVRAQVPGLFAFSFLQCLRLYLQTSVVAPLVACSLAPFLHVALAHLLVNA<br/> LGLGLAGAGAAVSITFWASCLMLLAYVLRSERFAETWNGFSAEAFRFVPTIKL<br/> ATPSAVMVCLEYWAFELLVLIAGLLPNPTVSTSLIAMCSSTEAIAYMITYGFSAA<br/> VSTRVSNEIGAGNVEGAKNAVAVTLKLSVFLAAAFVLLLGFHGLWAGLFSGS<br/> AIIAAEFAAVAPLMMASILLDSAQGVLSGVARGCGWQHLLAAVTNLVAFYVIG<br/> MPLSIFFAFKLKWYTKGLWMGLICGLTCQTCTLMVITARTKWSKIVDAMQEKK<br/> ASYVA</p> <p>MGHAVDGRLEALLSGGGGGGEEAAPWARRMAAAAALRLRLAPLAAPAVV<br/> VYMLIIVMSSATQIFCGQLGNVQLAASSLGNNGIQVFAYGLMLGMGSAVETLC<br/> GQAYGAGRHEMLGVYLQRSVLLTAAGVPLAALYACSERVLLLLGQSPEISRA<br/> AAGFARGLIPQIFAYAANFPIQKFLQAQSIVAPSAAVLAASFALHPLSWAAVR</p>                                                                                                                                                                                                              |
| OsMA | VLGLGLPGAALALSATWWVLVAGQFAYIVRSPRCAATWTGFTWAAFHDLAA                                                                                                                                                                                                                                                                                                                                                                                                                                                                                                                                                                                                                                                                                                                                                                                                                                                                                                       |
| TE27 | <p>FARLSAASAVMLALEVWYFQVLILLAGMLPDPQIALDALTVCTSIQSWVFMISV<br/> GFNAAAASVRVGNELGAGNPRSAAFSTWMVTALSIIIAAIAGVVILLRDKLSYI<br/> FTQGEAVSRAVSDLCPLLVGTVLTCGIQPVLSGVAVGCGWQALVAYINIGCYLI<br/> GLPLGVLLGFKFDYGIKGLWGGMIGGTLIQTLILIWITFRTDWNKEVEDARRRL<br/> DKWDDTKQPLLVRNQ</p> <p>MEDEATSVAAPLLRPRGGVDAEAVKQQLWPAGARVAGEWWVESKKLWRVV<br/> GPAIFQRIALYGINVVSQAFIGHMGDLELAAFSIASTVVAGFNFGFLGMASALE<br/> TLCGQAFGAKKYHMLGVYLQRSWLVLMMFAVALTPTYVLMEDLLLLIGQPAD<br/> LASLAGKMSVWLLPQHFAAMMLPLTRFLQSQLKNWVTAVTAGVALALHLVI</p>                                                                                                                                                                                                                                                                                                                                                                                                                                           |
| OsMA | TYLLVNTLHLGLLGAVAAANVAWWIVVLGQLVYVVGWCPLSWKGFSEAF                                                                                                                                                                                                                                                                                                                                                                                                                                                                                                                                                                                                                                                                                                                                                                                                                                                                                                         |
| TE28 | <p>ADFWEFIKLSSASGVMLCLENWYYRVLVLLTGYLNNAEIAVDALSICLTINGWE<br/> MMIPFGFLAATGVRVANELGAGSGKGARFAIVVSVTTSVAIGLVFWCLIIAYND<br/> KIALLFSSSKVVLDAVSDLSVLLAFTVLLNSVQPVLSGVAIGSGWQALVAYVNV<br/> GSYYLVGVPIGAILGWPLHFVGGIWSGLIGGTAVQTLILAYLTISCDWDEEAK<br/> KASTRMEVWASSK</p> <p>MCHCSSKVVAVAQCHQPLLPPPEACPALHDRPRSARGGGGAIAEVASIVRLA<br/> MPMVGAGLLMYMRSLVSMLFLGRLGRLPLAGGSLALGFANITGYSVLSGLAAG<br/> MDPVCGQAFGAGRTSVLAAALRRTVVLLLAASVPIAALWLAMHRVLVAAGQ<br/> DPDIAACAYEFILCSLPDLAVQSFLHPLRVYLRAQSITLPLTYAAAAALALHVPV<br/> NVLLVHGLGLGIRGVALAAVWTLNLFLLFLVAYAYFSGLIRGDDDDDDGGNGK<br/> AGEEGATTTTTTMEWGWLVKLSVHSCMSVCLEWWWYEIMVLLCGVLADPKA<br/> AVAAMGILIQTTSLLYIFPHSLSCAVSTRVGHELGAGRPERARLAARVGLACGA<br/> ALGVVACAFAASLRGVWARMFTADATILRLASSALPILGAAELGNCPQTVGCG<br/> VLRGSARPGRAARINVSIFYGVGMPAALALAFWPARDFRGMWAGMLAAQL<br/> VCAALMLLAVRRTDWDEQAARAREITGAVAGVVVGDDVVKGDHADA<br/> VKADSGLLVVTVLS</p> <p>MLIDPPCNRIHSARTQLQRCRTTTTGGLSALRYTVRGLSLLYMCTASSCAHTHT</p> |
| OsMA | HNRTEGGARTGLRSEMAPPAGTEAAGAGHRKNWRGESGNLWRIAGPVILTEI                                                                                                                                                                                                                                                                                                                                                                                                                                                                                                                                                                                                                                                                                                                                                                                                                                                                                                      |
| TE3  | <p>FQFLIGFVTAAFVGHIGKVELAAVSVVNGVVEGLAFGLLLGMGSALETLCGQA<br/> VGAGQPRMLGVYLQRSWVICLATSLALLPLYLLASPALRLLRQSAAISSVAGRY</p>                                                                                                                                                                                                                                                                                                                                                                                                                                                                                                                                                                                                                                                                                                                                                                                                                                  |

---

|              |                                                                                                                                                                                                                                                                                                                                                                                                                                                                                                                                                                                                                                   |
|--------------|-----------------------------------------------------------------------------------------------------------------------------------------------------------------------------------------------------------------------------------------------------------------------------------------------------------------------------------------------------------------------------------------------------------------------------------------------------------------------------------------------------------------------------------------------------------------------------------------------------------------------------------|
|              | <p>ARWCAPQLFAYAVNFPMQKFYQAQSRVWAVTAISAAALAAHALLNWLVVA<br/> RLGHGVVGAALVGDVSWWLLNAAQFAYLVGGSFPEAWSGFSRKAFTSLGGFV<br/> KLSLSSAVMLCLEMWYYTAVLILVGCLKNPEIQVGAISICMNYQLWTLMAVG<br/> FNAAVSVRVANELGANHPKAAKFSVIVAVVTSAAVGLVFTLVALVARKQLPRL<br/> FTDDDLVRETAKLGYLLAATIFLNSIQPVLSGVAIGAGWQSSVAFVNIGCYYL<br/> VGLPIAAVFGFRLSLNATGIWVGMLIGTILQTVILLVILYRTKWQKEAMLAERI<br/> KVGWGGVELP</p> <p>MSSTSGSAWDHSNNGGGGSPELREALLLGDGGSSPESREIKGIAVKKQDDLEEI<br/> RSVGELMRLAAEENRRLWYLAGPAIFTSLAQYSLGAVTQVFAGHLTTLELDAV<br/> STENMVIAGLAFGIMYGMGSALETLCGQAFGAKQHHMLGIYLQRSWVILTAM<br/> SVILLPIYLFATPILRFFHQDDEIAVLASRFSLYMIPQLFAYALNFPIQKFLQAQSK</p> |
| OsMA<br>TE30 | <p>VMAMAAVSAAVLLFHVALTWLLLVPLRMGLVGLAVALNVSWWLVVLGQLA<br/> YIVMGYCPGAWNGFDWLAFTDLLSFARLSLGS AIMICLEFWFYMFLIVVGNLP<br/> NAQVAVAAVSICTNLFGWQIMVFFGFNAAISVRVSNELGAGRPRARLAIAVV<br/> LVSSVAIGVAFFAAVLLLRDVYGAPFTGSPEVVRAVASLGVVFAFSLLLNSVQPV<br/> LSGVAVGAGWQWLVA YINLGCYCYVGIPVGYAIAFPLRRGVQGMWGGMLTG<br/> VGLQTAILVAITARTNWNKEASEAHARIQHWGGTAKLAVDDPI</p> <p>MGSVSPPAPEEDAAAVESAGAAARMFWHETKRLWAIGTPIAIGTITNYAISSVT<br/> TMFIGHLGNLPLAAASVGLSVFATFALGFLLGMGSALETLCGQAFGAGQVSML<br/> GVYLQRSWIILLGATVLMVPVYVLAEP LLLL VGQDPEVARAAGRFTLYILPGAF</p>                                                                                    |
| OsMA<br>TE31 | <p>AFAVNFPSGKFLQAQSKVGLAWIGVAGLAFHVGITYLAVSVLWGWLPGAAA<br/> AYDVSQWASSLAQVAYIMGWCREGWRGWSMAAFHDLAAFLRLSIESAVMLC<br/> LEIWYLG LITVLTGDLDDAQMAVDLSL GICMNINGYEGMIFIGLNAAISVRVSNE<br/> LGSGRPRAAMHAVVVVVAESLLIGLLCMALVLA FSDKLALVYTS DAHLLRAVS<br/> RIAGLLGVTMVLNSVQPVLSGVAVG GGWQGLVA YINLACYYLFGLPVGYLLG<br/> YYFNLGVGVPIPIPIPTYLPSLFFFPLI</p> <p>MASVPLLAEWPAGKEKEEGRVRRRLPALAREAWEEKKLWEIVGPAVFLRLVL<br/> YSFNIISQAFAGHIGDLELA AFSIANNVITGLNFGFLLGMASALETLCGQAYGAK<br/> QCSMLGIYLQRSWIILFVFAVLLVPTYVFTAPLLEALGQPAALARKAGMVSVM<br/> LP SHFQYAVLLPLNKFLQSQRKNWVTVVTAAA AFPVHIAVSWLLVSRLRFGVL</p>                                   |
| OsMA<br>TE32 | <p>GAAMSLGVSGWLVTLLQLAYVVG GCPVTWSGFSPLAFVDLWGFVKLSVSSG<br/> VMVCLETWYYKILILLTGHLKNS ELAVNALSICMSFQSWEMMIPVGFLAGTGV<br/> RVANELGAGNGKGAKFATIVSTTTSFLIGLFFSALALAFHDKIALVFSSSNAVID<br/> AVDNISFLLAVTILLNGVQPVLSGVAIGSGWQAAVAYVNIGCY YFIGVP IGVLL<br/> GWSFNLGVFGIWAGMIAGTAIQTIILAHMTIQCDWNKEVLQASERVQRWGNP<br/> K</p> <p>MASRHSDEATQCHQQLLVM PAATASYPKLHDRPRLAGAAAGVLGEVASILCL<br/> AGPMVGAGILLYLRLSVSMVFLGRLGQLPLAGGSLALGFANITGYSVLSGLAGG<br/> MDPVCGQAFGAGRTDLLRAALRRTVVLLLAASVPISALWVAMHRVLVATGQ</p>                                                                                                                             |
| OsMA<br>TE33 | <p>DPDIAATAYAYILCSLPDLAVQCFLHPIRIYLRAQSVTLPLTYAAAAALLHVPI<br/> NVVLVDRLGLGIRGVALGAVCTNLNCLLFLAAYVCLSGMYGGRAKACASAAA<br/> PAAGEEDDDGGVREWWSLVRLSVHSCMSVCLEWWWYEIMVLLCGVLADPKA<br/> AVAAMGVLIQTTS LIYIFPHSLGCAVSTRVGHELGAGRPERARLVARVGVLGA<br/> ALGIVAFGF AVSVRAAWARMFTAEDAILRLAAAALPLLGAELGNCPQTAGC</p>                                                                                                                                                                                                                                                                                                                            |

---

|              |                                                                                                                                                                                                                                                                                                                                                                                                                                                                                                                                                                                                                                                                                                                                                                                                                                                                                                                                                                                              |
|--------------|----------------------------------------------------------------------------------------------------------------------------------------------------------------------------------------------------------------------------------------------------------------------------------------------------------------------------------------------------------------------------------------------------------------------------------------------------------------------------------------------------------------------------------------------------------------------------------------------------------------------------------------------------------------------------------------------------------------------------------------------------------------------------------------------------------------------------------------------------------------------------------------------------------------------------------------------------------------------------------------------|
| OsMA<br>TE34 | <p>GVLRG SARPERA ARINVA AFYGVGMPVALALAFWPAGLDFRGMWGGMLAA<br/> QLVCAWLMLRAVLGTDWAEQAERARELTGGGDGYAAVA AVIVDDDKAKQH<br/> AEMDKPQQVDNTLLMAIDCV<br/> MELAGGGTG VVRQRAEPLGAGLLLRGGGRSVGGGGIGCARRATLRGLALSPL<br/> ARRAVSAAGGHFLPRRAVRAAAAAGDGGFYGEEDAASDQPF PARASPSDDA<br/> NDSTAVRSLGGDHPGEIKKELLNLALPAIVGQAIDPVAQLLETAYIGRLGPVEL<br/> ASAAVGVSVFNIISKLFNIPLLSITTSFVAEDVARHDSQFTSEGNMSESSESGRKR<br/> LPSISSAILLAAAIGVIEASALILGSEILLSIMGVSHASTMHSPAKLFLSLRALGAPA<br/> VVVSLAIQGFIRGLKDTKTPLLYSGLGNISAVLLLPFLVYSLNLGLNGAALATIAS<br/> QYLGMFLLLWLSKRAVLLPPKIEDLDFVGYIKSGGMLLGRTLSVLITMTLGT<br/> MAARQGTIAMA AHQICLQVWLAVSLLSDALAVSAQALIASSFAKLDYEKVK<br/> VTTYVLKIGLLVGAALALLFASFGRIAELFSKDPMVLQIVGSGVLFVSASQPIN<br/> ALAFIFDGLHFGVSDFSYSASSMITVGAISSFLLYAPKVFGLPGVWAGLALFMG<br/> LRMTAGFLRLGSRAGPWWFLHQKEPTYKLHSSTC<br/> QKLIRLFSSISLQEACGNQCELLRRCSDLHCHHEGGDGGA AHRRQQWRRGG<br/> EERRRGGGVGGDRDQEA AVPRRAARRRHVAAERRPDDFRHVRP RRARPLQ<br/> RLHGHLLRRRHRLQLAGWHGEQPGHAVRPGVRREAAPHARRVQAAGDAGA</p> |
| OsMA<br>TE35 | <p>RAGERPDRGGLGLHRRDPPRRPGPGDRGGRRELHPVDDPDAVRLRAAAVPR<br/> PVPADAERRRAGDALRRRDGGEPRARLLAARAQARAGRQRRARQRLLPH<br/> QPLRAGHLRLATRVVMLLAFLVGTSEGLVMVIVRN LWGYAYSNEEEVADYIAK<br/> MMPILAVSILFDAIQCVLSGVVRGCGRQQIGAFINLGAYLAGIPVAFFFAFVCH<br/> LGGMGLWFGILCGLVVQMLLLLTITLCTNWDKEALKAKDRVCSSSLPKDLAT<br/> MEGQGLVSRSWQESKLLWRVAFPAVLVELLQFSIGFVTASFVGH LGVVELAAV<br/> TAVESILEGFAYGVLFGMGCALDTLCGQAVGAGRLDVLGLYVQQSWIVCGAT<br/> AVALTPTYAFAEPILRSLLRQPADVA AVAGPYALWSLPRLFAHAANFPLQKFF<br/> QTQSRVWALAAISAAVLAVHAALTYAAVVRLRYGLRGA AVAGNLSYWLIDA</p>                                                                                                                                                                                                                                                                                                                                                                                                                                              |
| OsMA<br>TE36 | <p>AQFVYLVSGRFPDAWKGFTMTAFSNLAAFVKLSLVS AIMICLEFWYYAALLILV<br/> GLLKNARLQLDIMSICINYQFWTMMVAMGFSE AISVRVSNELGARRPKEAKFS<br/> VAVASLTSAMIGAIFMSIFFIWR TSLPSLFSDDKEVVDGAARLG YLLAVTVFFGNI<br/> GPVLSGVAVGAGWQILVAFVNIGCYLVGIPFGVLF GFKLKL GALGIWMGMLT<br/> GTLLQMAILFFIIMRTKWEAQAILAEKRIS ELGETTAND<br/> MNGESLLDRSSSADAAMND AVPGHRHHHPLSVFLRDARLAFRWDELGREIM<br/> GIAVPGALALMADPVASLVDTAFIGHIGPVELAAVGVSIAVFNQVSRIAIFPLVS<br/> VTTSFVAEEDATSSDREKYEINGENEFNVSDSEMEELVSHEEASAAPSKSSFETDS<br/> SDVKIEHKRKNIPSVSTALLGGVLG LLQALLVICAKPLLGYMGVKQGSAML</p>                                                                                                                                                                                                                                                                                                                                                                                                                                          |
| OsMA<br>TE37 | <p>MPALKYL VVRSLGAPAVLLSLAMQGVFRGLKDTKTPLYATVAGDATNIVLDPI<br/> FMFVFQYGVSGAAIAHVISQYFIASILLWRLRLHVDLLPPSFKHMQFSRFLKNGF<br/> LLLARVIAATCCVTLASMAARLGSPMAAFQICLQIWLASSLLADGLAFAGQ<br/> AILASAFARQDHSKAAATASRILQLGLVLG LLSIFLGIGLRLGSRLFTDDQDVL<br/> HHIYLGIPFVSLTQPINALAFVFDGINYGASDFGYAAYS MILVAIVSIIFIVTLASY<br/> NGFVGIWIALTVYMSLRMLAGFLRIGTARGPWTFYAAQRMHSHEVVGLC</p>                                                                                                                                                                                                                                                                                                                                                                                                                                                                                                                                                                                                                      |
| OsMA<br>TE38 | <p>MNTLT YMLIPISWTTIQRIHHFQPNKRLTVGDSIDMDESTVEEPLLAVRRGGDG<br/> EDGAMASTAAEVKRLRLAGPLMAGFVLRNSVQMV SVMFVGH LGELQLAGSS<br/> LAASLASVTGFSLLSGMSSALDTLCGQAYGAGQHRL LGVYAQRAMLVLA AAA</p>                                                                                                                                                                                                                                                                                                                                                                                                                                                                                                                                                                                                                                                                                                                                                                                                        |



|              |                                                                                                                                                                                                                                                                                                                                                                                                                                                                                                                                                                                                                                                                                                                                                                                                                                                                                                                                                                                                                                                                                                                                                                                                                                                                           |
|--------------|---------------------------------------------------------------------------------------------------------------------------------------------------------------------------------------------------------------------------------------------------------------------------------------------------------------------------------------------------------------------------------------------------------------------------------------------------------------------------------------------------------------------------------------------------------------------------------------------------------------------------------------------------------------------------------------------------------------------------------------------------------------------------------------------------------------------------------------------------------------------------------------------------------------------------------------------------------------------------------------------------------------------------------------------------------------------------------------------------------------------------------------------------------------------------------------------------------------------------------------------------------------------------|
| OsMA<br>TE39 | <p>VPIALVWASAGEILLFGQDPAIAAEAGAYARWMIPSLAAYVPLACALRFLQA<br/> QGIVVPVMASSGVA AVAHVAVCWALVHKAGMGSKGAALSGAVTYWTNFAV<br/> LAFYARLSGACKTTWTGFSMNAFRELRRFTELAVPSAMMVCLEWSSFEILVLLS<br/> GILPNPQLETAVLSISLSTASLLIMVPRGIGSSLSTRVSNELGGGHPRAARMAVRV<br/> ATAMTVLVCLVLVIAMILLRNWGYAYSNEEEVVAYIASMLPILAVSFFVDGIN<br/> GALSGVLTGCGKQKIGAHVNLGAFYLVGIPTAVLLAFVLHLNGEGLWLGI VCG<br/> SISKVGMLLFITLHTDWGKEVQKASPCKHFGLYHVFSGTSV<br/> MEKPAASVEEPLLVGAGEKKGESAAAAELKRLRLAGPLVASGVLRNVVQMV<br/> SVMFVGH LGELPLAGASLATSLANVTGFSLLFGMASALDTL CGQAYGARQHH<br/> LLGVYKQRAMLVLA VAAVPIALVWASAGEILLFGQDPAIAAEAGAYARWLIP<br/> SLVPFVPLVCHIRFLQAQSAVLPVMASCGVTAASHVAVCWALVRKAGMGSRG<br/> AALANAVSYGVNLTIMSLYVRLSRSEKTTWTGFSMEAFREL RQYAELAIPAAM<br/> MVCLEWWSFEFLVMLSGLLPNPKLETSVLSICLNTGALLVMVPIGLSTAISTRVW<br/> NELGAGNPQA AKLATRVVICMAMTEGSVVAFTMILLRNSWGHMYSDEAEVV<br/> TYIARMIPVLAISFFIDGMHSALSGVLTGCGKQKIGARVNLGAFYLAGIPMAVFL<br/> AFVLHLNGMGLWLGI VCGSLSKLILLFWITMSINWEKESTRAKELVFSSSLPVA<br/> MARSSAPESMEADHQLTATVTAASGDMPVTEQQQKQMVAVAAPPATEN<br/> ADAAGGGGGDNGDHLPTATSL LGGARRTGLHLFVLNARSALRLDELGAEVL<br/> RIAVPASLALTADPLASLIDTAFIGRIGSVEIAAVGVAIAVFNQVMKVCYPLVSV<br/> TTSFVAEEDAILSKGAAGADDDNDGDHDAKGHGASAAAVADPEKQQVVG<br/> DSAETNGAEVSTA AVRITDDKAAAAGVGVGKRRRFVPSVTSALIVGAFLGL</p> |
| OsMA<br>TE4  | <p>LQAVFLVAAGKPLL RIMGVKPGSPMMIPALRYLVVRSLGAPAVLLSLAMQGVF<br/> RGFKDTKTPLYATVTGDLANIALDPILIFTCRFGVVGAAIAHVISQYLITLIMLCK<br/> LVRKVDVIPSSLKSLKFRFLGCGFLLARVAVTFCVTLAASLAARHGATAMA<br/> AFQICAQVWLASSLLADGLAVAGQALLASAFAKKDHYKVAVTTARVLQLAVV<br/> LGVGLTAFLAAGMWFGAGVFTSDAAVISTIHRGVPFVAGTQTINTLAFVFDGV<br/> NFGASDYAFAAYS MVGVA AVTIPCLVLLSSHGGFVGIWIALAIYMSVRAFAST<br/> WRMGAARGPWKFLRK</p>                                                                                                                                                                                                                                                                                                                                                                                                                                                                                                                                                                                                                                                                                                                                                                                                                                                                               |
| OsMA<br>TE40 | <p>EPLLA AAPPTPGKAADGDGPEEGRRLASAEAKRLRLAGPIVASCILQCVVNM<br/> VSMFVGH LGELPLAGASLATSLANVTGYSLTGMATAMDTL CGQAYGARQY<br/> HLLGVYKQRAMVVLA AACVPIALVWASAGRILLLLGQDAGIAAEAGAYARW<br/> MLPSLAAYVPLQCHIRFLQTQTVLPVTASSAATALLHPLVCWLLVFRAGMGS<br/> KGAALANAISYAVNLAILAVYVRASNTCKGRWSGFSGEAFKELRQFAALAMPS<br/> AMMICLEWWSFEILVLLSGLLPNPQLETSVLSICLNTGALLYMVPLGLCSSISTRV<br/> SNEIGAGQPQA AKRATRVVMYMALSEGLVISFTMFLLRNVWGYMYSNEQEVV<br/> TYIARMLPILDISFFIDGLHSSLSGVLTGCGKQKIGAAVN LGAFYLVGIPVAVLLA<br/> FYLHLNGMGLWLGI VCGSIKLLVLIIVSCCIDWEKEAILAKDRVFSSSLPVA<br/> MERTTEDDERPTVPLLEPKPASNEEEVGSVRRRVVEENKKLWV VAGPSICAR<br/> FSSFGVTVISQAFIGHIGATELAAYALVSTVLMRFSNGILLGMSALETLCGQSY<br/> GAKQYHMLGVYLQRSWLVL FCCAVILLPVYIFTTPLLIALGQDPEISAVAGTISL</p>                                                                                                                                                                                                                                                                                                                                                                                                                                                                                                                             |
| OsMA<br>TE41 | <p>WYIPVMFSYI WAFMLQMYLQAQSKNMIVTYLAFLNLGIHLFLSWLLTVKFQLG<br/> LAGVMGSMVISFWIPVFGQLAFVFFGGCPLTWTGFSSSAFTDLGAIMKLSLSSGV<br/> MLCLELWYNTILVLLTGYMKNAEVALDALSICLNINGWEMMISIGFLSAIGVRV<br/> ANELGAGSARRAKFAIFNVVTTSLIGFVLFVLFVFFRGS LAYIFTESKAVADEVA</p>                                                                                                                                                                                                                                                                                                                                                                                                                                                                                                                                                                                                                                                                                                                                                                                                                                                                                                                                                                                                                      |

|              |                                                                                                                                                                                                                                                                                                                                                                                                                                                                                                                                                                                                                                                                                                                                                                                                                                                                                                                                                                                                                                                                                                                                                                                                                                                                                                                                                                                                                                                                                                                                                                                                                                                                                                                                                                                                                                                                                                                                                                                                                                                                                                                                                                                                                                                                                                                                                                                                                                                                                                                |
|--------------|----------------------------------------------------------------------------------------------------------------------------------------------------------------------------------------------------------------------------------------------------------------------------------------------------------------------------------------------------------------------------------------------------------------------------------------------------------------------------------------------------------------------------------------------------------------------------------------------------------------------------------------------------------------------------------------------------------------------------------------------------------------------------------------------------------------------------------------------------------------------------------------------------------------------------------------------------------------------------------------------------------------------------------------------------------------------------------------------------------------------------------------------------------------------------------------------------------------------------------------------------------------------------------------------------------------------------------------------------------------------------------------------------------------------------------------------------------------------------------------------------------------------------------------------------------------------------------------------------------------------------------------------------------------------------------------------------------------------------------------------------------------------------------------------------------------------------------------------------------------------------------------------------------------------------------------------------------------------------------------------------------------------------------------------------------------------------------------------------------------------------------------------------------------------------------------------------------------------------------------------------------------------------------------------------------------------------------------------------------------------------------------------------------------------------------------------------------------------------------------------------------------|
| OsMA<br>TE42 | DLAPLLAFSILLNSVQPVLSGVAIGSGWQSVVAYVNVTSYYLIGIPLGAILGYVLG<br>FQAKGIWIGMLLGTLVQTLVLLFITLRTNWKQVEITRERLNRWYMDENGRSQ<br>NSIGNA<br>EVGSVRRRVVEENKKLWVAVGPSICARFSSFGVTVISQAFIGHIGATELAAYALV<br>STVLMRFSNGILLGMA SALETLCGQSYGAKQYHMLGIYLQRSWLVLFC CAVILL<br>PVYIFTTPLLIALGQDPEISAVAGTISLWYIPVMFSYIWAFTLQMYLQAQSKNMIV<br>TYLAFLNLGIHLFLSWLLTVKFQLGLAGVMGSMVISFWIPVFGQLAFVFFGGCP<br>LTWTGFSSSAFTDLGAIMKLSLSSGVMLCLELWYNTILVLLTGYMKNAEVALDA<br>LSICLNINGWEMMISIGFLSAIGVRVANELGAGSARRAKFAIFNVVTT SFLIGFVL<br>FVLFLFFRGLAYIFTESKAVADEVADLAPLLAFSILLNSVQPVLSGVAIGSGWQS<br>VVAYVNVTSYYFIGIPLGAILGYVLGFQAKGIWIGMLLGTLVQTLVLLFITLRTD<br>WKKQVEITRERLNRWYMDENGRSQNSIGNA<br>MTATSPPMRSVAAAALVLTPTPTLNRLSFPFAHRHCPSTAAPRWRPARCRGKP<br>AVEDVVHDDEEETWRREANPERKDGGEEMLRGRWFMVDEIGMEILTIALPAV<br>LALAADPITALIDTAFVGHVGSTELAAVGVSISIFNLVSKLLNVPLLNVTTSFVAE<br>QQAVDADYNSSVENSHIGEEISISQEKAGEQRKFLPAVSTSLALAAGIGLMETVA<br>LILGSGTLLDIVGVPVDSMPMRIPAEQFLT LRAYGAPPVIVALAAQGA FRGFMDT<br>KTPLFAVVAGNLVNALLDAIFIFPLGLGVSGAALATVTSEYLTAFILLWKLNSKI<br>VLFSWNIVSGDIIRYLKSGALLIARTIAVVL TFTVSTSLAAREGSVPMAGYEICLQ<br>VWLTISLLNDALALAGQALLASEYAKGNYKKARIVLYRVLQIGGVTGAALSTTL<br>LLGFGYLSMLFTDDAAVL DVAQTGVWFVTVSQPINAVAFVMDGLYYGVSDFA<br>FVAYSTLFAGAISSAVLLVAAPKFGLGGVWAGLTLFMSLR AIAGFWRLGSKGGP<br>WKIIWSETE<br>MERPGDEHDDCRTAPLLEPKHAHGEGSNNDKQEEDEEEV GSLGPRVLVESKK<br>LWVVAGPSICARFSTFGVTVISQAFIGHIGATELAGYALVSTVLMRFSGGILLGM<br>ASALETLCGQSYGAKQYHMLGIYLQRSWIVLLCCAVLLLPIYLF TTPLLIFLGQD<br>PKIAAMAGTISLWYIPVMISNVGNFTLQMYLQAQSKNMIVTYLAMLNLGLHLF<br>LSWLLTVQFHLGLAGVMGSMVIAIWIPVFGQLAFVFFGGCPLTW TGFSSAAFT<br>ELGAIVKLSLSSGVMLCVELWYNTILVLLTGYMKNAEIALDAL SICLNINGWEM<br>MISIGFLSATGVRVANELGAGSARRAKFAIFNVVTT SFSIGFMLFVLFLIFRGRLA<br>YIFTESKVVADAVAELSPLLA FSILLNSIQPVLSGVAVGSGWQSVVAYVNVTSYY<br>LFGIPIGVILGYVLGFQVKGIWIGMLLGTLVQTIVLLFITLRTDWEKQVEIARQRL<br>NRWSMDENGRQQNPGENP<br>MEELKLMRRLCLPISALNLLHYVKSMVTVLCLGRLGRAELAGGALAVGLTNVT<br>GYSVLSGLALGLEPLAGQAFGSGTGRTRSRPRRALRRAVLLLLAASFPVAALWA<br>CAGPAARAARQDAAVARAAGSYCRYAIPDLAAA SVLLPARVYLRSKGETRRL<br>ASCAALAVALVHAPATAYLGARLRVPGVAMAA CMTSFATLAFLWISLTWAPA<br>QNEPDEPADLEEWAGVGQWAEWADLLRLSLPSCLSVCLEWWYELMTIAAG<br>YLRDPHTALATAAIVIQTTSLLYTIPVTLS SAVSTRVANELGAGRPRSAQVSFVV<br>AMGIAMMGSCVGLTWTTFGRGLWVQVFTTDPTIQSLTTSVLPVIGLCELANCP<br>QTTGCGVLRGSARPAVGAAINLYSFYLVGAPVALVLA FGLDMGFLGLCLGLLS<br>AQVVCLISVGFATFQTDWEAEALKAFHLVGGGDEKCGDDLPC LAHKENV<br>MAETSSARSPLLDVDESSGASEELLRREPVP RSVLSRLAAWEAGNLWRISWASIL<br>ITLLSFTLSLVTQM FVGHLELELAGASITNIGIQGLAYGIMIGMASAVQTVCGQ |
| OsMA<br>TE43 |                                                                                                                                                                                                                                                                                                                                                                                                                                                                                                                                                                                                                                                                                                                                                                                                                                                                                                                                                                                                                                                                                                                                                                                                                                                                                                                                                                                                                                                                                                                                                                                                                                                                                                                                                                                                                                                                                                                                                                                                                                                                                                                                                                                                                                                                                                                                                                                                                                                                                                                |
| OsMA<br>TE44 |                                                                                                                                                                                                                                                                                                                                                                                                                                                                                                                                                                                                                                                                                                                                                                                                                                                                                                                                                                                                                                                                                                                                                                                                                                                                                                                                                                                                                                                                                                                                                                                                                                                                                                                                                                                                                                                                                                                                                                                                                                                                                                                                                                                                                                                                                                                                                                                                                                                                                                                |
| OsMA<br>TE45 |                                                                                                                                                                                                                                                                                                                                                                                                                                                                                                                                                                                                                                                                                                                                                                                                                                                                                                                                                                                                                                                                                                                                                                                                                                                                                                                                                                                                                                                                                                                                                                                                                                                                                                                                                                                                                                                                                                                                                                                                                                                                                                                                                                                                                                                                                                                                                                                                                                                                                                                |
| OsMA<br>TE46 |                                                                                                                                                                                                                                                                                                                                                                                                                                                                                                                                                                                                                                                                                                                                                                                                                                                                                                                                                                                                                                                                                                                                                                                                                                                                                                                                                                                                                                                                                                                                                                                                                                                                                                                                                                                                                                                                                                                                                                                                                                                                                                                                                                                                                                                                                                                                                                                                                                                                                                                |

|             |                                                                                                                                                                                                                                                                                                                                                                                                                                                                                                                                                                                                                                                                                                                                                                                                                                                                                                                                                                                                                                                                                                                                                                                                                                                                                                                                                                                                                                                                                                                                                                                                                                                                                                                                                                                                                                                                                                                                                                                                                                                                                                                                                                                                                                                                                                                                                                                                                                                                                                                                                                                                                                                                                                                                                                                                                                                                                                                                                                                                                                                                                                                                                                    |
|-------------|--------------------------------------------------------------------------------------------------------------------------------------------------------------------------------------------------------------------------------------------------------------------------------------------------------------------------------------------------------------------------------------------------------------------------------------------------------------------------------------------------------------------------------------------------------------------------------------------------------------------------------------------------------------------------------------------------------------------------------------------------------------------------------------------------------------------------------------------------------------------------------------------------------------------------------------------------------------------------------------------------------------------------------------------------------------------------------------------------------------------------------------------------------------------------------------------------------------------------------------------------------------------------------------------------------------------------------------------------------------------------------------------------------------------------------------------------------------------------------------------------------------------------------------------------------------------------------------------------------------------------------------------------------------------------------------------------------------------------------------------------------------------------------------------------------------------------------------------------------------------------------------------------------------------------------------------------------------------------------------------------------------------------------------------------------------------------------------------------------------------------------------------------------------------------------------------------------------------------------------------------------------------------------------------------------------------------------------------------------------------------------------------------------------------------------------------------------------------------------------------------------------------------------------------------------------------------------------------------------------------------------------------------------------------------------------------------------------------------------------------------------------------------------------------------------------------------------------------------------------------------------------------------------------------------------------------------------------------------------------------------------------------------------------------------------------------------------------------------------------------------------------------------------------------|
| OsMA<br>TE5 | <p>             AYGARKFRAMGIVCQRALVLQFATAIVIAFLYWYAGPFLRLIGQAADVAAAG<br/>             QLYARGLVPQLLAFALFCPMQRFLQAQNIVNPVAYITMAVLIFHILISWLTVFVL<br/>             GFGLLGAALTLSFSWWVLVALTWGLMVWTPACKETWTGLSVLAFRGLWG YA<br/>             KLAFASAVMLALEIWYVQGFVLLTGFLPDPEIALDSLSICINYWNWDFQIMLGL<br/>             SYAASIRVGNELGAGHPNVARFSVFVITASVAFSILATILVLVRLYPLSTLYTSST<br/>             TVIEAVIKLTPLLSISIFLNGIQPILSGVAVGSGWQVVVAYVNVGAYYLIGLPICG<br/>             VLGKYSLSGAAGIWWGLIIGVSVQTVALIITARTNWDNEVMKAIQRLRQTAVD<br/>             DGTVPVDDIE<br/>             MSAHLRLLSAAPLPALLPTRRLPAVPTPALAARAARLVLSRPLTEPQPPRLPRG<br/>             AAARCRGVAVAGADGDEPAAAAAGTAGLWEQVRDIVVFAGPALGLWICGPL<br/>             MSLIDTMVIGQTSSLQLAALGPGTVFCDYLCYIFMFLSIATSNMVATSLAKKDEE<br/>             LAQHQVSMMLLFVALTCGLGMFLFTKLFGTQVLTFTGSGNYDIISAANTY AQIR<br/>             GFAWPAVLVGLVAQSASLGMKDSWGPKALAAASVINGVGDLLCSVCGYGI<br/>             AGAAWATMVSQIVAAFMMMQLNLKRGFRAFSTIPSSSELLQIFEIAAPVFITM<br/>             TSKVAFYALLTYSATSMGAILAAHQVMVNVLCMCTVWGEPLSQT AQSFMP<br/>             LIYGAKCNLMKARMLLKSVMIGAITGTTVGAVGTLVPWLPFSLFTNDFMVVQ<br/>             QMHKVLIPYFCALLVTPSVHSLEGTLLAGRDLRFLSQSMGACFGIGTFLLMV<br/>             MSSPRRDGRGAVDDLTA SL LHKGDGGEAVFVVVVVPPVAEEEEPPPVLTCKPP<br/>             GRFARAVKEAWSVPFPMMPMSMSAGAAAGAEARSILGLALPMLTGLLLYL RSMIS<br/>             MLFLGRGLGGLALAGGSLAIGFANITGYSVLSGLAMGMEPICGQAFGAGHYDLL<br/>             GVTMQRVTLLLVAASVPIAGLWVHMRPLLLLCGQDAAIAAVAETYILASLPDL<br/>             LLQAFLHPVRIYLRTQSINLPLTVCAALAIALHLPINYVAVSVLGLGIKGV ALAS<br/>             VLANLNLVLF LFGYIWFKGVHKRTGGFALSADCLRGWGELVSLALPSCISVCLE<br/>             WWWYEIMILLCGLLANPQATVASMGILIQTTSLIYFPSSLGFGVSTRVSNELGA<br/>             NRPERACRAATVGLMLGFAFGGVASAFACHVRGAWATMFTADPAIVALTAS<br/>             VLPILGACELGNCPQTTGCGVL RGSARPKDAASINLRSFYLVGTPVALILAFWY<br/>             HYDFRGLWLGLLAAQATCVVRMLLVIGETDWTAEAKRAQQLTGAADIKDCG<br/>             GKGDHVAVIEQPDEQC<br/>             MAYTEPLLLSARHTTQTSPRHLLRSRHAAAAAADGRMVVAVQDDET GALV<br/>             AAVGKGDEDDDDDDDAVAGEEDEDEDDAPVVRTARGAWEVFAAESRRLWAI<br/>             GAPIAFNVICLYGTNSTTQIFVGHIGNRELSAVAIGLSVVS NFSFGLLGMGSALE<br/>             T LCGQAFGAGQVAM LGIYMQRSWIILAASAALLSPLYVFAGPILRLLGQEE SIA<br/>             AAAGEFTVRIIPQMFALAINFPTQKFLQAQSKVTVLAWIGFAALLAHVGLLALF<br/>             VSALGWGIAGAAAAYDVSSWLTALAQVAYVVGWCRDGWTGLSRKAFNELW<br/>             AFVKLSLASAVMLCLEIWYMMVLVVL TGHLD DAEIAVDSSISICMNINGWEGML<br/>             FIGLNAAISVRVSNELGSGRPRATMHAVVVVLVQSLAFGLLAMVLILATR NHF<br/>             AVIFTGDRHLQKAVANIAYMLAVTMVLNSIQPVW RSAADGREWWRTLIWRVT<br/>             TASASLSASYLATSSDGV<br/>             MGDGRGDEEECRVALLNGGGAKEGWQVVSGDGKLR RRVWEESRKLWVIV<br/>             APAIFSRVVTYSMNVITQAFAGHLGDLELAAISIAN TVVVG FNFGLMLGMASAL<br/>             ETLCGQAFGAKKYHMMGVYMQRSWIVLLACAVLLLPMYIYAEDVLLLTGQPP<br/>             ELSAMAGRVSVWFIPLHLSFAFLFPLQRFLQCQMKNFASAAASGVALCVHVAIS<br/>             WLLVSRFRFGLVGIALTLNFSWWATAAMLFA YVACGGCPETWNGLSLEAFAG<br/>             CHAMLLTEFVCLICSLENWYYRILILLTGNLKNAAIAVDALSICMTINAWELMIP           </p> |
| OsMA<br>TE6 |                                                                                                                                                                                                                                                                                                                                                                                                                                                                                                                                                                                                                                                                                                                                                                                                                                                                                                                                                                                                                                                                                                                                                                                                                                                                                                                                                                                                                                                                                                                                                                                                                                                                                                                                                                                                                                                                                                                                                                                                                                                                                                                                                                                                                                                                                                                                                                                                                                                                                                                                                                                                                                                                                                                                                                                                                                                                                                                                                                                                                                                                                                                                                                    |
| OsMA<br>TE7 |                                                                                                                                                                                                                                                                                                                                                                                                                                                                                                                                                                                                                                                                                                                                                                                                                                                                                                                                                                                                                                                                                                                                                                                                                                                                                                                                                                                                                                                                                                                                                                                                                                                                                                                                                                                                                                                                                                                                                                                                                                                                                                                                                                                                                                                                                                                                                                                                                                                                                                                                                                                                                                                                                                                                                                                                                                                                                                                                                                                                                                                                                                                                                                    |
| OsMA<br>TE8 |                                                                                                                                                                                                                                                                                                                                                                                                                                                                                                                                                                                                                                                                                                                                                                                                                                                                                                                                                                                                                                                                                                                                                                                                                                                                                                                                                                                                                                                                                                                                                                                                                                                                                                                                                                                                                                                                                                                                                                                                                                                                                                                                                                                                                                                                                                                                                                                                                                                                                                                                                                                                                                                                                                                                                                                                                                                                                                                                                                                                                                                                                                                                                                    |

|             |                                                                                                                                                                                                                                                                                                                                                                                                                                                                                                                                                                                                                                                                                                                                                                                                                            |
|-------------|----------------------------------------------------------------------------------------------------------------------------------------------------------------------------------------------------------------------------------------------------------------------------------------------------------------------------------------------------------------------------------------------------------------------------------------------------------------------------------------------------------------------------------------------------------------------------------------------------------------------------------------------------------------------------------------------------------------------------------------------------------------------------------------------------------------------------|
| OsMA<br>TE9 | LAFFAGTGVRVANELGAGNGKGARFATIVSSVTSLVIGLFFWVLIVGLHDKFAL<br>IFTSSDVVLDAVDNLSVLLAFTILLNSIQPVLSGVAVGSGWQSMVAYVNIGTYYL<br>IGIPMGILLGWLFLKGLVLIWAGMIGGTAVQTLILAIITIRCDWDKEAMIASTRM<br>DKWSQVR<br>MAGLKKMEEVTAAAAAVAASSTAEEKRAAAVVVPDAALTMNGAAGAEKTA<br>AAAAAPEDLPAPAALSGWPRRVGLYLFVMNIRSVFKLDELGSEVLRIAVPASLA<br>LAADPLASLVDTAFIGRLGSVEIAAVGVSAIFNQVSKVCIYPLVSVTTSFVAEED<br>AIISKCIEENSSQDLEKASPVDSETNNLPVSGPDKVECVNSCIPTECTNPSDQGCK<br>RKYIPSVTSAVIVGSFLGLLQAVFLVFSAKFVLNIMGVKNDSPLMRPAVRYLTIRS<br>LGAPAVLLSLAMQGVFRGFKDTKTPLYATVVGDAANIILDPILMFVCHMGVTG<br>AAVAHVISQYLITMILLCRLIRQVDVIPPSTLSLKFGRFLGCGFLLLARVAVTFC<br>VTASSLAARHGPTIMAAFQICQQLWLATSLADGLAVAGQAVLASAFKND<br>KGKVVVATSRVLQLSIVLGMGLTVVLGVGMKFGAGIFTKDIDVIDVIHKGIPFV<br>AGTQTINSLAFVFDGINFGASDYTYSAYSMVGVAAISIPCLVYLSAHNGFIGIWI<br>ALTIYMSLRRTIASTWRMGAARGPWVFLRK |
|             |                                                                                                                                                                                                                                                                                                                                                                                                                                                                                                                                                                                                                                                                                                                                                                                                                            |

**Table S4.** The primers used in this study

| Name                                                           | Primer sequence                        |
|----------------------------------------------------------------|----------------------------------------|
| Primers for Gene cloning and Construction of expression vector |                                        |
| GmMATE13-F                                                     | 5'-ATGATGCCCTTTTGATGTTAT-3'            |
| GmMATE13-R                                                     | 5'-CTAAAGCCCAACATTGTTTACC-3'           |
| GmMATE75-F                                                     | 5'-ATGGACGAGAATAGAAGTTCCAAC-3'         |
| GmMATE75-R                                                     | 5'-TCACTAAGGCAGTGAGCGACCTC-3'          |
| Primers for qRT-PCR in tamba black soybean                     |                                        |
| q18S rRNA-F                                                    | 5'-ATGATAACTCGACGGATCGC-3'             |
| q18S rRNA-R                                                    | 5'-CTTGGATGTGGTAGCCGTTT-3'             |
| qGmMATE13-F                                                    | 5'-CTCCCTACTACTCTGGCTTTGGC-3'          |
| qGmMATE13-F                                                    | 5'-TTGTTTCATCAGCAGCATCTTCC-3'          |
| qGmMATE75-F                                                    | CCAACGAACCCAACAAGTGG                   |
| qGmMATE75-R                                                    | CCGGTCCTAAACGGCCTATG                   |
| Primers for subcellular localization                           |                                        |
| GmMATE13-F-XbaI                                                | 5'-GCTCTAGAATGATGCCCTTTTGATGTTAT-3'    |
| GmMATE13-R-SmaI                                                | 5'-TCCCCCGGGAAGCCCAACATTGTTTACC-3'     |
| GmMATE75-F-XbaI                                                | 5'-GCTCTAGAATGGACGAGAATAGAAGTTCCAAC-3' |
| GmMATE75-R-SmaI                                                | 5'-TCCCCCGGGCTAAGGCAGTGAGCGACCTC-3'    |
